# Supplementary material for: Exogenous Spermidine Priming Mitigates the Osmotic Damage in Germinating Seeds of Leymus chinensis Under Salt-Alkali Stress
Source: Front Plant Sci. 2021 Oct 13;12:701538. doi: 10.3389/fpls.2021.701538 (PMC8548376; doi:10.3389/fpls.2021.701538)
Supplement: Supplementary file 2 [file Data_Sheet_1.xlsx]

## Sheet: Sheet1
Gene_id	readcount_Spd	readcount_Control	log2FoldChange	pval	padj	NR_ID	NR_GI	NR_Score	NR_Evalue	NR_Description	NT_ID	NT_GI	NT_Score	NT_Evalue	NT_Description	SwissProt_ID	SwissProt_GI	SwissProt_Score	SwissProt_Evalue	SwissProt_Description	1st-level(pathway)	2nd-level(pathway)	3rd-level(pathway)	PathwayID	KoID	KoDescription	EC	KOG_ID	Abbreviation	KOG_Description	Pfam_ID	Pfam_Description	Gene Ontology Biological Process	BP Description	Gene Ontology Molecular Function	MF Description	Gene Ontology Cellular Component	CC Description
TRINITY_DN133623_c0_g1	32.9931	0.335848	6.6182	4.253e-09	0.00015096	gi|1027163903|gb|OAG24272.1|	1027163903	258	5.53e-85	YjgF-like protein [Alternaria alternata]	gi|1070543075|ref|XM_018526427.1|	1070543075	448	2.65e-121	Alternaria alternata hypothetical protein partial mRNA	-	-	-	-	-	-	-	-	-	-	-	-	-	-	-	PF01042.21//PF11951.8	Ribonuc_L-PSP//Fungal_trans_2	-	-	-	-	-	-
TRINITY_DN220175_c0_g1	18.8168	0.335848	5.8081	2.1521e-05	0.12731	gi|1040546387|gb|OBT82222.1|	1040546387	197	7.28e-60	hypothetical protein VE02_09000 [Pseudogymnoascus sp. 03VT05]	-	-	-	-	-	gi|121735604|sp|Q0CEU4.1|EGLD_ASPTN	121735604	77.4	5.54e-15	RecName: Full=Probable endo-beta-1,4-glucanase D; Short=Endoglucanase D; AltName: Full=Carboxymethylcellulase D; AltName: Full=Cellulase D; Flags: Precursor	-	-	-	-	-	-	-	-	-	-	PF03443.14	Glyco_hydro_61	-	-	-	-	-	-
TRINITY_DN57206_c0_g1	207.894	3.92068	5.7286	0.00015447	0.43002	gi|1028520723|gb|OAI96664.1|	1028520723	139	2.51e-36	hypothetical protein A4X13_g9143 [Tilletia indica]	-	-	-	-	-	-	-	-	-	-	-	-	-	-	-	-	-	-	-	-	-	-	-	-	-	-	-	-
TRINITY_DN39835_c0_g1	17.0867	0.335848	5.6689	6.0312e-05	0.23143	gi|972534603|gb|KUJ11237.1|	972534603	90.5	5.17e-18	esterase LipW [Phialocephala scopiformis]	gi|1321817027|gb|CP019066.1|	1321817027	65.8	3.2e-06	Tsukamurella tyrosinosolvens strain MH1 chromosome, complete genome	gi|75324272|sp|Q6L545.1|GID1_ORYSJ	75324272	50.8	5.97e-06	RecName: Full=Gibberellin receptor GID1; AltName: Full=Gibberellin-insensitive dwarf protein 1; AltName: Full=Protein GIBBERELLIN INSENSITIVE DWARF1	-	-	-	-	-	-	-	KOG1515	V	Arylacetamide deacetylase	PF07859.13	Abhydrolase_3	-	-	-	-	-	-
TRINITY_DN179609_c0_g1	16.6754	0.36054	5.5314	0.029043	1	gi|367052499|ref|XP_003656628.1|	367052499	62	4.51e-09	hypothetical protein THITE_2171281 [Thielavia terrestris NRRL 8126]	-	-	-	-	-	-	-	-	-	-	-	-	-	-	-	-	-	-	-	-	-	-	-	-	-	-	-	-
TRINITY_DN223796_c0_g1	13.5078	0.335848	5.3298	0.00054857	0.97356	gi|1027156770|gb|OAG17155.1|	1027156770	545	0	hypothetical protein CC77DRAFT_1097613 [Alternaria alternata]	gi|1343453185|gb|CP022025.1|	1343453185	911	0	Alternaria solani isolate NL03003 chromosome 2, complete sequence	-	-	-	-	-	-	-	-	-	-	-	-	-	-	-	-	-	-	-	-	-	-	-
TRINITY_DN55855_c0_g1	10.6409	0.295362	5.171	0.0040441	1	gi|326506834|dbj|BAJ91458.1|	326506834	73.9	4.7e-11	predicted protein [Hordeum vulgare subsp. vulgare]	gi|1149716658|ref|XM_020328748.1|	1149716658	113	1.78e-20	PREDICTED: Aegilops tauschii subsp. tauschii elongation factor 1-delta 1-like (LOC109770043), transcript variant X2, mRNA	-	-	-	-	-	-	-	-	-	-	-	-	-	-	-	-	-	GO:0055114//GO:0009115	oxidation-reduction process//xanthine catabolic process	GO:0051537//GO:0009055//GO:0016614//GO:0016903//GO:0004854//GO:0050660//GO:0005506	2 iron, 2 sulfur cluster binding//electron transfer activity//oxidoreductase activity, acting on CH-OH group of donors//oxidoreductase activity, acting on the aldehyde or oxo group of donors//xanthine dehydrogenase activity//flavin adenine dinucleotide binding//iron ion binding	GO:0005829//GO:0009536	cytosol//plastid
TRINITY_DN93131_c0_g1	21.0733	0.590724	5.1568	0.0028474	1	gi|1027162166|gb|OAG22538.1|	1027162166	239	6.65e-80	hypothetical protein CC77DRAFT_1007070 [Alternaria alternata]	gi|115400220|ref|XM_001215699.1|	115400220	106	1.05e-18	Aspergillus terreus NIH2624 hypothetical protein (ATEG_06521) partial mRNA	-	-	-	-	-	-	-	-	-	-	-	-	-	-	-	PF12585.8	DUF3759	--	--	--	--	GO:0016021	integral component of membrane
TRINITY_DN32417_c0_g1	11.9311	0.335848	5.1508	0.0036554	1	gi|1027165563|gb|OAG25930.1|	1027165563	137	3.65e-35	hypothetical protein CC77DRAFT_923659 [Alternaria alternata]	gi|1148909655|ref|XM_020274470.1|	1148909655	76.8	1.61e-09	Diplodia corticola lytic polysaccharide monooxygenase (BKCO1_3200077), partial mRNA	-	-	-	-	-	-	-	-	-	-	-	-	-	-	-	-	-	GO:0055114	oxidation-reduction process	GO:0004497	monooxygenase activity	--	--
TRINITY_DN46326_c0_g1	12.1391	0.36054	5.0734	0.0012421	1	gi|474277365|gb|EMS61130.1|	474277365	84	1.34e-18	hypothetical protein TRIUR3_21694 [Triticum urartu]	gi|1149765267|ref|XM_020292136.1|	1149765267	195	2.4e-45	PREDICTED: Aegilops tauschii subsp. tauschii early nodulin-93-like (LOC109732932), mRNA	gi|730165|sp|Q02921.1|NO93_SOYBN	730165	65.1	7.88e-13	RecName: Full=Early nodulin-93; Short=N-93	-	-	-	-	-	-	-	-	-	-	PF03386.14	ENOD93	--	--	--	--	GO:0016021	integral component of membrane
TRINITY_DN39829_c0_g2	9.78312	0.295362	5.0497	0.029059	1	gi|681100290|emb|CDP29968.1|	681100290	473	1.68e-166	Putative mitochondrial thiazole biosynthetic enzyme precursor [Podospora anserina S mat+]	gi|675324087|gb|CP009075.1|	675324087	472	1.59e-128	Verticillium dahliae JR2 chromosome 1, complete sequence	gi|74670874|sp|Q4WMX7.1|THI4_ASPFU	74670874	374	2.33e-129	RecName: Full=Thiamine thiazole synthase; AltName: Full=Thiazole biosynthetic enzyme	Metabolism	Metabolism of cofactors and vitamins	Thiamine metabolism	ko00730	K03146	thiamine thiazole synthase	--	-	-	-	PF01946.17	Thi4	GO:0055114//GO:0052837//GO:0000002//GO:0009228//GO:0006950	oxidation-reduction process//thiazole biosynthetic process//mitochondrial genome maintenance//thiamine biosynthetic process//response to stress	GO:0008198//GO:0042802//GO:0016491	ferrous iron binding//identical protein binding//oxidoreductase activity	GO:0005829//GO:0005634	cytosol//nucleus
TRINITY_DN230257_c0_g1	9.31829	0.295362	4.9795	0.021616	1	gi|1027152852|gb|OAG13266.1|	1027152852	434	6.45e-150	Sulfide:quinone oxidoreductase mitochondrial precursor [Alternaria alternata]	gi|70982731|ref|XM_741801.1|	70982731	110	1.36e-19	Aspergillus fumigatus Af293 conserved hypothetical protein (AFUA_7G00350), partial mRNA	gi|74996502|sp|Q54DK1.1|SQRD_DICDI	74996502	157	1.08e-43	RecName: Full=Sulfide:quinone oxidoreductase, mitochondrial; Flags: Precursor	-	-	-	-	-	-	-	-	-	-	-	-	GO:0055114	oxidation-reduction process	GO:0016491	oxidoreductase activity	--	--
TRINITY_DN45151_c0_g2	31.6751	1.01644	4.9617	0.00011828	0.39365	gi|1028518494|gb|OAI95743.1|	1028518494	203	1.46e-61	hypothetical protein A4X06_g9679, partial [Tilletia controversa]	-	-	-	-	-	gi|139141|sp|P22591.1|RDRP_PVXCP	139141	52.8	3.85e-07	RecName: Full=RNA replication protein; AltName: Full=165 kDa protein; AltName: Full=ORF1 protein; Includes: RecName: Full=RNA-directed RNA polymerase; Includes: RecName: Full=Helicase	-	-	-	-	-	-	-	-	-	-	-	-	-	-	-	-	-	-
TRINITY_DN59183_c1_g2	11.2144	0.36054	4.9591	0.002235	1	gi|474395146|gb|EMS65676.1|	474395146	181	2.34e-47	hypothetical protein TRIUR3_14928 [Triticum urartu]	-	-	-	-	-	-	-	-	-	-	-	-	-	-	-	-	-	-	-	-	-	-	--	--	GO:0003676//GO:0008270	nucleic acid binding//zinc ion binding	--	--
TRINITY_DN42997_c2_g1	10.9413	0.36054	4.9235	0.027715	1	gi|1003737668|gb|KXX74526.1|	1003737668	209	1.8e-66	hypothetical protein MMYC01_209028 [Madurella mycetomatis]	gi|1069530938|ref|XM_018293868.1|	1069530938	106	1.57e-18	Pochonia chlamydosporia 170 ribosomal protein L14 (VFPPC_16115), partial mRNA	gi|2500361|sp|P55841.1|RL14_DROME	2500361	66.6	2.42e-12	RecName: Full=60S ribosomal protein L14	-	-	-	-	-	-	-	KOG3421	J	60S ribosomal protein L14	PF01929.17	Ribosomal_L14e	GO:0042273//GO:0006412	ribosomal large subunit biogenesis//translation	GO:0003735	structural constituent of ribosome	GO:0022625//GO:0005634	cytosolic large ribosomal subunit//nucleus
TRINITY_DN124884_c0_g1	8.81387	0.295362	4.8992	0.0096005	1	gi|549046464|emb|CCX32773.1|	549046464	65.1	1.96e-08	Similar to Inorganic phosphate transporter PHO84; acc. no. P25297 [Pyronema omphalodes CBS 100304]	gi|918799564|ref|XM_013568249.1|	918799564	196	1.73e-45	Aureobasidium namibiae CBS 147.97 MFS transporter partial mRNA	gi|75277915|sp|O48639.1|PHT13_ARATH	75277915	158	2.39e-41	RecName: Full=Probable inorganic phosphate transporter 1-3; Short=AtPht1;3; AltName: Full=H(+)/Pi cotransporter	--	--	--	--	K08176	MFS transporter, PHS family, inorganic phosphate transporter	--	KOG0252	P	Inorganic phosphate transporter	PF00083.24	Sugar_tr	GO:0097080//GO:0006797//GO:0071421//GO:0006817	plasma membrane selenite transport//polyphosphate metabolic process//manganese ion transmembrane transport//phosphate ion transport	GO:0097079//GO:0005315//GO:0005384	selenite:proton symporter activity//inorganic phosphate transmembrane transporter activity//manganese ion transmembrane transporter activity	GO:0005887//GO:0015992	integral component of plasma membrane//
TRINITY_DN48624_c6_g3	41.1386	1.44216	4.8342	1.3278e-05	0.085692	gi|669027313|emb|CDM80630.1|	669027313	227	2.7e-63	unnamed protein product [Triticum aestivum]	-	-	-	-	-	gi|29839583|sp|Q8W3K3.1|DRL8_ARATH	29839583	91.3	2.02e-18	RecName: Full=Putative disease resistance protein At1g58400	-	-	-	-	-	-	-	KOG4658	T	Apoptotic ATPase	PF00931.22	NB-ARC	-	-	-	-	-	-
TRINITY_DN49773_c1_g1	9.19969	0.335848	4.7757	0.0076337	1	gi|1039337951|gb|ANN11962.1|	1039337951	344	7.1e-119	ribosomal protein S5 [Puccinia helianthi]	gi|195351649|ref|XM_002042311.1|	195351649	357	3.46e-94	Drosophila sechellia GM13336 (Dsec\GM13336), mRNA	gi|27735255|sp|P51427.2|RS52_ARATH	27735255	311	1.49e-107	RecName: Full=40S ribosomal protein S5-2	Genetic Information Processing	Translation	Ribosome	ko03010	K02989	small subunit ribosomal protein S5e	--	KOG3291	J	Ribosomal protein S7	PF00177.21	Ribosomal_S7	GO:0006412//GO:0000028	translation//ribosomal small subunit assembly	GO:0003729//GO:0019843//GO:0003735	mRNA binding//rRNA binding//structural constituent of ribosome	GO:0022627	cytosolic small ribosomal subunit
TRINITY_DN15514_c0_g1	7.86959	0.295362	4.7357	0.01727	1	gi|667836943|ref|XP_007782640.1|	667836943	137	4.58e-34	hypothetical protein W97_06576 [Coniosporium apollinis CBS 100218]	-	-	-	-	-	-	-	-	-	-	-	-	-	-	-	-	-	-	-	-	PF10342.9	GPI-anchored	-	-	-	-	-	-
TRINITY_DN56255_c6_g1	16.178	0.63121	4.6798	0.00030098	0.68847	gi|474311709|gb|EMS61933.1|	474311709	100	2.21e-22	hypothetical protein TRIUR3_31361 [Triticum urartu]	gi|1149730240|ref|XR_002236017.1|	1149730240	195	4.78e-45	PREDICTED: Aegilops tauschii subsp. tauschii uncharacterized LOC109776240 (LOC109776240), transcript variant X10, ncRNA	-	-	-	-	-	-	-	-	-	-	-	-	-	-	-	PF03283.13//PF13920.6	PAE//zf-C3HC4_3	-	-	-	-	-	-
TRINITY_DN33548_c0_g1	7.46528	0.295362	4.6596	0.021536	1	gi|1027163080|gb|OAG23451.1|	1027163080	533	0	hypothetical protein CC77DRAFT_930096 [Alternaria alternata]	gi|189200133|ref|XM_001936369.1|	189200133	267	9.2e-67	Pyrenophora tritici-repentis Pt-1C-BFP conserved hypothetical protein, mRNA	-	-	-	-	-	-	-	-	-	-	-	-	-	-	-	-	-	-	-	-	-	-	-
TRINITY_DN28240_c1_g1	17.5788	0.696388	4.6578	0.00013593	0.4106	gi|748513406|ref|XP_011123988.1|	748513406	214	2.05e-65	hypothetical protein AOL_s00083g507 [Arthrobotrys oligospora ATCC 24927]	-	-	-	-	-	gi|75165198|sp|Q94C69.1|CSP3_ARATH	75165198	68.2	1.82e-11	RecName: Full=Cold shock domain-containing protein 3; Short=AtCSP3	--	--	--	--	K09250	cellular nucleic acid-binding protein	--	-	-	-	PF09733.9//PF00098.23//PF12051.8	VEFS-Box//zf-CCHC//DUF3533	--	--	GO:0046872	metal ion binding	--	--
TRINITY_DN24597_c0_g1	8.2179	0.335848	4.6129	0.013903	1	gi|554914650|gb|ESK95764.1|	554914650	157	6.85e-44	endoglucanase ii [Moniliophthora roreri MCA 2997]	-	-	-	-	-	gi|408407604|sp|G2Q9T3.1|CEL61_THIHA	408407604	83.6	3.04e-17	RecName: Full=Polysaccharide monooxygenase Cel61a; AltName: Full=Cellulase-61a; Short=Cel61a; AltName: Full=Endoglucanase-61a; AltName: Full=Glycoside hydrolase-61; Short=GH-61; Flags: Precursor	-	-	-	-	-	-	-	-	-	-	PF03443.14//PF00734.18//PF04899.12	Glyco_hydro_61//CBM_1//MbeD_MobD	-	-	-	-	-	-
TRINITY_DN55506_c0_g2	38.2211	1.60716	4.5718	0.0056428	1	gi|400201741|ref|YP_006576201.1|	400201741	1026	0	NADH dehydrogenase subunit 5 (mitochondrion) [Madurella mycetomatis]	gi|1150313129|gb|KX885101.1|	1150313129	1515	0	Colletotrichum siamense strain LQ22 mitochondrion, complete genome	gi|121919090|sp|Q0H8X0.1|NU5M_USTMA	121919090	622	0	RecName: Full=NADH-ubiquinone oxidoreductase chain 5; AltName: Full=NADH dehydrogenase subunit 5	Human Diseases	Neurodegenerative diseases	Parkinson's disease	ko05012	K03883	NADH-ubiquinone oxidoreductase chain 5	1.6.5.3	KOG4668	C	NADH dehydrogenase subunits 2, 5, and related proteins	PF00420.24//PF00662.20//PF00361.20//PF06455.11//PF00033.19	Oxidored_q2//Proton_antipo_N//Proton_antipo_M//NADH5_C//Cytochrome_B	GO:0042773	ATP synthesis coupled electron transport	GO:0008137	NADH dehydrogenase (ubiquinone) activity	GO:0016021//GO:0005743//GO:0070469	integral component of membrane//mitochondrial inner membrane//respirasome
TRINITY_DN121659_c0_g1	7.88213	0.335848	4.5527	0.017008	1	gi|50253166|dbj|BAD29411.1|	50253166	107	1.98e-23	ankyrin-like protein [Oryza sativa Japonica Group]	-	-	-	-	-	-	-	-	-	-	-	-	-	-	-	-	-	-	-	-	PF13962.6	PGG	-	-	-	-	-	-
TRINITY_DN29366_c0_g1	30.596	1.34339	4.5094	0.013082	1	gi|1027163001|gb|OAG23372.1|	1027163001	193	1.07e-56	cysteine dioxygenase [Alternaria alternata]	gi|1070546473|ref|XM_018536165.1|	1070546473	267	1.19e-66	Alternaria alternata hypothetical protein mRNA	gi|76364109|sp|Q6NWZ9.1|CDO1_DANRE	76364109	61.2	1.16e-09	RecName: Full=Cysteine dioxygenase type 1; AltName: Full=Cysteine dioxygenase type I; Short=CDO; Short=CDO-I	-	-	-	-	-	-	-	KOG4064	E	Cysteine dioxygenase CDO1	PF01484.17//PF05995.12	Col_cuticle_N//CDO_I	GO:0055114	oxidation-reduction process	GO:0005506//GO:0017172	iron ion binding//cysteine dioxygenase activity	--	--
TRINITY_DN137929_c0_g1	15.1188	0.671696	4.4924	0.00058924	1	gi|1027153978|gb|OAG14376.1|	1027153978	224	7.62e-74	hypothetical protein CC77DRAFT_1066952 [Alternaria alternata]	gi|1070563697|ref|XM_018528941.1|	1070563697	593	1.91e-165	Alternaria alternata hypothetical protein partial mRNA	-	-	-	-	-	-	-	-	-	-	-	-	-	-	-	-	-	-	-	-	-	-	-
TRINITY_DN31956_c0_g1	7.5349	0.335848	4.4877	0.020865	1	gi|242788076|ref|XP_002481149.1|	242788076	220	5.46e-66	stearic acid desaturase (SdeA), putative [Talaromyces stipitatus ATCC 10500]	gi|367045881|ref|XM_003653273.1|	367045881	204	6.25e-48	Thielavia terrestris NRRL 8126 delta-9 acyl-CoA desaturase mRNA	gi|1703084|sp|P21147.2|ACO1_YEAST	1703084	103	1.67e-23	RecName: Full=Acyl-CoA desaturase 1; AltName: Full=Delta 9 fatty acid desaturase; AltName: Full=Fatty acid desaturase 1; AltName: Full=Stearoyl-CoA desaturase 1	Environmental Information Processing	Signal transduction	AMPK signaling pathway	ko04152	K00507	stearoyl-CoA desaturase (Delta-9 desaturase)	1.14.19.1	-	-	-	PF00173.28	Cyt-b5	GO:0055114//GO:0043936//GO:0006636	oxidation-reduction process//asexual sporulation resulting in formation of a cellular spore//unsaturated fatty acid biosynthetic process	GO:0004768//GO:0020037//GO:0005506	stearoyl-CoA 9-desaturase activity//heme binding//iron ion binding	GO:0016021//GO:0005783	integral component of membrane//endoplasmic reticulum
TRINITY_DN175107_c0_g1	6.57105	0.295362	4.4756	0.037979	1	gi|549045642|emb|CCX33368.1|	549045642	226	1.98e-69	Similar to Protein TOS1; acc. no. P38288 [Pyronema omphalodes CBS 100304]	-	-	-	-	-	gi|939204614|sp|D4AQ83.1|PGA52_ARTBC	939204614	127	1.15e-32	RecName: Full=PGA52-like protein ARB_06390; AltName: Full=Allergen Asp f 4 homolog; Flags: Precursor	-	-	-	-	-	-	-	-	-	-	PF10287.9	DUF2401	--	--	--	--	GO:0044464	cell part
TRINITY_DN34665_c0_g1	6.46662	0.295362	4.4525	0.039108	1	gi|549045708|emb|CCX33257.1|	549045708	483	1.7e-165	Similar to 1,3-beta-glucanosyltransferase gel4; acc. no. B0XVI5 [Pyronema omphalodes CBS 100304]	gi|628301660|ref|XM_007735922.1|	628301660	171	9.65e-38	Capronia epimyces CBS 606.96 hypothetical protein partial mRNA	gi|74585103|sp|Q59VW6.1|PGA5_CANAL	74585103	301	1.33e-94	RecName: Full=1,3-beta-glucanosyltransferase PGA5; AltName: Full=Predicted GPI-anchored protein 5; Flags: Precursor	-	-	-	-	-	-	-	-	-	-	PF03198.14//PF07983.13	Glyco_hydro_72//X8	GO:0071704//GO:0044238//GO:0016043	organic substance metabolic process//primary metabolic process//cellular component organization	GO:0016740	transferase activity	GO:0043231//GO:0031224//GO:0009277//GO:0044699//GO:0044444	intracellular membrane-bounded organelle//intrinsic component of membrane//fungal-type cell wall////cytoplasmic part
TRINITY_DN32094_c0_g1	7.20238	0.335848	4.4226	0.025475	1	gi|1027163309|gb|OAG23679.1|	1027163309	196	1.09e-62	hypothetical protein CC77DRAFT_1017335 [Alternaria alternata]	gi|315042857|ref|XM_003170757.1|	315042857	67.6	5.14e-07	Nannizzia gypsea CBS 118893 hypothetical protein (MGYG_06796), partial mRNA	gi|81674472|sp|Q5HNY9.1|GCH1L_STAEQ	81674472	57.4	8.25e-09	RecName: Full=GTP cyclohydrolase 1 type 2 homolog	-	-	-	-	-	-	-	-	-	-	-	-	-	-	-	-	-	-
TRINITY_DN118941_c0_g1	6.32393	0.295362	4.4203	0.046059	1	gi|1027153044|gb|OAG13453.1|	1027153044	449	3.25e-159	hypothetical protein CC77DRAFT_1045358 [Alternaria alternata]	gi|189196055|ref|XM_001934331.1|	189196055	95.3	3.48e-15	Pyrenophora tritici-repentis Pt-1C-BFP conserved hypothetical protein, mRNA	-	-	-	-	-	-	-	-	-	-	-	-	-	-	-	-	-	-	-	-	-	-	-
TRINITY_DN21296_c0_g2	13.51	0.63121	4.4198	0.0015069	1	gi|396465508|ref|XP_003837362.1|	396465508	503	8.36e-178	hypothetical protein LEMA_P035960.1 [Leptosphaeria maculans JN3]	gi|627819922|ref|XM_007684611.1|	627819922	697	0	Bipolaris oryzae ATCC 44560 hypothetical protein partial mRNA	gi|259547411|sp|C5A2H1.1|PYRB_THEGJ	259547411	265	1.66e-86	RecName: Full=Aspartate carbamoyltransferase; AltName: Full=Aspartate transcarbamylase; Short=ATCase	-	-	-	-	-	-	-	-	-	-	PF02729.21//PF00185.24	OTCace_N//OTCace	GO:0045984//GO:0006541//GO:0006207	negative regulation of pyrimidine nucleobase metabolic process//glutamine metabolic process//'de novo' pyrimidine nucleobase biosynthetic process	GO:0004088//GO:0046872//GO:0003922//GO:0005524//GO:0004070//GO:0004151//GO:0016597	carbamoyl-phosphate synthase (glutamine-hydrolyzing) activity//metal ion binding//GMP synthase (glutamine-hydrolyzing) activity//ATP binding//aspartate carbamoyltransferase activity//dihydroorotase activity//amino acid binding	GO:0005829//GO:0016021//GO:0005739	cytosol//integral component of membrane//mitochondrion
TRINITY_DN32204_c0_g1	6.28804	0.295362	4.4121	0.045652	1	gi|473877647|gb|EMS47882.1|	473877647	38.9	2.44e-21	Protein FAR1-RELATED SEQUENCE 5 [Triticum urartu]	-	-	-	-	-	-	-	-	-	-	-	-	-	-	-	-	-	-	-	-	PF00098.23	zf-CCHC	GO:0006355	regulation of transcription, DNA-templated	GO:0003676//GO:0008270	nucleic acid binding//zinc ion binding	--	--
TRINITY_DN36987_c0_g1	6.25215	0.295362	4.4038	0.046105	1	gi|685872119|ref|XP_009263092.1|	685872119	251	3.04e-83	hypothetical protein FPSE_11700 [Fusarium pseudograminearum CS3096]	gi|699037166|emb|HG970333.1|	699037166	150	6.21e-32	Fusarium graminearum chromosome 2, complete genome	gi|52783246|sp|Q6BNC2.1|RL24_DEBHA	52783246	159	3.27e-48	RecName: Full=60S ribosomal protein L24	Genetic Information Processing	Translation	Ribosome	ko03010	K02896	large subunit ribosomal protein L24e	--	KOG1722	J	60s ribosomal protein L24	PF01246.20	Ribosomal_L24e	--	--	--	--	GO:0005840	ribosome
TRINITY_DN193545_c0_g1	34.8753	1.67924	4.3763	0.005284	1	gi|1027154577|gb|OAG14971.1|	1027154577	277	3.17e-91	hypothetical protein CC77DRAFT_1013520 [Alternaria alternata]	gi|1343453188|gb|CP022028.1|	1343453188	1003	0	Alternaria solani isolate NL03003 chromosome 5, complete sequence	-	-	-	-	-	-	-	-	-	-	-	-	-	-	-	PF10812.8	DUF2561	-	-	-	-	-	-
TRINITY_DN8020_c0_g2	6.9732	0.335848	4.3759	0.032165	1	gi|326525363|dbj|BAK07951.1|	326525363	370	9.39e-117	predicted protein [Hordeum vulgare subsp. vulgare]	gi|702066575|emb|FO905655.1|	702066575	468	1.8e-127	Leptosphaeria biglobosa brassicae b35_scaffold00009 complete sequence	gi|19862963|sp|Q10451.2|PPR5_SCHPO	19862963	93.6	3.34e-20	RecName: Full=Pentatricopeptide repeat-containing protein 5, mitochondrial; Flags: Precursor	-	-	-	-	-	-	-	KOG4197	R	FOG: PPR repeat	PF13812.6	PPR_3	GO:0070130	negative regulation of mitochondrial translation	--	--	GO:0032592	integral component of mitochondrial membrane
TRINITY_DN220096_c0_g1	12.2473	0.590724	4.3738	0.006084	1	gi|695123479|emb|CEG04961.1|	695123479	347	8.53e-119	unnamed protein product [Fusarium sp. FIESC_5 CS3069]	gi|17902241|gb|AF450092.1|AF450092	17902241	411	3.44e-110	Fusarium oxysporum f. sp. lycopersici extracellular matrix protein precursor, gene, complete cds	-	-	-	-	-	-	-	-	-	-	-	-	-	-	-	PF10342.9	GPI-anchored	-	-	-	-	-	-
TRINITY_DN6856_c0_g1	22.3028	1.08162	4.366	0.015095	1	gi|1003744091|gb|KXX79666.1|	1003744091	510	1.18e-175	Subtilisin-like protease 6 [Madurella mycetomatis]	gi|315050473|ref|XM_003174563.1|	315050473	65.8	5.98e-06	Nannizzia gypsea CBS 118893 alkaline proteinase (MGYG_02140), partial mRNA	gi|327488490|sp|D4B5N1.1|SUB9_ARTBC	327488490	253	3.31e-77	RecName: Full=Subtilisin-like protease 9; Flags: Precursor	-	-	-	-	-	-	-	-	-	-	PF15701.5//PF00082.22	DUF4668//Peptidase_S8	GO:0006508	proteolysis	GO:0004252	serine-type endopeptidase activity	--	--
TRINITY_DN85375_c0_g1	6.90412	0.335848	4.3616	0.030788	1	gi|50551807|ref|XP_503378.1|	50551807	132	2.08e-37	YALI0E00594p [Yarrowia lipolytica CLIB122]	-	-	-	-	-	gi|27805763|sp|Q9LFP1.1|VA713_ARATH	27805763	59.7	8.71e-10	RecName: Full=Vesicle-associated membrane protein 713; Short=AtVAMP713	Genetic Information Processing	Folding, sorting and degradation	SNARE interactions in vesicular transport	ko04130	K08513	vesicle-associated membrane protein 4	--	-	-	-	PF00957.21	Synaptobrevin	GO:0006906//GO:0006887//GO:0006897//GO:0006893	vesicle fusion//exocytosis//endocytosis//Golgi to plasma membrane transport	GO:0000149//GO:0005484	SNARE binding//SNAP receptor activity	GO:0032153//GO:0016021//GO:0051285//GO:0030658//GO:0005768//GO:0005802//GO:0031201//GO:0005783	cell division site//integral component of membrane//cell cortex of cell tip//transport vesicle membrane//endosome//trans-Golgi network//SNARE complex//endoplasmic reticulum
TRINITY_DN31975_c0_g1	6.81764	0.335848	4.3434	0.031547	1	gi|296424692|ref|XP_002841881.1|	296424692	165	7.96e-45	hypothetical protein [Tuber melanosporum Mel28]	-	-	-	-	-	-	-	-	-	-	-	-	-	-	-	-	-	-	-	-	PF06687.12//PF09360.10	SUR7//zf-CDGSH	-	-	-	-	-	-
TRINITY_DN38723_c0_g1	6.81656	0.335848	4.3432	0.031557	1	gi|474274450|gb|EMS61036.1|	474274450	120	9.13e-31	hypothetical protein TRIUR3_24149 [Triticum urartu]	-	-	-	-	-	-	-	-	-	-	-	-	-	-	-	-	-	-	-	-	-	-	GO:1901576//GO:0044249//GO:0006807//GO:0044238	organic substance biosynthetic process//cellular biosynthetic process//nitrogen compound metabolic process//primary metabolic process	--	--	--	--
TRINITY_DN75564_c0_g1	6.62219	0.335848	4.3014	0.037025	1	gi|1027160271|gb|OAG20647.1|	1027160271	455	9.7e-156	hypothetical protein CC77DRAFT_1050057 [Alternaria alternata]	gi|1070551125|ref|XM_018527609.1|	1070551125	1591	0	Alternaria alternata hypothetical protein mRNA	-	-	-	-	-	-	-	-	-	-	-	-	-	-	-	-	-	-	-	-	-	-	-
TRINITY_DN221604_c0_g1	47.8491	2.42807	4.3006	0.021244	1	gi|1027153045|gb|OAG13454.1|	1027153045	799	0	4-hydroxyphenylpyruvate dioxygenase [Alternaria alternata]	gi|702073668|emb|FO906015.1|	702073668	669	0	Leptosphaeria maculans lepidii ibcn84_scaffold00009 complete sequence	gi|74876352|sp|Q76NV5.1|HPPD_DICDI	74876352	414	8.52e-142	RecName: Full=4-hydroxyphenylpyruvate dioxygenase; AltName: Full=4-hydroxyphenylpyruvic acid oxidase; Short=4HPPD; Short=HPD; Short=HPPDase	-	-	-	-	-	-	-	KOG0638	E	4-hydroxyphenylpyruvate dioxygenase	PF14696.6//PF00903.25	Glyoxalase_5//Glyoxalase	GO:0098869//GO:0009072//GO:0055114	cellular oxidant detoxification//aromatic amino acid family metabolic process//oxidation-reduction process	GO:0046872//GO:0004601//GO:0003868	metal ion binding//peroxidase activity//4-hydroxyphenylpyruvate dioxygenase activity	--	--
TRINITY_DN30168_c0_g1	6.53732	0.335848	4.2828	0.037907	1	gi|1040527071|gb|OBT64131.1|	1040527071	141	1.31e-35	hypothetical protein VE03_06281 [Pseudogymnoascus sp. 23342-1-I1]	gi|517314787|emb|HF679026.1|	517314787	75	6.76e-09	Fusarium fujikuroi IMI 58289 draft genome, chromosome FFUJ_chr04	-	-	-	-	-	-	-	-	-	-	-	-	-	-	-	-	-	-	-	-	-	-	-
TRINITY_DN161969_c0_g1	6.50089	0.335848	4.2748	0.038295	1	gi|1002218132|gb|KXT13109.1|	1002218132	194	5.76e-62	hypothetical protein AC579_2156 [Pseudocercospora musae]	-	-	-	-	-	gi|75164853|sp|Q949R9.1|MPC1_ARATH	75164853	94	2.78e-24	RecName: Full=Mitochondrial pyruvate carrier 1; Short=AtMPC1	-	-	-	-	-	-	-	KOG1590	S	Uncharacterized conserved protein	PF03650.13	MPC	GO:0006850//GO:1901475	mitochondrial pyruvate transmembrane transport//pyruvate transmembrane transport	GO:0050833	pyruvate transmembrane transporter activity	GO:0031305	integral component of mitochondrial inner membrane
TRINITY_DN35903_c0_g1	12.1592	0.63121	4.2678	0.0032065	1	gi|194476940|ref|YP_002049119.1|	194476940	201	4.34e-59	GDP-mannose pyrophosphorylase (chromatophore) [Paulinella chromatophora]	gi|1638105436|gb|CP040017.1|	1638105436	315	2.38e-81	Massilia umbonata strain DSMZ 26121 chromosome, complete genome	gi|132505|sp|P26404.1|RFBM_SALTY	132505	206	1.63e-62	RecName: Full=Mannose-1-phosphate guanylyltransferase RfbM; AltName: Full=GDP-mannose pyrophosphorylase; Short=GMP; Short=GMPP; AltName: Full=GTP--mannose-1-phosphate guanylyltransferase	-	-	-	-	-	-	-	-	-	-	PF00483.23	NTP_transferase	GO:0071704//GO:0044238	organic substance metabolic process//primary metabolic process	GO:0003824	catalytic activity	--	--
TRINITY_DN63729_c0_g2	6.22274	0.335848	4.2117	0.045965	1	gi|1033919651|gb|OAT01610.1|	1033919651	55.5	3.71e-08	tubulin alpha [Blastomyces dermatitidis ER-3]	gi|927410237|ref|XM_014095488.1|	927410237	117	5.17e-22	Trichoderma virens Gv29-8 hypothetical protein mRNA	gi|135432|sp|P24635.1|TBA_OCTVU	135432	55.8	2.09e-08	RecName: Full=Tubulin alpha chain	-	-	-	-	-	-	-	-	-	-	-	-	-	-	-	-	-	-
TRINITY_DN21803_c0_g1	6.18415	0.335848	4.2027	0.046457	1	gi|296423136|ref|XP_002841111.1|	296423136	286	2.86e-93	hypothetical protein [Tuber melanosporum Mel28]	gi|675324090|gb|CP009078.1|	675324090	145	3.82e-30	Verticillium dahliae JR2 chromosome 5, complete sequence	gi|1730216|sp|P52287.1|GBB3_RAT	1730216	219	1.25e-68	RecName: Full=Guanine nucleotide-binding protein G(I)/G(S)/G(T) subunit beta-3; AltName: Full=Transducin beta chain 3	-	-	-	-	-	-	-	KOG0286	R	G-protein beta subunit	PF00400.32	WD40	GO:0007165	signal transduction	--	--	--	--
TRINITY_DN18328_c0_g1	6.11831	0.335848	4.1873	0.047314	1	gi|700486239|gb|KGO71904.1|	700486239	164	1.6e-48	Cytochrome c oxidase, subunit Vb [Penicillium italicum]	-	-	-	-	-	gi|2493846|sp|P79010.1|COX4_SCHPO	2493846	98.6	9.34e-25	RecName: Full=Cytochrome c oxidase subunit 4, mitochondrial; AltName: Full=Cytochrome c oxidase polypeptide IV; Flags: Precursor	-	-	-	-	-	-	-	KOG3352	C	Cytochrome c oxidase, subunit Vb/COX4	PF01215.19	COX5B	GO:1902600//GO:0009060//GO:0006123	proton transmembrane transport//aerobic respiration//mitochondrial electron transport, cytochrome c to oxygen	GO:0004129//GO:0008270	cytochrome-c oxidase activity//zinc ion binding	GO:0005751	mitochondrial respiratory chain complex IV
TRINITY_DN229648_c0_g1	22.9476	1.26242	4.1841	4.5672e-05	0.20862	gi|549053769|emb|CCX07295.1|	549053769	721	0	Similar to Aldehyde dehydrogenase; acc. no. P40108 [Pyronema omphalodes CBS 100304]	gi|1272998034|emb|LT854261.1|	1272998034	322	3.01e-83	Zymoseptoria tritici ST99CH_1E4 genome assembly, chromosome: ZT1E4_chr_9	gi|118504|sp|P05091.2|ALDH2_HUMAN	118504	554	0	RecName: Full=Aldehyde dehydrogenase, mitochondrial; AltName: Full=ALDH class 2; AltName: Full=ALDH-E2; AltName: Full=ALDHI; Flags: Precursor	Metabolism	Metabolism of terpenoids and polyketides	Limonene and pinene degradation	ko00903	K00128	aldehyde dehydrogenase (NAD+)	1.2.1.3	-	-	-	PF16823.5//PF00171.22	PilZ_2//Aldedh	GO:0055114	oxidation-reduction process	GO:0004029	aldehyde dehydrogenase (NAD) activity	GO:0005829//GO:0005794//GO:0005634	cytosol//Golgi apparatus//nucleus
TRINITY_DN43444_c0_g2	10.612	0.590724	4.1671	0.040151	1	gi|326532218|dbj|BAK01485.1|	326532218	165	3.58e-47	predicted protein [Hordeum vulgare subsp. vulgare]	gi|1149713820|ref|XM_020327355.1|	1149713820	316	3.94e-82	PREDICTED: Aegilops tauschii subsp. tauschii serine/threonine-protein kinase RIPK-like (LOC109768607), mRNA	gi|46890226|sp|Q9LQQ8.1|RLCK7_ARATH	46890226	52.4	2.23e-07	RecName: Full=Probable serine/threonine-protein kinase RLCKVII	-	-	-	-	-	-	-	KOG1187	T	Serine/threonine protein kinase	-	-	GO:0006468	protein phosphorylation	GO:0004672//GO:0005524	protein kinase activity//ATP binding	GO:0009536	plastid
TRINITY_DN34155_c0_g1	12.3046	0.696388	4.1432	0.0027459	1	gi|1022781422|ref|XP_016219248.1|	1022781422	285	6.01e-91	hypothetical protein PV09_00274 [Verruconis gallopava]	gi|827061202|ref|XM_008093988.1|	827061202	289	2.06e-73	Colletotrichum graminicola M1.001 nucleosome assembly protein partial mRNA	gi|75270157|sp|Q53WK4.1|NAP1B_ORYSJ	75270157	114	2.19e-27	RecName: Full=Nucleosome assembly protein 1;2; Short=OsNAP1;2; AltName: Full=Nucleosome assembly protein 1-like 2; Short=OsNAP1_L2; Flags: Precursor	--	--	--	--	K11279	nucleosome assembly protein 1-like 1	--	-	-	-	PF00956.18	NAP	GO:0006334	nucleosome assembly	--	--	GO:0005634	nucleus
TRINITY_DN40580_c0_g1	6.22166	0.36054	4.1091	0.045667	1	gi|116208376|ref|XP_001229997.1|	116208376	587	0	hypothetical protein CHGG_03481 [Chaetomium globosum CBS 148.51]	gi|685405460|ref|XM_009223325.1|	685405460	80.5	1.6e-10	Gaeumannomyces tritici R3-111a-1 hypothetical protein partial mRNA	-	-	-	-	-	-	-	-	-	-	-	-	-	-	-	PF09362.10	DUF1996	-	-	-	-	-	-
TRINITY_DN38051_c0_g1	6.20264	0.36054	4.1047	0.045907	1	gi|474250032|gb|EMS60148.1|	474250032	56.2	1.53e-06	SNF1-related protein kinase regulatory subunit gamma 1 [Triticum urartu]	gi|1371061297|ref|XM_003569230.4|	1371061297	106	1.35e-18	PREDICTED: Brachypodium distachyon SNF1-related protein kinase regulatory subunit gamma-1-like (LOC100828193), transcript variant X2, mRNA	-	-	-	-	-	-	-	-	-	-	-	-	-	-	-	PF10963.8	Phage_TAC_10	-	-	-	-	-	-
TRINITY_DN48598_c1_g3	19.5935	1.18145	4.0517	0.00025948	0.62441	gi|526205024|gb|EPS45191.1|	526205024	158	7.59e-47	hypothetical protein H072_812 [Dactylellina haptotyla CBS 200.50]	gi|1418983321|ref|XM_025532080.1|	1418983321	281	2.09e-71	Aspergillus eucalypticola CBS 122712 60S ribosomal protein L22 (BO83DRAFT_381814), mRNA	gi|54039123|sp|P67985.2|RL22_PIG	54039123	82.8	5.93e-19	RecName: Full=60S ribosomal protein L22; AltName: Full=Heparin-binding protein HBp15	Genetic Information Processing	Translation	Ribosome	ko03010	K02891	large subunit ribosomal protein L22e	--	-	-	-	PF01776.17//PF06758.13	Ribosomal_L22e//Olduvai	GO:0002181	cytoplasmic translation	GO:0003735	structural constituent of ribosome	GO:0005730//GO:0022625	nucleolus//cytosolic large ribosomal subunit
TRINITY_DN13133_c0_g1	28.3665	1.8027	3.976	0.016302	1	gi|347976177|ref|XP_003437418.1|	347976177	344	5.11e-117	uncharacterized protein PODANS_6_9990 [Podospora anserina S mat+]	gi|1494850785|emb|LR026969.1|	1494850785	110	1.67e-19	Podospora comata strain T genome assembly, chromosome: 6	-	-	-	-	-	-	-	-	-	-	-	-	-	-	-	PF14273.6	DUF4360	-	-	-	-	-	-
TRINITY_DN32681_c0_g1	10.7726	0.696388	3.9513	0.0067337	1	gi|296411837|ref|XP_002835636.1|	296411837	60.8	1.45e-07	hypothetical protein [Tuber melanosporum Mel28]	-	-	-	-	-	-	-	-	-	-	-	-	-	-	-	-	-	-	-	-	-	-	-	-	-	-	-	-
TRINITY_DN208003_c0_g1	10.0607	0.671696	3.9048	0.0099189	1	gi|296421828|ref|XP_002840466.1|	296421828	323	1.34e-105	hypothetical protein [Tuber melanosporum Mel28]	-	-	-	-	-	gi|385178679|sp|D4ADY9.1|ELOV7_RAT	385178679	64.3	2.86e-10	RecName: Full=Elongation of very long chain fatty acids protein 7; AltName: Full=3-keto acyl-CoA synthase Elovl7; AltName: Full=ELOVL fatty acid elongase 7; Short=ELOVL FA elongase 7; AltName: Full=Very-long-chain 3-oxoacyl-CoA synthase 7	-	-	-	-	-	-	-	KOG3072	I	Long chain fatty acid elongase	PF01151.18//PF07090.11	ELO//GATase1_like	GO:0006629	lipid metabolic process	--	--	--	--
TRINITY_DN241572_c0_g1	31.9005	2.18899	3.8652	0.01574	1	gi|1027154488|gb|OAG14883.1|	1027154488	711	0	alternative oxidase [Alternaria alternata]	gi|1343453191|gb|CP022031.1|	1343453191	446	1.41e-120	Alternaria solani isolate NL03003 chromosome 8, complete sequence	gi|51701284|sp|Q8J1Z2.1|AOX_GELSS	51701284	348	1.95e-116	RecName: Full=Alternative oxidase, mitochondrial; Flags: Precursor [Gelasinospora sp. S23]	-	-	-	-	-	-	-	-	-	-	PF01786.17	AOX	GO:0055114	oxidation-reduction process	GO:0009916//GO:0046872	alternative oxidase activity//metal ion binding	GO:0016021//GO:0070469	integral component of membrane//respirasome
TRINITY_DN42342_c0_g2	9.41038	0.671696	3.8084	0.014264	1	gi|754377801|gb|KIP10415.1|	754377801	246	3.71e-81	hypothetical protein PHLGIDRAFT_125610 [Phlebiopsis gigantea 11061_1 CR5-6]	gi|1089732909|ref|XM_018846662.1|	1089732909	165	2.06e-36	Isaria fumosorosea ARSEF 2679 Translationally controlled tumor protein (ISF_03056), partial mRNA	gi|549064|sp|P35691.1|TCTP_YEAST	549064	191	3.45e-61	RecName: Full=Translationally-controlled tumor protein homolog; Short=TCTP; AltName: Full=Microtubule and mitochondria-interacting protein 1; AltName: Full=Translation machinery-associated protein 19	-	-	-	-	-	-	-	-	-	-	PF16689.5//PF00838.17	APC_N_CC//TCTP	-	-	-	-	-	-
TRINITY_DN66369_c0_g1	10.0912	0.72108	3.8068	0.0097224	1	gi|12745722|gb|AAK07172.1|	12745722	299	1.06e-101	apocytochrome b, partial (mitochondrion) [Aspergillus japonicus]	gi|1000909|dbj|D63375.1|ASNMTCOBA	1000909	702	0	Aspergillus niger mitochondrial cobA gene for apocytochrome b, complete cds	gi|6014884|sp|O48334.1|CYB_VENIN	6014884	273	2.31e-91	RecName: Full=Cytochrome b; AltName: Full=Complex III subunit 3; AltName: Full=Complex III subunit III; AltName: Full=Cytochrome b-c1 complex subunit 3; AltName: Full=Ubiquinol-cytochrome-c reductase complex cytochrome b subunit	Human Diseases	Neurodegenerative diseases	Huntington's disease	ko05016	K00412	ubiquinol-cytochrome c reductase cytochrome b subunit	--	KOG4663	C	Cytochrome b	PF00033.19	Cytochrome_B	GO:1902600//GO:0006122	proton transmembrane transport//mitochondrial electron transport, ubiquinol to cytochrome c	GO:0008121//GO:0046872//GO:0009055	ubiquinol-cytochrome-c reductase activity//metal ion binding//electron transfer activity	GO:0005750	mitochondrial respiratory chain complex III
TRINITY_DN42374_c0_g1	12.0211	0.886085	3.762	0.0067623	1	gi|440634308|gb|ELR04227.1|	440634308	100	1.05e-24	hypothetical protein GMDG_09003, partial [Pseudogymnoascus destructans 20631-21]	gi|317115299|gb|CP002449.1|	317115299	145	2.62e-30	Alicycliphilus denitrificans BC, complete genome	gi|190359528|sp|A1K8R4.1|IF11_AZOSB	190359528	120	1.93e-34	RecName: Full=Translation initiation factor IF-1 1	-	-	-	-	-	-	-	-	-	-	PF01176.19	eIF-1a	GO:0006413	translational initiation	GO:0003743//GO:0019843//GO:0043022	translation initiation factor activity//rRNA binding//ribosome binding	GO:0009507	chloroplast
TRINITY_DN55128_c2_g1	15.8012	1.18145	3.7414	0.0018843	1	gi|473979015|gb|EMS51495.1|	473979015	265	3.7e-88	hypothetical protein TRIUR3_07777 [Triticum urartu]	gi|13899390|gb|AC079633.9|AC079633	13899390	104	5.38e-18	Genomic Sequence for Oryza sativa, Nipponbare strain, clone OSJNBa0032G08, from Chromosome 3, complete sequence	gi|21264420|sp|O80337.2|EF100_ARATH	21264420	57.4	1.61e-08	RecName: Full=Ethylene-responsive transcription factor 1A; Short=AtERF1A; AltName: Full=Ethylene-responsive element-binding factor 1A; Short=EREBP-1A	--	--	--	--	K09286	EREBP-like factor	--	-	-	-	PF00847.20	AP2	GO:0006355	regulation of transcription, DNA-templated	GO:0003700	DNA-binding transcription factor activity	--	--
TRINITY_DN57706_c0_g1	16.457	1.26242	3.7044	0.0089997	1	gi|218200590|gb|EEC83017.1|	218200590	142	6.46e-38	hypothetical protein OsI_28083 [Oryza sativa Indica Group]	gi|294717827|gb|GQ240784.1|	294717827	383	9.68e-102	Triticum aestivum heat shock protein 90 (Hsp90.2-A1) gene, complete cds	gi|2495365|sp|P55737.1|HS902_ARATH	2495365	132	2.05e-32	RecName: Full=Heat shock protein 90-2; Short=AtHSP90.2; Short=AtHsp90-2; AltName: Full=Heat shock protein 81-2; Short=Hsp81-2; AltName: Full=Protein EARLY-RESPONSIVE TO DEHYDRATION 8; AltName: Full=Protein LOSS OF RECOGNITION OF AVRRPM1 2; AltName: Full=Protein MUTANT SNC1-ENHANCING 12	Human Diseases	Cancers: Specific types	Prostate cancer	ko05215	K04079	molecular chaperone HtpG	--	KOG0019	O	Molecular chaperone (HSP90 family)	PF10712.9//PF00012.20//PF04863.13	NAD-GH//HSP70//EGF_alliinase	GO:0006457//GO:0006950	protein folding//response to stress	GO:0005524//GO:0051082	ATP binding//unfolded protein binding	GO:0005737	cytoplasm
TRINITY_DN43910_c0_g1	7.46852	0.590724	3.6603	0.042422	1	gi|474407023|gb|EMS66527.1|	474407023	112	2.78e-30	hypothetical protein TRIUR3_12548 [Triticum urartu]	gi|1149724081|ref|XM_020332345.1|	1149724081	699	0	PREDICTED: Aegilops tauschii subsp. tauschii uncharacterized LOC109773644 (LOC109773644), mRNA	-	-	-	-	-	-	-	-	-	-	-	-	-	-	-	-	-	-	-	-	-	-	-
TRINITY_DN43150_c0_g1	8.7769	0.696388	3.6557	0.020257	1	gi|937916155|dbj|BAS91074.1|	937916155	66.2	2.48e-10	Os04g0623066, partial [Oryza sativa Japonica Group]	gi|1371098831|ref|XM_003579263.4|	1371098831	132	1.8e-26	PREDICTED: Brachypodium distachyon putative disease resistance protein At3g14460 (LOC100829049), mRNA	-	-	-	-	-	-	-	-	-	-	-	-	-	-	-	-	-	--	--	--	--	GO:0016020	membrane
TRINITY_DN39573_c0_g1	18.3021	1.47681	3.6315	0.045274	1	gi|62733814|gb|AAX95923.1|	62733814	127	2.22e-29	transposon protein, putative, unclassified [Oryza sativa Japonica Group]	-	-	-	-	-	-	-	-	-	-	-	-	-	-	-	-	-	KOG1121	L	Tam3-transposase (Ac family)	-	-	--	--	GO:0003677	DNA binding	--	--
TRINITY_DN157276_c0_g1	8.25379	0.671696	3.6192	0.028292	1	gi|627826076|ref|XP_007685264.1|	627826076	313	1.06e-106	hypothetical protein COCMIDRAFT_87971 [Bipolaris oryzae ATCC 44560]	gi|928520905|ref|XM_014223775.1|	928520905	318	1.62e-82	Bipolaris maydis ATCC 48331 hypothetical protein mRNA	gi|417687|sp|P32388.1|RM49_YEAST	417687	53.5	6.42e-08	RecName: Full=54S ribosomal protein MRP49, mitochondrial	-	-	-	-	-	-	-	-	-	-	PF05047.16	L51_S25_CI-B8	-	-	-	-	-	-
TRINITY_DN47873_c4_g1	11.5611	0.951263	3.6033	0.0089869	1	gi|326497535|dbj|BAK05857.1|	326497535	61.2	4.14e-10	predicted protein [Hordeum vulgare subsp. vulgare]	-	-	-	-	-	-	-	-	-	-	-	-	-	-	-	-	-	-	-	-	-	-	-	-	-	-	-	-
TRINITY_DN31462_c0_g1	7.86743	0.655902	3.5843	0.034418	1	gi|628189419|ref|XP_007708240.1|	628189419	238	3.76e-72	hypothetical protein COCCADRAFT_1711 [Bipolaris zeicola 26-R-13]	gi|1235732157|gb|CP022804.1|	1235732157	486	4.26e-133	Parastagonospora nodorum isolate LDN03-Sn4 chromosome 5, complete sequence	gi|19862941|sp|Q10284.2|HSP75_SCHPO	19862941	152	1.03e-41	RecName: Full=Heat shock protein sks2; AltName: Full=Heat shock cognate protein hsc1	Human Diseases	Infectious diseases: Viral	Epstein-Barr virus infection	ko05169	K03283	heat shock 70kDa protein 1/8	--	KOG0101	O	Molecular chaperones HSP70/HSC70, HSP70 superfamily	PF10712.9//PF00012.20	NAD-GH//HSP70	--	--	GO:0005524	ATP binding	GO:0005829	cytosol
TRINITY_DN131386_c0_g1	8.48081	0.72108	3.556	0.02393	1	gi|549055331|emb|CCX05799.1|	549055331	289	4.09e-94	Similar to Probable endo-beta-1,4-glucanase D; acc. no. A2R5N0 [Pyronema omphalodes CBS 100304]	gi|1418962949|ref|XM_025542549.1|	1418962949	91.6	5.75e-14	Aspergillus heteromorphus CBS 117.55 hypothetical protein (BO70DRAFT_359479), mRNA	gi|408407604|sp|G2Q9T3.1|CEL61_THIHA	408407604	105	2.31e-24	RecName: Full=Polysaccharide monooxygenase Cel61a; AltName: Full=Cellulase-61a; Short=Cel61a; AltName: Full=Endoglucanase-61a; AltName: Full=Glycoside hydrolase-61; Short=GH-61; Flags: Precursor	-	-	-	-	-	-	-	-	-	-	PF03443.14//PF00734.18	Glyco_hydro_61//CBM_1	GO:0005975	carbohydrate metabolic process	GO:0008810//GO:0030248	cellulase activity//cellulose binding	GO:0005576	extracellular region
TRINITY_DN46410_c1_g2	14.794	1.26242	3.5508	0.022581	1	gi|296414483|ref|XP_002836929.1|	296414483	332	2.98e-111	60S ribosomal protein L7 [Tuber melanosporum Mel28]	gi|1419068089|ref|XM_025587911.1|	1419068089	529	1.15e-145	Aspergillus brunneoviolaceus CBS 621.78 60S ribosomal protein L7 (BO95DRAFT_448909), partial mRNA	gi|71649267|sp|Q58DT1.1|RL7_BOVIN	71649267	249	3.27e-80	RecName: Full=60S ribosomal protein L7	Genetic Information Processing	Translation	Ribosome	ko03010	K02937	large subunit ribosomal protein L7e	--	-	-	-	PF08079.12//PF00327.20	Ribosomal_L30_N//Ribosomal_L30	--	--	--	--	GO:0005840	ribosome
TRINITY_DN18487_c0_g1	7.95391	0.696388	3.5137	0.033423	1	gi|1027165226|gb|OAG25594.1|	1027165226	278	1.01e-93	DUF1674-domain-containing protein [Alternaria alternata]	gi|296812638|ref|XM_002846611.1|	296812638	63.9	8.3e-06	Arthroderma otae CBS 113480 conserved hypothetical protein, mRNA	gi|269969406|sp|C6Y4C4.1|SDHF4_SCHPO	269969406	59.3	1.66e-10	RecName: Full=Succinate dehydrogenase assembly factor 4, mitochondrial; Short=SDH assembly factor 4; Short=SDHAF4; Flags: Precursor	-	-	-	-	-	-	-	-	-	-	PF07896.12	DUF1674	GO:0034553	mitochondrial respiratory chain complex II assembly	--	--	GO:0005759	mitochondrial matrix
TRINITY_DN49943_c0_g2	13.3234	1.18145	3.4953	0.010754	1	gi|514760477|ref|XP_004964550.1|	514760477	137	7.9e-33	uncharacterized protein LOC101769334 isoform X1 [Setaria italica]	gi|296837148|gb|GU259650.1|	296837148	141	5.61e-29	Triticum turgidum subsp. dicoccoides cultivar G11 Tsn1 (Tsn1) gene, complete cds	gi|75331134|sp|Q8VYG9.1|PIRL9_ARATH	75331134	50.8	9.68e-06	RecName: Full=Plant intracellular Ras-group-related LRR protein 9	-	-	-	-	-	-	-	-	-	-	PF13855.6	LRR_8	-	-	-	-	-	-
TRINITY_DN38545_c0_g1	7.80051	0.696388	3.4856	0.034631	1	gi|222612682|gb|EEE50814.1|	222612682	166	8.34e-49	hypothetical protein OsJ_31208 [Oryza sativa Japonica Group]	-	-	-	-	-	-	-	-	-	-	-	-	-	-	-	-	-	-	-	-	-	-	-	-	-	-	-	-
TRINITY_DN3040_c0_g1	26.1616	2.35094	3.4761	0.025611	1	gi|189195100|ref|XP_001933888.1|	189195100	455	5.21e-161	glutathione S-transferase [Pyrenophora tritici-repentis Pt-1C-BFP]	gi|401665844|gb|JX144688.1|	401665844	211	3.58e-50	Alternaria sp. 1 SD-2012 clone RCCRMSF6PKS polyketide synthase gene, partial cds	gi|29428020|sp|Q9N4X8.3|GSTPA_CAEEL	29428020	54.7	1.12e-07	RecName: Full=Glutathione S-transferase P 10; AltName: Full=GST 5.4; AltName: Full=GST class-pi; AltName: Full=GSTP2-2	-	-	-	-	-	-	-	KOG1695	O	Glutathione S-transferase	PF14497.6	GST_C_3	--	--	GO:0016740	transferase activity	--	--
TRINITY_DN40817_c0_g1	10.4074	0.967058	3.4279	0.015475	1	gi|296414850|ref|XP_002837110.1|	296414850	102	1.37e-25	hypothetical protein [Tuber melanosporum Mel28]	-	-	-	-	-	gi|114154876|sp|Q3E756.1|YB029_YEAST	114154876	49.7	6.41e-07	RecName: Full=UPF0768 protein YBL029C-A	-	-	-	-	-	-	-	-	-	-	PF17032.5	zinc_ribbon_15	-	-	-	-	-	-
TRINITY_DN241466_c0_g1	7.20184	0.671696	3.4225	0.048994	1	gi|296414702|ref|XP_002837036.1|	296414702	70.9	9.38e-12	hypothetical protein [Tuber melanosporum Mel28]	-	-	-	-	-	-	-	-	-	-	-	-	-	-	-	-	-	-	-	-	PF01284.23	MARVEL	-	-	-	-	-	-
TRINITY_DN39193_c0_g1	9.88053	0.926572	3.4146	0.021257	1	gi|1060923289|gb|ODM18588.1|	1060923289	190	9.98e-62	hypothetical protein SI65_05205 [Aspergillus cristatus]	gi|211583076|emb|AM920428.1|	211583076	117	3.27e-22	Penicillium chrysogenum Wisconsin 54-1255 complete genome, contig Pc00c13	gi|1351363|sp|P49346.1|QCR8_KLULA	1351363	74.3	2.79e-17	RecName: Full=Cytochrome b-c1 complex subunit 8; AltName: Full=Complex III subunit 8; AltName: Full=Complex III subunit VII; AltName: Full=Ubiquinol-cytochrome c reductase complex 11 kDa protein; AltName: Full=Ubiquinol-cytochrome c reductase complex ubiquinone-binding protein QP-C	Human Diseases	Neurodegenerative diseases	Huntington's disease	ko05016	K00418	ubiquinol-cytochrome c reductase subunit 8	--	-	-	-	PF02939.16	UcrQ	GO:1902600//GO:0006122//GO:0009060	proton transmembrane transport//mitochondrial electron transport, ubiquinol to cytochrome c//aerobic respiration	GO:0008121	ubiquinol-cytochrome-c reductase activity	GO:0005750	mitochondrial respiratory chain complex III
TRINITY_DN52276_c1_g1	12.4559	1.18145	3.3982	0.0098218	1	gi|394997085|gb|AFN44008.1|	394997085	285	1.38e-93	WRKY79 transcription factor [Triticum aestivum]	gi|1149801994|ref|XM_020305691.1|	1149801994	590	3.42e-164	PREDICTED: Aegilops tauschii subsp. tauschii WRKY transcription factor WRKY28-like (LOC109746573), partial mRNA	gi|29839650|sp|Q9LXG8.1|WRK72_ARATH	29839650	100	1.12e-22	RecName: Full=Probable WRKY transcription factor 72; AltName: Full=WRKY DNA-binding protein 72	-	-	-	-	-	-	-	-	-	-	PF03106.15	WRKY	GO:0006355	regulation of transcription, DNA-templated	GO:0043565//GO:0003700	sequence-specific DNA binding//DNA-binding transcription factor activity	--	--
TRINITY_DN211637_c0_g1	14.0749	1.34339	3.3892	0.0042782	1	gi|835951583|ref|XP_004961081.2|	835951583	77.4	1.97e-12	uncharacterized protein LOC101754965 isoform X1 [Setaria italica]	gi|1256418852|ref|XM_004961024.3|	1256418852	680	0	PREDICTED: Setaria italica uncharacterized LOC101754965 (LOC101754965), transcript variant X1, mRNA	-	-	-	-	-	-	-	-	-	-	-	-	-	-	-	PF01456.17	Mucin	-	-	-	-	-	-
TRINITY_DN27672_c0_g1	10.476	1.00754	3.3782	0.015117	1	gi|296424692|ref|XP_002841881.1|	296424692	102	3.83e-22	hypothetical protein [Tuber melanosporum Mel28]	-	-	-	-	-	-	-	-	-	-	-	-	-	-	-	-	-	-	-	-	PF06687.12	SUR7	-	-	-	-	-	-
TRINITY_DN44194_c1_g1	17.0328	1.67924	3.3424	0.0017238	1	gi|549051577|emb|CCX09459.1|	549051577	168	7.93e-51	Similar to 60S ribosomal protein L30-1; acc. no. P52808 [Pyronema omphalodes CBS 100304]	gi|928519029|ref|XM_014222837.1|	928519029	161	3.11e-35	Bipolaris maydis ATCC 48331 hypothetical protein mRNA	gi|730563|sp|P38664.2|RL30_KLULA	730563	131	6.71e-38	RecName: Full=60S ribosomal protein L30; AltName: Full=L32	Genetic Information Processing	Translation	Ribosome	ko03010	K02908	large subunit ribosomal protein L30e	--	-	-	-	PF01248.26	Ribosomal_L7Ae	GO:0006412//GO:0006364//GO:0048025	translation//rRNA processing//negative regulation of mRNA splicing, via spliceosome	GO:0030627//GO:0003735	pre-mRNA 5'-splice site binding//structural constituent of ribosome	GO:0005840	ribosome
TRINITY_DN8238_c0_g1	19.1685	1.89363	3.3395	0.0010415	1	gi|261206394|ref|XP_002627934.1|	261206394	859	0	5-methyltetrahydropteroyltriglutamate-homocysteine methyltransferase [Blastomyces gilchristii SLH14081]	gi|1022792111|ref|XM_016356881.1|	1022792111	316	1.58e-81	Verruconis gallopava 5-methyltetrahydropteroyltriglutamate-homocysteine S-methyltransferase mRNA	gi|123396617|sp|Q21N29.1|METE_SACD2	123396617	606	0	RecName: Full=5-methyltetrahydropteroyltriglutamate--homocysteine methyltransferase; AltName: Full=Cobalamin-independent methionine synthase; AltName: Full=Methionine synthase, vitamin-B12 independent isozyme	Metabolism	Global and overview maps	Biosynthesis of amino acids	ko01230	K00549	5-methyltetrahydropteroyltriglutamate--homocysteine methyltransferase	2.1.1.14	-	-	-	PF08267.12//PF01717.18//PF14141.6	Meth_synt_1//Meth_synt_2//YqzM	GO:0032259//GO:0046084//GO:0019280	methylation//adenine biosynthetic process//L-methionine biosynthetic process from homoserine via O-acetyl-L-homoserine and cystathionine	GO:0008270//GO:0003871	zinc ion binding//5-methyltetrahydropteroyltriglutamate-homocysteine S-methyltransferase activity	GO:0005829//GO:0005634	cytosol//nucleus
TRINITY_DN128047_c0_g1	7.18443	0.72108	3.3166	0.048643	1	gi|296410844|ref|XP_002835145.1|	296410844	348	4.4e-121	hypothetical protein [Tuber melanosporum Mel28]	-	-	-	-	-	gi|47606457|sp|P61585.1|RHOA_BOVIN	47606457	283	5.69e-97	RecName: Full=Transforming protein RhoA; AltName: Full=Gb; AltName: Full=p21; Flags: Precursor	Human Diseases	Cancers: Specific types	Colorectal cancer	ko05210	K04513	Ras homolog gene family, member A	--	-	-	-	PF00071.22	Ras	GO:0007264	small GTPase mediated signal transduction	GO:0005525	GTP binding	GO:0005622	intracellular
TRINITY_DN193222_c0_g1	9.93004	1.00754	3.301	0.028719	1	gi|296421084|ref|XP_002840096.1|	296421084	265	2.19e-81	hypothetical protein [Tuber melanosporum Mel28]	-	-	-	-	-	gi|1723783|sp|P53334.1|SCW4_YEAST	1723783	145	4.05e-39	RecName: Full=Probable family 17 glucosidase SCW4; AltName: Full=Soluble cell wall protein 4; Flags: Precursor	-	-	-	-	-	-	-	-	-	-	-	-	GO:0006810	transport	--	--	--	--
TRINITY_DN97587_c0_g1	11.9464	1.22193	3.2893	0.021933	1	gi|1027163619|gb|OAG23989.1|	1027163619	225	5.62e-74	hypothetical protein CC77DRAFT_1006190 [Alternaria alternata]	gi|1343453184|gb|CP022024.1|	1343453184	536	3.56e-148	Alternaria solani isolate NL03003 chromosome 1, complete sequence	-	-	-	-	-	-	-	-	-	-	-	-	-	-	-	-	-	-	-	-	-	-	-
TRINITY_DN55054_c1_g2	55.9025	5.74607	3.2823	1.0718e-07	0.0021449	gi|549051489|emb|CCX09532.1|	549051489	253	9.19e-82	Similar to Woronin body major protein; acc. no. P87252 [Pyronema omphalodes CBS 100304]	gi|189191745|ref|XM_001932177.1|	189191745	215	3.12e-51	Pyrenophora tritici-repentis Pt-1C-BFP woronin body major protein, mRNA	gi|20138705|sp|Q9AXQ3.1|IF5A4_SOLLC	20138705	49.3	5.39e-06	RecName: Full=Eukaryotic translation initiation factor 5A-4; Short=eIF-5A-4	-	-	-	-	-	-	-	KOG3271	J	Translation initiation factor 5A (eIF-5A)	PF01287.20	eIF-5a	GO:0006413//GO:0006452//GO:0045905//GO:0045901	translational initiation//translational frameshifting//positive regulation of translational termination//positive regulation of translational elongation	GO:0003743//GO:0003746//GO:0043022	translation initiation factor activity//translation elongation factor activity//ribosome binding	--	--
TRINITY_DN52044_c1_g2	26.451	2.76392	3.2585	0.0074854	1	gi|549055549|emb|CCX05686.1|	549055549	236	2.24e-76	Similar to 60S ribosomal protein L27-A; acc. no. O14388 [Pyronema omphalodes CBS 100304]	gi|321250507|ref|XM_003191784.1|	321250507	185	2.18e-42	Cryptococcus gattii WM276 60s ribosomal protein l27, putative partial mRNA	gi|62901064|sp|Q9XSU7.3|RL27_CANFA	62901064	151	8.92e-45	RecName: Full=60S ribosomal protein L27	Genetic Information Processing	Translation	Ribosome	ko03010	K02901	large subunit ribosomal protein L27e	--	-	-	-	PF01777.18	Ribosomal_L27e	GO:0006412	translation	GO:0003735	structural constituent of ribosome	GO:0022625	cytosolic large ribosomal subunit
TRINITY_DN31602_c0_g1	17.2272	1.8027	3.2565	0.0014732	1	gi|1023262386|gb|KZT57632.1|	1023262386	132	5.34e-34	hypothetical protein CALCODRAFT_452709 [Calocera cornea HHB12733]	-	-	-	-	-	gi|939319562|sp|D4B2H3.1|ALL7_ARTBC	939319562	57.4	4.11e-08	RecName: Full=Allergen Asp f 7 homolog; Flags: Precursor	-	-	-	-	-	-	-	-	-	-	PF03330.18	DPBB_1	-	-	-	-	-	-
TRINITY_DN48517_c1_g1	72.438	7.67941	3.2377	1.0003e-05	0.067626	gi|326518118|dbj|BAK07311.1|	326518118	82	4.18e-17	predicted protein [Hordeum vulgare subsp. vulgare]	gi|1251756734|dbj|AK455267.1|	1251756734	643	3.08e-180	Triticum aestivum mRNA, clone: tplb0008j06, cultivar Chinese Spring	-	-	-	-	-	-	-	-	-	-	-	-	-	-	-	PF06640.11	P_C	-	-	-	-	-	-
TRINITY_DN37883_c0_g1	121.765	12.9361	3.2346	0.034647	1	gi|1027158047|gb|OAG18428.1|	1027158047	450	3.03e-159	endo-1,4-beta-xylanase B precursor [Alternaria alternata]	gi|628065305|ref|XM_007699586.1|	628065305	425	1.31e-114	Bipolaris sorokiniana ND90Pr glycoside hydrolase family 11 protein mRNA	gi|74668470|sp|Q4WG11.1|XYNA_ASPFU	74668470	157	1.44e-45	RecName: Full=Endo-1,4-beta-xylanase xynf11a; Short=Xylanase xynf11a; AltName: Full=1,4-beta-D-xylan xylanohydrolase xynf11a; Flags: Precursor	-	-	-	-	-	-	-	-	-	-	PF00457.17	Glyco_hydro_11	GO:0045493	xylan catabolic process	GO:0031176	endo-1,4-beta-xylanase activity	--	--
TRINITY_DN224347_c0_g1	9.0931	0.967058	3.2331	0.030221	1	gi|326498049|dbj|BAJ94887.1|	326498049	616	0	predicted protein [Hordeum vulgare subsp. vulgare]	gi|1435127261|ref|XM_025946035.1|	1435127261	226	1.46e-54	PREDICTED: Panicum hallii potassium transporter 22-like (LOC112881380), mRNA	gi|75161297|sp|Q8VXB1.1|HAK12_ORYSJ	75161297	184	2.98e-51	RecName: Full=Putative potassium transporter 12; AltName: Full=OsHAK12	--	--	--	--	K03549	KUP system potassium uptake protein	--	-	-	-	PF02705.16	K_trans	GO:0071805	potassium ion transmembrane transport	GO:0015079	potassium ion transmembrane transporter activity	GO:0016021	integral component of membrane
TRINITY_DN38678_c0_g1	14.2666	1.5173	3.2331	0.0064166	1	gi|225561574|gb|EEH09854.1|	225561574	154	4.04e-40	conserved hypothetical protein [Histoplasma capsulatum G186AR]	gi|517314787|emb|HF679026.1|	517314787	73.1	2.95e-08	Fusarium fujikuroi IMI 58289 draft genome, chromosome FFUJ_chr04	-	-	-	-	-	-	-	-	-	-	-	-	-	-	-	-	-	-	-	-	-	-	-
TRINITY_DN67071_c0_g1	9.8642	1.05693	3.2223	0.020758	1	gi|1027163905|gb|OAG24274.1|	1027163905	613	0	heme peroxidase [Alternaria alternata]	gi|1343453184|gb|CP022024.1|	1343453184	300	9.64e-77	Alternaria solani isolate NL03003 chromosome 1, complete sequence	gi|1708819|sp|P50622.1|LIG6_PHACH	1708819	103	1.77e-23	RecName: Full=Ligninase LG6; AltName: Full=Diarylpropane peroxidase; AltName: Full=Lignin peroxidase; Flags: Precursor	-	-	-	-	-	-	-	-	-	-	PF00141.23	peroxidase	GO:0098869//GO:0055114//GO:0006979	cellular oxidant detoxification//oxidation-reduction process//response to oxidative stress	GO:0020037//GO:0046872//GO:0004601	heme binding//metal ion binding//peroxidase activity	--	--
TRINITY_DN173928_c0_g1	27.7753	2.9941	3.2136	0.034254	1	gi|1027165276|gb|OAG25643.1|	1027165276	1190	0	alkaline phosphatase-like protein [Alternaria alternata]	gi|667828727|ref|XM_007780343.1|	667828727	274	9.17e-69	Coniosporium apollinis CBS 100218 hypothetical protein partial mRNA	gi|6093774|sp|Q92058.1|PPBT_CHICK	6093774	122	2.09e-28	RecName: Full=Alkaline phosphatase, tissue-nonspecific isozyme; Short=AP-TNAP; Short=TNSALP; Flags: Precursor	-	-	-	-	-	-	-	KOG4126	P	Alkaline phosphatase	PF00245.20	Alk_phosphatase	GO:0016311	dephosphorylation	GO:0016791	phosphatase activity	--	--
TRINITY_DN10212_c0_g1	80.7436	8.73205	3.209	0.024926	1	gi|1027162705|gb|OAG23076.1|	1027162705	573	0	the polygalacturonase [Alternaria alternata]	gi|1248266021|ref|XM_022619121.1|	1248266021	436	8.05e-118	Colletotrichum orchidophilum endopolygalacturonase 1 (CORC01_07485), partial mRNA	gi|7388012|sp|Q9Y833.1|PGLR2_PENOL	7388012	353	3.1e-118	RecName: Full=Polygalacturonase 2; Short=PG 2; AltName: Full=Pectinase 2; Flags: Precursor [Penicillium olsonii]	-	-	-	-	-	-	-	-	-	-	PF00295.17	Glyco_hydro_28	GO:0005975//GO:0071555	carbohydrate metabolic process//cell wall organization	GO:0004650	polygalacturonase activity	GO:0005576	extracellular region
TRINITY_DN38664_c0_g1	19.6609	2.13855	3.2006	0.00082634	1	gi|701777754|gb|KGQ11425.1|	701777754	154	6.62e-40	30S ribosomal protein S1 [Beauveria bassiana D1-5]	gi|1274761489|gb|CP024608.1|	1274761489	586	5.53e-163	Massilia violaceinigra strain B2 chromosome	gi|81564498|sp|Q6NDP1.1|RS1_RHOPA	81564498	102	8.39e-23	RecName: Full=30S ribosomal protein S1; AltName: Full=RRP-S1	Genetic Information Processing	Translation	Ribosome	ko03010	K02945	small subunit ribosomal protein S1	--	-	-	-	PF00575.23	S1	--	--	GO:0003676	nucleic acid binding	--	--
TRINITY_DN100647_c0_g1	15.2537	1.67924	3.1833	0.039261	1	gi|1027165103|gb|OAG25471.1|	1027165103	613	0	DNA-directed RNA polymerase subunit D [Alternaria alternata]	gi|1089685913|ref|XM_018833719.1|	1089685913	84.2	1.22e-11	Fonsecaea erecta DNA-directed RNA polymerase II subunit C (AYL99_02203), partial mRNA	gi|121731854|sp|Q2NFZ6.1|RPOD_METST	121731854	121	1.79e-30	RecName: Full=DNA-directed RNA polymerase subunit D	Human Diseases	Infectious diseases: Viral	Epstein-Barr virus infection	ko05169	K03011	DNA-directed RNA polymerase II subunit RPB3	--	-	-	-	PF01193.24//PF01000.26	RNA_pol_L//RNA_pol_A_bac	GO:0006369//GO:0001172	termination of RNA polymerase II transcription//transcription, RNA-templated	GO:0003899//GO:0003677//GO:0046983	DNA-directed 5'-3' RNA polymerase activity//DNA binding//protein dimerization activity	GO:0005829//GO:0005665	cytosol//RNA polymerase II, core complex
TRINITY_DN63_c0_g1	41.5375	4.6209	3.1682	3.4708e-05	0.17599	gi|1027153304|gb|OAG13709.1|	1027153304	204	2.36e-51	FAD/NAD(P)-binding domain-containing protein [Alternaria alternata]	gi|918822323|ref|XM_013574126.1|	918822323	73.1	5.99e-08	Aureobasidium namibiae CBS 147.97 FAD/NAD(P)-binding domain-containing protein partial mRNA	gi|189081404|sp|A9M9H8.1|BETA_BRUC2	189081404	97.1	1.92e-19	RecName: Full=Oxygen-dependent choline dehydrogenase; Short=CDH; Short=CHD; AltName: Full=Betaine aldehyde dehydrogenase; Short=BADH	-	-	-	-	-	-	-	KOG1238	R	Glucose dehydrogenase/choline dehydrogenase/mandelonitrile lyase (GMC oxidoreductase family)	PF16010.5//PF00732.19//PF05199.13//PF00734.18//PF17302.2//PF08999.10	CDH-cyt//GMC_oxred_N//GMC_oxred_C//CBM_1//DUF5351//SP_C-Propep	GO:0005975//GO:0055114	carbohydrate metabolic process//oxidation-reduction process	GO:0004553//GO:0050660//GO:0016614//GO:0030248	hydrolase activity, hydrolyzing O-glycosyl compounds//flavin adenine dinucleotide binding//oxidoreductase activity, acting on CH-OH group of donors//cellulose binding	GO:0005576	extracellular region
TRINITY_DN199588_c0_g1	9.42779	1.05693	3.157	0.025093	1	gi|682458271|gb|KFZ15531.1|	682458271	90.5	7.23e-19	hypothetical protein V502_05552 [Pseudogymnoascus sp. VKM F-4520 (FW-2644)]	-	-	-	-	-	gi|74855349|sp|Q54TM6.1|GTAI_DICDI	74855349	61.2	8.4e-09	RecName: Full=GATA zinc finger domain-containing protein 9	-	-	-	-	-	-	-	KOG1601	K	GATA-4/5/6 transcription factors	PF00320.27	GATA	GO:0006355	regulation of transcription, DNA-templated	GO:0043565//GO:0003700//GO:0008270	sequence-specific DNA binding//DNA-binding transcription factor activity//zinc ion binding	--	--
TRINITY_DN45885_c0_g1	57.2049	6.4147	3.1567	8.9169e-07	0.01266	gi|1028521675|gb|OAI97115.1|	1028521675	148	4.39e-40	hypothetical protein A4X03_g9492 [Tilletia caries]	-	-	-	-	-	-	-	-	-	-	-	-	-	-	-	-	-	-	-	-	PF00978.21	RdRP_2	-	-	-	-	-	-
TRINITY_DN202304_c0_g1	8.93354	1.00754	3.1484	0.034182	1	gi|1027162494|gb|OAG22866.1|	1027162494	209	2.05e-67	long chronological lifespan protein 2 [Alternaria alternata]	gi|1343453185|gb|CP022025.1|	1343453185	387	3.85e-103	Alternaria solani isolate NL03003 chromosome 2, complete sequence	gi|334350897|sp|A2QUM3.1|LCL2_ASPNC	334350897	120	5.09e-34	RecName: Full=Long chronological lifespan protein 2; Flags: Precursor	-	-	-	-	-	-	-	-	-	-	-	-	GO:0030433	ubiquitin-dependent ERAD pathway	--	--	--	--
TRINITY_DN43609_c0_g1	36.1455	4.08262	3.1462	0.027987	1	gi|1027154501|gb|OAG14896.1|	1027154501	1024	0	ammonium transporter-like protein [Alternaria alternata]	gi|169600858|ref|XM_001793800.1|	169600858	1513	0	Parastagonospora nodorum SN15 hypothetical protein (SNOG_03282), partial mRNA	gi|3334419|sp|O26757.1|Y661_METTH	3334419	198	3.13e-56	RecName: Full=Putative ammonium transporter MTH_661	--	--	--	--	K03320	ammonium transporter, Amt family	--	KOG0682	P	Ammonia permease	PF00909.21	Ammonium_transp	GO:0072488//GO:0015695//GO:0019740	ammonium transmembrane transport//organic cation transport//nitrogen utilization	GO:0008519	ammonium transmembrane transporter activity	GO:0005887	integral component of plasma membrane
TRINITY_DN36143_c0_g1	17.3926	1.9746	3.1388	0.0077822	1	gi|296420194|ref|XP_002839660.1|	296420194	139	1.56e-33	hypothetical protein [Tuber melanosporum Mel28]	-	-	-	-	-	-	-	-	-	-	-	-	-	-	-	-	-	-	-	-	PF14613.6	DUF4449	-	-	-	-	-	-
TRINITY_DN35587_c0_g1	8.49821	0.967058	3.1355	0.041492	1	gi|701780196|gb|KGQ13535.1|	701780196	510	8.2e-167	3D-(3,5/4)-trihydroxycyclohexane-1,2-dione hydrolas e [Beauveria bassiana D1-5]	gi|684194542|gb|CP009365.1|	684194542	1480	0	Pseudomonas soli strain SJ10, complete genome	gi|81786569|sp|Q9KAH5.1|IOLA_BACHD	81786569	412	2.48e-138	RecName: Full=Methylmalonate semialdehyde dehydrogenase [acylating]; Short=MMSA dehydrogenase; Short=MMSDH; Short=MSDH; AltName: Full=Malonate semialdehyde dehydrogenase [acetylating]; Short=MSA dehydrogenase	-	-	-	-	-	-	-	KOG2449	EG	Methylmalonate semialdehyde dehydrogenase	PF00202.21//PF00171.22	Aminotran_3//Aldedh	--	--	GO:0046872//GO:0016620	metal ion binding//oxidoreductase activity, acting on the aldehyde or oxo group of donors, NAD or NADP as acceptor	GO:0044710
TRINITY_DN54486_c0_g11	8.48027	0.967058	3.1324	0.041639	1	gi|474045400|gb|EMS53444.1|	474045400	95.5	2.67e-20	hypothetical protein TRIUR3_08227 [Triticum urartu]	gi|409102450|emb|HE996878.1|	409102450	111	3.44e-20	Triticum aestivum cv. Arina SNP, chromosome 3B, clone Taes_arina_ctg_77395	-	-	-	-	-	-	-	-	-	-	-	-	-	-	-	-	-	-	-	-	-	-	-
TRINITY_DN38775_c0_g1	32.181	3.67164	3.1317	4.151e-05	0.20322	gi|1029191073|gb|OAL55632.1|	1029191073	337	2.9e-111	pectate lyase-like protein [Pyrenochaeta sp. DS3sAY3a]	-	-	-	-	-	gi|121938270|sp|Q2TZY0.1|PLYB_ASPOR	121938270	250	6.17e-79	RecName: Full=Probable pectate lyase B; Flags: Precursor	Metabolism	Carbohydrate metabolism	Pentose and glucuronate interconversions	ko00040	K01728	pectate lyase	4.2.2.2	-	-	-	PF06967.11//PF00711.19//PF00544.19	Mo-nitro_C//Defensin_beta//Pec_lyase_C	GO:0000272	polysaccharide catabolic process	GO:0016829	lyase activity	GO:0005576	extracellular region
TRINITY_DN40525_c0_g1	14.0015	1.63875	3.0949	0.0072359	1	gi|1028520370|gb|OAI96498.1|	1028520370	150	4.92e-40	hypothetical protein A4X06_g9439, partial [Tilletia controversa]	-	-	-	-	-	gi|139136|sp|P15095.1|RDRP_NMV	139136	52.8	8e-07	RecName: Full=RNA replication protein; AltName: Full=186 kDa protein; AltName: Full=ORF1 protein; Includes: RecName: Full=RNA-directed RNA polymerase; Includes: RecName: Full=Helicase	-	-	-	-	-	-	-	-	-	-	PF01660.17	Vmethyltransf	-	-	-	-	-	-
TRINITY_DN48001_c1_g3	26.9875	3.19654	3.0777	0.0002208	0.56094	gi|549046901|emb|CCX13681.1|	549046901	250	1.88e-82	Similar to 40S ribosomal protein S19; acc. no. P27073 [Pyronema omphalodes CBS 100304]	gi|1383874854|ref|XM_024847821.1|	1383874854	239	1.51e-58	Aspergillus steynii IBT 23096 40S ribosomal protein S19 (P170DRAFT_428049), partial mRNA	gi|133857|sp|P17074.3|RS19_RAT	133857	156	7.99e-47	RecName: Full=40S ribosomal protein S19	Genetic Information Processing	Translation	Ribosome	ko03010	K02966	small subunit ribosomal protein S19e	--	-	-	-	PF01090.19	Ribosomal_S19e	GO:0006412	translation	GO:0003735	structural constituent of ribosome	GO:0005840	ribosome
TRINITY_DN39062_c0_g1	16.5089	1.9746	3.0636	0.0034874	1	gi|549056862|emb|CCX04423.1|	549056862	365	8.66e-122	Similar to L-xylulose reductase; acc. no. Q8NK50 [Pyronema omphalodes CBS 100304]	gi|573984804|ref|XM_006670260.1|	573984804	180	1.6e-40	Cordyceps militaris CM01 Short-chain dehydrogenase/reductase SDR (CCM_05114), partial mRNA	gi|118595439|sp|P0C0Y4.2|MTDH_ALTAL	118595439	174	5.91e-50	RecName: Full=Probable NADP-dependent mannitol dehydrogenase; Short=MtDH; AltName: Full=Mannitol 2-dehydrogenase [NADP(+)]; AltName: Allergen=Alt a 8 [Alternaria alternata]	-	-	-	-	-	-	-	-	-	-	PF13561.6	adh_short_C2	GO:0055114	oxidation-reduction process	GO:0016491	oxidoreductase activity	--	--
TRINITY_DN42382_c1_g1	20.3496	2.44387	3.0578	0.0046315	1	gi|357129682|ref|XP_003566490.1|	357129682	196	1.6e-61	putative ripening-related protein 6 [Brachypodium distachyon]	gi|1205921130|ref|XM_002464406.2|	1205921130	80.5	8.02e-11	PREDICTED: Sorghum bicolor ripening-related protein 3 (LOC8067116), mRNA	gi|75172898|sp|Q9FWT5.1|RIP3_ORYSJ	75172898	92	1.26e-21	RecName: Full=Ripening-related protein 3; Flags: Precursor	-	-	-	-	-	-	-	-	-	-	-	-	-	-	-	-	-	-
TRINITY_DN37793_c0_g1	9.82777	1.18145	3.0563	0.03478	1	gi|944073465|gb|KQK08949.1|	944073465	63.2	1.12e-07	hypothetical protein BRADI_2g45041v3 [Brachypodium distachyon]	-	-	-	-	-	-	-	-	-	-	-	-	-	-	-	-	-	-	-	-	PF03004.14	Transposase_24	-	-	-	-	-	-
TRINITY_DN48533_c1_g2	86.1815	10.5706	3.0273	0.031498	1	gi|669027084|emb|CDM80288.1|	669027084	1139	0	unnamed protein product [Triticum aestivum]	gi|955721918|ref|XM_014805529.1|	955721918	1572	0	PREDICTED: Setaria italica beta-fructofuranosidase, insoluble isoenzyme 3 (LOC101768855), mRNA	gi|122180158|sp|Q1PEF8.1|INV2_ARATH	122180158	662	0	RecName: Full=Beta-fructofuranosidase, insoluble isoenzyme CWINV2; AltName: Full=Cell wall beta-fructosidase 2; Short=AtbetaFRUCT2; AltName: Full=Cell wall invertase 2; Short=AtcwINV2; AltName: Full=Sucrose hydrolase 2; Flags: Precursor	Metabolism	Carbohydrate metabolism	Starch and sucrose metabolism	ko00500	K01193	beta-fructofuranosidase	3.2.1.26	KOG0228	G	Beta-fructofuranosidase (invertase)	PF00251.20//PF08244.12	Glyco_hydro_32N//Glyco_hydro_32C	GO:0005975	carbohydrate metabolic process	GO:0004575	sucrose alpha-glucosidase activity	--	--
TRINITY_DN58779_c3_g1	11.5116	1.41747	3.0217	0.015054	1	gi|326492786|dbj|BAJ90249.1|	326492786	162	7.72e-43	predicted protein [Hordeum vulgare subsp. vulgare]	gi|1371077153|ref|XM_010236319.3|	1371077153	302	1.92e-77	PREDICTED: Brachypodium distachyon chloroplastic group IIA intron splicing facilitator CRS1, chloroplastic (LOC100828512), transcript variant X1, mRNA	gi|75173308|sp|Q9FYT6.1|CRS1_MAIZE	75173308	105	3.24e-24	RecName: Full=Chloroplastic group IIA intron splicing facilitator CRS1, chloroplastic; AltName: Full=Chloroplastic RNA splicing factor 1; AltName: Full=Protein CHLOROPLAST RNA SPLICING 1; Flags: Precursor	-	-	-	-	-	-	-	KOG1990	L	Poly(A)-specific exoribonuclease PARN	PF01985.21	CRS1_YhbY	GO:0000373	Group II intron splicing	GO:0003723	RNA binding	GO:0009507	chloroplast
TRINITY_DN16654_c0_g1	10.2452	1.26242	3.0207	0.036526	1	gi|1063866004|ref|XP_018004850.1|	1063866004	70.1	2.5e-11	hypothetical protein AB675_2568 [Phialophora attae]	-	-	-	-	-	-	-	-	-	-	-	-	-	-	-	-	-	-	-	-	PF10342.9	GPI-anchored	-	-	-	-	-	-
TRINITY_DN38099_c0_g1	14.7699	1.83735	3.007	0.0083852	1	gi|357132320|ref|XP_003567778.1|	357132320	83.2	5.1e-17	sm-like protein LSM8 [Brachypodium distachyon]	-	-	-	-	-	gi|121962459|sp|Q1ZXD5.1|LSM8_DICDI	121962459	50.4	8.28e-07	RecName: Full=Probable U6 snRNA-associated Sm-like protein LSm8	-	-	-	-	-	-	-	KOG1784	A	Small Nuclear ribonucleoprotein splicing factor	PF01423.22	LSM	GO:0000398	mRNA splicing, via spliceosome	GO:0003723	RNA binding	GO:0046540	U4/U6 x U5 tri-snRNP complex
TRINITY_DN49714_c4_g1	17.8732	2.26307	2.9815	0.0030238	1	gi|960491885|ref|XP_014751160.1|	960491885	87.4	5.16e-16	uncharacterized protein LOC106865528 [Brachypodium distachyon]	-	-	-	-	-	-	-	-	-	-	-	-	-	-	-	-	-	-	-	-	PF13966.6	zf-RVT	-	-	-	-	-	-
TRINITY_DN6260_c0_g1	10.5651	1.34339	2.9754	0.024371	1	gi|1063881416|ref|XP_017997333.1|	1063881416	139	6.77e-40	Fatty acid-binding protein [Phialophora attae]	-	-	-	-	-	gi|74945278|sp|Q9NKW1.1|MFEA_DICDI	74945278	51.6	1.08e-06	RecName: Full=Peroxisomal multifunctional enzyme A; Short=MFE-A; AltName: Full=MFE-1; Includes: RecName: Full=3-hydroxyacyl-CoA dehydrogenase	-	-	-	-	-	-	-	KOG4170	I	2-enoyl-CoA hydratase/3-hydroxyacyl-CoA dehydrogenase/Peroxisomal 3-ketoacyl-CoA-thiolase, sterol-binding domain and related enzymes	PF02036.17	SCP2	-	-	-	-	-	-
TRINITY_DN4312_c0_g1	10.268	1.34339	2.9342	0.049353	1	gi|1027161843|gb|OAG22216.1|	1027161843	358	1.53e-119	hypothetical protein CC77DRAFT_1019220 [Alternaria alternata]	gi|1343453193|gb|CP022033.1|	1343453193	1090	0	Alternaria solani isolate NL03003 chromosome 10, complete sequence	-	-	-	-	-	-	-	-	-	-	-	-	-	-	-	-	-	-	-	-	-	-	-
TRINITY_DN34606_c0_g1	9.58443	1.26242	2.9245	0.03941	1	gi|326515362|dbj|BAK03594.1|	326515362	508	3.73e-178	predicted protein [Hordeum vulgare subsp. vulgare]	gi|629648999|ref|XM_007803754.1|	629648999	87.9	6.56e-13	Endocarpon pusillum Z07020 hypothetical protein mRNA	gi|117183|sp|P24458.1|CP52E_CANMA	117183	224	2.26e-68	RecName: Full=Cytochrome P450 52A3-B; Short=CYP52A3-B; AltName: Full=Alkane-inducible P450-ALK1-B; AltName: Full=CYPLIIA3 [Candida maltosa]	-	-	-	-	-	-	-	KOG0157	QI	Cytochrome P450 CYP4/CYP19/CYP26 subfamilies	PF00067.22	p450	GO:0055114//GO:0006998//GO:0006611//GO:0006406	oxidation-reduction process//nuclear envelope organization//protein export from nucleus//mRNA export from nucleus	GO:0016712//GO:0020037//GO:0005506	oxidoreductase activity, acting on paired donors, with incorporation or reduction of molecular oxygen, reduced flavin or flavoprotein as one donor, and incorporation of one atom of oxygen//heme binding//iron ion binding	GO:0016021//GO:0031965	integral component of membrane//nuclear membrane
TRINITY_DN16603_c0_g1	9.7108	1.30291	2.8979	0.034752	1	gi|296411422|ref|XP_002835431.1|	296411422	270	2.72e-89	40S ribosomal protein S16 [Tuber melanosporum Mel28]	gi|748515753|ref|XM_011126260.1|	748515753	350	8.31e-92	Arthrobotrys oligospora ATCC 24927 hypothetical protein mRNA	gi|59800208|sp|Q7SFJ9.1|RS16_NEUCR	59800208	216	1.37e-69	RecName: Full=40S ribosomal protein S16	Genetic Information Processing	Translation	Ribosome	ko03010	K02960	small subunit ribosomal protein S16e	--	KOG1753	J	40S ribosomal protein S16	PF00380.19	Ribosomal_S9	GO:0006412	translation	GO:0003735	structural constituent of ribosome	GO:0005840	ribosome
TRINITY_DN45195_c1_g1	14.0004	1.89363	2.8862	0.011349	1	gi|296417456|ref|XP_002838373.1|	296417456	154	2.67e-44	60S ribosomal protein L6 [Tuber melanosporum Mel28]	gi|47073980|ref|NM_210362.1|	47073980	75	4.14e-09	Eremothecium gossypii ATCC 10895 60S ribosomal protein L6 (AGOS_AER149W), partial mRNA	gi|74851017|sp|Q54D63.1|RL6_DICDI	74851017	105	3.74e-26	RecName: Full=60S ribosomal protein L6	Genetic Information Processing	Translation	Ribosome	ko03010	K02934	large subunit ribosomal protein L6e	--	KOG1694	J	60s ribosomal protein L6	PF10541.9//PF01159.19	KASH//Ribosomal_L6e	GO:0006412//GO:0009267//GO:0036170//GO:0036180	translation//cellular response to starvation//filamentous growth of a population of unicellular organisms in response to starvation//filamentous growth of a population of unicellular organisms in response to biotic stimulus	GO:0003735	structural constituent of ribosome	GO:0005829//GO:0005840//GO:0005730//GO:0009986//GO:0016020	cytosol//ribosome//nucleolus//cell surface//membrane
TRINITY_DN37645_c0_g1	17.5391	2.40338	2.8674	0.0054024	1	gi|821503783|gb|KKZ60983.1|	821503783	200	5.46e-63	60S ribosomal protein [Emmonsia crescens UAMH 3008]	gi|1240654053|ref|XM_022430326.1|	1240654053	185	1.85e-42	Pochonia chlamydosporia 170 ribosomal protein L26 (VFPPC_18761), partial mRNA	gi|6225986|sp|P78946.1|RL26_SCHPO	6225986	147	1.31e-43	RecName: Full=60S ribosomal protein L26	Genetic Information Processing	Translation	Ribosome	ko03010	K02898	large subunit ribosomal protein L26e	--	KOG3401	J	60S ribosomal protein L26	PF16906.5//PF00467.29	Ribosomal_L26//KOW	GO:0006412	translation	GO:0003735	structural constituent of ribosome	GO:0015934	large ribosomal subunit
TRINITY_DN37014_c0_g1	12.1766	1.67924	2.8582	0.017502	1	gi|296411889|ref|XP_002835661.1|	296411889	363	8.39e-120	hypothetical protein [Tuber melanosporum Mel28]	gi|1383849061|ref|XM_024856637.1|	1383849061	134	9.28e-27	[Candida] pseudohaemulonii hypothetical protein (C7M61_001220), partial mRNA	gi|30913515|sp|Q9P5N4.2|YH81_SCHPO	30913515	203	3.26e-59	RecName: Full=Uncharacterized amino-acid permease C359.01	--	--	--	--	K16261	yeast amino acid transporter	--	KOG1286	E	Amino acid transporters	PF00324.21	AA_permease	GO:0003333	amino acid transmembrane transport	GO:0015171	amino acid transmembrane transporter activity	GO:0016021	integral component of membrane
TRINITY_DN52677_c2_g1	11.5285	1.59827	2.8506	0.023911	1	gi|770219166|gb|AJW67890.1|	770219166	60.8	1.39e-08	methionine sulfoxide reductase [Zea mays]	gi|242380677|emb|FP096510.1|	242380677	89.8	2.65e-13	Phyllostachys edulis cDNA clone: bphylf002j22, full insert sequence	gi|122246997|sp|Q10L32.1|MSRB5_ORYSJ	122246997	50.8	1.48e-06	RecName: Full=Peptide methionine sulfoxide reductase B5; Short=OsMSRB5; AltName: Full=Peptide-methionine (R)-S-oxide reductase	-	-	-	-	-	-	-	-	-	-	-	-	-	-	-	-	-	-
TRINITY_DN158815_c0_g1	30.7364	4.26542	2.8492	0.037003	1	gi|1027163618|gb|OAG23988.1|	1027163618	777	0	hypothetical protein CC77DRAFT_928959 [Alternaria alternata]	gi|1343453184|gb|CP022024.1|	1343453184	339	2.49e-88	Alternaria solani isolate NL03003 chromosome 1, complete sequence	-	-	-	-	-	-	-	-	-	-	-	-	-	-	-	PF12657.7	TFIIIC_delta	--	--	--	--	GO:0016021	integral component of membrane
TRINITY_DN53656_c2_g4	9.19969	1.28711	2.8374	0.046204	1	gi|38567889|emb|CAE03644.2|	38567889	409	2.53e-131	OSJNBa0060N03.9 [Oryza sativa Japonica Group]	-	-	-	-	-	gi|134039176|sp|Q03494.2|YD22B_YEAST	134039176	97.4	2.39e-20	RecName: Full=Transposon Ty2-DR2 Gag-Pol polyprotein; AltName: Full=TY2A-TY2B; AltName: Full=Transposon Ty2 TYA-TYB polyprotein; Contains: RecName: Full=Capsid protein; Short=CA; Contains: RecName: Full=Ty2 protease; Short=PR; Contains: RecName: Full=Integrase; Short=IN; Contains: RecName: Full=Reverse transcriptase/ribonuclease H; Short=RT; Short=RT-RH	-	-	-	-	-	-	-	KOG0017	R	FOG: Transposon-encoded proteins with TYA, reverse transcriptase, integrase domains in various combinations	PF00665.26	rve	GO:0044237	cellular metabolic process	GO:0016772//GO:0046872//GO:0097159//GO:1901363	transferase activity, transferring phosphorus-containing groups//metal ion binding//organic cyclic compound binding//heterocyclic compound binding	GO:0009536	plastid
TRINITY_DN41625_c1_g2	13.4529	1.89363	2.8287	0.014911	1	gi|636759987|ref|XP_008082167.1|	636759987	465	1.39e-162	NAD(P)-linked oxidoreductase [Glarea lozoyensis ATCC 20868]	gi|256542358|gb|AC237388.1|	256542358	156	2.29e-33	Neurospora tetrasperma clone JGIFHCO-17A10, complete sequence	gi|152031729|sp|O94735.2|XYL1_PICGU	152031729	379	3.01e-130	RecName: Full=NADPH-dependent D-xylose reductase; Short=XR	-	-	-	-	-	-	-	KOG1577	R	Aldo/keto reductase family proteins	PF00248.21	Aldo_ket_red	GO:0055114	oxidation-reduction process	GO:0016491	oxidoreductase activity	--	--
TRINITY_DN75543_c0_g1	19.1555	2.71148	2.8206	0.0025708	1	gi|821083386|gb|KKY36811.1|	821083386	130	1.73e-36	putative 60s ribosomal protein l36 [Diaporthe ampelina]	gi|1216650023|gb|CP017348.1|	1216650023	65.8	2.11e-06	Talaromyces pinophilus strain 1-95 chromosome 5, complete sequence	gi|17865567|sp|Q9M352.1|RL362_ARATH	17865567	67.4	1.61e-13	RecName: Full=60S ribosomal protein L36-2	-	-	-	-	-	-	-	-	-	-	PF01158.18	Ribosomal_L36e	GO:0006412	translation	GO:0003735	structural constituent of ribosome	GO:0005840	ribosome
TRINITY_DN121868_c0_g1	11.548	1.63875	2.817	0.023674	1	gi|1027163497|gb|OAG23867.1|	1027163497	94.7	1.86e-19	cel1 protein precursor [Alternaria alternata]	gi|1070544943|ref|XM_018532534.1|	1070544943	385	2.46e-102	Alternaria alternata NAD(P)-binding protein mRNA	gi|74623591|sp|Q96WQ9.1|EGLD_ASPKW	74623591	97.4	3.37e-21	RecName: Full=Probable endo-beta-1,4-glucanase D; Short=Endoglucanase D; AltName: Full=Carboxymethylcellulase D; AltName: Full=Cellulase 61A; AltName: Full=Cellulase D; Flags: Precursor [Aspergillus kawachii IFO 4308]	-	-	-	-	-	-	-	-	-	-	PF03443.14//PF00734.18	Glyco_hydro_61//CBM_1	GO:0055114	oxidation-reduction process	GO:0016787//GO:0004497	hydrolase activity//monooxygenase activity	--	--
TRINITY_DN20474_c0_g1	13.0366	1.85314	2.8145	0.017581	1	gi|296413907|ref|XP_002836648.1|	296413907	287	3.88e-91	hypothetical protein [Tuber melanosporum Mel28]	gi|1092956209|ref|XM_018894067.1|	1092956209	195	4.21e-45	Fusarium verticillioides 7600 omega-6 fatty acid desaturase (delta-12 desaturase) (FVEG_05830), mRNA	gi|75337483|sp|Q9SP62.1|FADX_IMPBA	75337483	109	1.03e-25	RecName: Full=Delta(12) acyl-lipid conjugase (11E,13E-forming); Short=ImpFadX	Metabolism	Global and overview maps	Fatty acid metabolism	ko01212	K10256	omega-6 fatty acid desaturase / acyl-lipid omega-6 desaturase (Delta-12 desaturase)	1.14.19.6	-	-	-	PF00487.24	FA_desaturase	GO:0055114//GO:0006629	oxidation-reduction process//lipid metabolic process	GO:0016717	oxidoreductase activity, acting on paired donors, with oxidation of a pair of donors resulting in the reduction of molecular oxygen to two molecules of water	GO:0016021	integral component of membrane
TRINITY_DN42143_c0_g1	33.1622	4.80676	2.7864	0.031882	1	gi|628206074|ref|XP_007712056.1|	628206074	205	2.14e-66	hypothetical protein COCCADRAFT_36559 [Bipolaris zeicola 26-R-13]	gi|1343453184|gb|CP022024.1|	1343453184	224	2.66e-54	Alternaria solani isolate NL03003 chromosome 1, complete sequence	-	-	-	-	-	-	-	-	-	-	-	-	-	-	-	-	-	-	-	-	-	-	-
TRINITY_DN13813_c0_g1	18.5185	2.68678	2.785	0.010059	1	gi|1027156613|gb|OAG16999.1|	1027156613	962	0	3-oxoacid CoA-transferase [Alternaria alternata]	gi|1235732201|gb|CP022854.1|	1235732201	970	0	Parastagonospora nodorum isolate Sn79-1087 chromosome 4, complete sequence	gi|81868394|sp|Q9ESL0.1|SCO2B_MOUSE	81868394	473	1e-161	RecName: Full=Succinyl-CoA:3-ketoacid coenzyme A transferase 2B, mitochondrial; AltName: Full=3-oxoacid CoA-transferase 2B; AltName: Full=Testis-specific succinyl-CoA:3-oxoacid CoA-transferase 2; Short=SCOT-t2; Flags: Precursor	-	-	-	-	-	-	-	KOG3822	C	Succinyl-CoA:alpha-ketoacid-CoA transferase	PF01144.23	CoA_trans	GO:0046952	ketone body catabolic process	GO:0008260	3-oxoacid CoA-transferase activity	GO:0005739	mitochondrion
TRINITY_DN47245_c0_g1	21.7758	3.16495	2.7825	0.0021232	1	gi|164455204|dbj|BAF97105.1|	164455204	256	3.85e-82	putative ankyrin repeat protein [Triticum aestivum]	gi|932283455|gb|CP012620.1|	932283455	108	4.53e-19	Oryza sativa Indica Group cultivar RP Bio-226 chromosome 12 sequence	gi|75077117|sp|Q4R8N7.1|STIP1_MACFA	75077117	53.9	5.56e-07	RecName: Full=Stress-induced-phosphoprotein 1; Short=STI1; AltName: Full=Hsc70/Hsp90-organizing protein; Short=Hop	-	-	-	-	-	-	-	KOG0548	O	Molecular co-chaperone STI1	PF07719.17	TPR_2	-	-	-	-	-	-
TRINITY_DN55960_c0_g1	9.12791	1.3276	2.7815	0.046453	1	gi|944058832|gb|KQJ94422.1|	944058832	167	2.55e-47	hypothetical protein BRADI_3g10422v3 [Brachypodium distachyon]	gi|1371071953|ref|XM_014900071.2|	1371071953	333	2.28e-87	PREDICTED: Brachypodium distachyon protein FAR1-RELATED SEQUENCE 3 (LOC100824195), mRNA	-	-	-	-	-	-	-	-	-	-	-	-	-	-	-	-	-	GO:0006355	regulation of transcription, DNA-templated	GO:0008270	zinc ion binding	--	--
TRINITY_DN53093_c0_g2	13.9442	2.03288	2.7781	0.037794	1	gi|474342644|gb|EMS62713.1|	474342644	28.1	2.92e-08	Zinc finger CCHC domain-containing protein 8 [Triticum urartu]	gi|300681466|emb|FN564430.1|	300681466	128	5.13e-25	Triticum aestivum chromosome 3B-specific BAC library, contig ctg0464b	-	-	-	-	-	-	-	-	-	-	-	-	-	-	-	-	-	--	--	GO:0008270//GO:0003676	zinc ion binding//nucleic acid binding	--	--
TRINITY_DN88800_c0_g1	11.4039	1.66345	2.7773	0.024149	1	gi|1018273324|gb|KZF25418.1|	1018273324	172	2.95e-50	putative phosphatidylglycerol/phosphatidylinositol transfer protein [Xylona heveae TC161]	-	-	-	-	-	gi|73621322|sp|Q6BV42.1|NPC2_DEBHA	73621322	130	3.6e-35	RecName: Full=Phosphatidylglycerol/phosphatidylinositol transfer protein; Short=PG/PI-TP; Flags: Precursor	-	-	-	-	-	-	-	KOG4680	R	Uncharacterized conserved protein, contains ML domain	PF02221.15	E1_DerP2_DerF2	GO:0032366	intracellular sterol transport	--	--	GO:0000328	fungal-type vacuole lumen
TRINITY_DN45181_c0_g1	20.1525	2.95056	2.7719	0.0025611	1	gi|752279194|dbj|GAM86009.1|	752279194	90.9	3.23e-19	hypothetical protein ANO11243_040190 [fungal sp. No.11243]	-	-	-	-	-	-	-	-	-	-	-	-	-	-	-	-	-	-	-	-	-	-	-	-	-	-	-	-
TRINITY_DN29148_c0_g1	15.423	2.26996	2.7643	0.0092493	1	gi|1027165898|gb|OAG26265.1|	1027165898	1137	0	CTP synthase-like protein [Alternaria alternata]	gi|189207163|ref|XM_001939881.1|	189207163	1524	0	Pyrenophora tritici-repentis Pt-1C-BFP CTP synthase, mRNA	gi|110825737|sp|P70698.2|PYRG1_MOUSE	110825737	627	0	RecName: Full=CTP synthase 1; AltName: Full=CTP synthetase 1; AltName: Full=UTP--ammonia ligase 1	Metabolism	Nucleotide metabolism	Pyrimidine metabolism	ko00240	K01937	CTP synthase	6.3.4.2	-	-	-	PF06418.14//PF00117.28	CTP_synth_N//GATase	GO:0006541//GO:0044210	glutamine metabolic process//'de novo' CTP biosynthetic process	GO:0003883//GO:0005524	CTP synthase activity//ATP binding	--	--
TRINITY_DN26415_c0_g1	10.4803	1.55778	2.7501	0.03786	1	gi|116181354|ref|XP_001220526.1|	116181354	223	3.39e-70	hypothetical protein CHGG_01305 [Chaetomium globosum CBS 148.51]	gi|1248266115|ref|XM_022619168.1|	1248266115	75	4.65e-09	Colletotrichum orchidophilum extracellular proline-serine rich protein (CORC01_07532), partial mRNA	-	-	-	-	-	-	-	-	-	-	-	-	-	-	-	PF10342.9	GPI-anchored	-	-	-	-	-	-
TRINITY_DN42906_c0_g1	10.4613	1.55778	2.7475	0.037975	1	gi|326495612|dbj|BAJ85902.1|	326495612	301	1.5e-100	predicted protein [Hordeum vulgare subsp. vulgare]	gi|42821606|dbj|AK104991.2|	42821606	67.6	8.08e-07	Oryza sativa Japonica Group cDNA clone:001-002-E02, full insert sequence	-	-	-	-	-	-	-	-	-	-	-	-	-	-	-	PF14009.6	DUF4228	-	-	-	-	-	-
TRINITY_DN61503_c0_g5	12.8955	1.94301	2.7305	0.019433	1	gi|474219611|gb|EMS59208.1|	474219611	329	2.06e-103	Putative serine/threonine-protein kinase-like protein CCR3 [Triticum urartu]	gi|50726137|dbj|AP005633.3|	50726137	76.8	2.98e-09	Oryza sativa Japonica Group genomic DNA, chromosome 9, PAC clone:P0463G11	gi|75262670|sp|Q9FLJ8.1|Y5613_ARATH	75262670	157	3.68e-39	RecName: Full=Probable receptor-like protein kinase At5g61350; Flags: Precursor	-	-	-	-	-	-	-	KOG1187	T	Serine/threonine protein kinase	PF00069.25	Pkinase	--	--	GO:0016301	kinase activity	--	--
TRINITY_DN32843_c0_g1	13.7908	2.08916	2.7227	0.012476	1	gi|1027164000|gb|OAG24369.1|	1027164000	522	3.38e-180	hypothetical protein CC77DRAFT_1037795 [Alternaria alternata]	gi|891592418|ref|XM_013168575.1|	891592418	67.6	1.32e-06	Schizosaccharomyces cryophilus OY26 vacuolar carboxypeptidase Y mRNA	gi|332313304|sp|B8NXS9.1|CBPYA_ASPFN	332313304	483	1.69e-166	RecName: Full=Carboxypeptidase Y homolog A; Flags: Precursor	Organismal Systems	Endocrine system	Renin-angiotensin system	ko04614	K13289	cathepsin A (carboxypeptidase C)	3.4.16.5	KOG1282	OE	Serine carboxypeptidases (lysosomal cathepsin A)	PF00450.22	Peptidase_S10	GO:0006508	proteolysis	GO:0004185	serine-type carboxypeptidase activity	GO:0005773	vacuole
TRINITY_DN61453_c2_g1	13.9373	2.13271	2.7082	0.031041	1	gi|473786885|gb|EMS46234.1|	473786885	168	3.65e-44	Regulatory protein NPR1 [Triticum urartu]	gi|1149803413|ref|XM_020306225.1|	1149803413	121	6.29e-23	PREDICTED: Aegilops tauschii subsp. tauschii putative disease resistance RPP13-like protein 2 (LOC109747137), transcript variant X1, mRNA	-	-	-	-	-	-	-	-	-	-	-	-	-	-	-	-	-	GO:0006915//GO:0006351	apoptotic process//transcription, DNA-templated	GO:0005524	ATP binding	--	--
TRINITY_DN33090_c0_g1	10.4412	1.59827	2.7077	0.037852	1	gi|296411571|ref|XP_002835504.1|	296411571	201	1.03e-58	hypothetical protein [Tuber melanosporum Mel28]	gi|1489397803|ref|XM_026759219.1|	1489397803	254	4.88e-63	Aspergillus thermomutatus Hsp70 chaperone (HSP70), partial mRNA	gi|26395100|sp|O59855.3|HSP72_SCHPO	26395100	166	2.76e-46	RecName: Full=Probable heat shock protein ssa2	Human Diseases	Infectious diseases: Viral	Epstein-Barr virus infection	ko05169	K03283	heat shock 70kDa protein 1/8	--	-	-	-	PF00012.20//PF05236.14//PF10712.9	HSP70//TAF4//NAD-GH	GO:0006457//GO:0006616	protein folding//SRP-dependent cotranslational protein targeting to membrane, translocation	GO:0005524//GO:0051082	ATP binding//unfolded protein binding	GO:0005737//GO:0005634	cytoplasm//nucleus
TRINITY_DN12201_c0_g1	14.6666	2.31045	2.6663	0.012366	1	gi|71000643|ref|XP_755003.1|	71000643	297	4.19e-101	ubiquitin conjugating enzyme (UbcD), putative [Aspergillus fumigatus Af293]	gi|1089734583|ref|XM_018847498.1|	1089734583	239	1.43e-58	Isaria fumosorosea ARSEF 2679 Ubiquitin-conjugating enzyme/RWD-like protein (ISF_03892), partial mRNA	gi|51338680|sp|P62839.1|UB2D2_RAT	51338680	266	3.63e-90	RecName: Full=Ubiquitin-conjugating enzyme E2 D2; AltName: Full=(E3-independent) E2 ubiquitin-conjugating enzyme D2; AltName: Full=E2 ubiquitin-conjugating enzyme D2; AltName: Full=Ubiquitin carrier protein D2; AltName: Full=Ubiquitin-conjugating enzyme E2(17)KB 2; AltName: Full=Ubiquitin-conjugating enzyme E2-17 kDa 2; AltName: Full=Ubiquitin-protein ligase D2	Genetic Information Processing	Folding, sorting and degradation	Protein processing in endoplasmic reticulum	ko04141	K06689	ubiquitin-conjugating enzyme E2 D/E	2.3.2.23	-	-	-	PF00179.26	UQ_con	GO:0034067//GO:0016485//GO:0060049//GO:0031146//GO:0045842	protein localization to Golgi apparatus//protein processing//regulation of protein glycosylation//SCF-dependent proteasomal ubiquitin-dependent protein catabolic process//positive regulation of mitotic metaphase/anaphase transition	GO:0061631//GO:0016881//GO:0005524	ubiquitin conjugating enzyme activity//acid-amino acid ligase activity//ATP binding	GO:0042787//GO:0005829//GO:0043224	//cytosol//nuclear SCF ubiquitin ligase complex
TRINITY_DN46468_c0_g1	16.2792	2.56533	2.6658	0.0090603	1	gi|303319371|ref|XP_003069685.1|	303319371	217	4.4e-69	60S ribosomal protein L25 [Coccidioides posadasii C735 delta SOWgp]	gi|930138851|ref|XM_014314357.1|	930138851	250	7.05e-62	Grosmannia clavigera kw1407 60S ribosomal protein l23 partial mRNA	gi|3122703|sp|O22644.1|RL23A_FRIAG	3122703	141	6.06e-41	RecName: Full=60S ribosomal protein L23A	-	-	-	-	-	-	-	-	-	-	PF03939.13//PF00276.20	Ribosomal_L23eN//Ribosomal_L23	GO:0006412	translation	GO:0003735//GO:0000166	structural constituent of ribosome//nucleotide binding	GO:0005840	ribosome
TRINITY_DN128267_c0_g1	14.526	2.29466	2.6623	0.01386	1	gi|1027162882|gb|OAG23253.1|	1027162882	730	0	concanavalin A-like lectin/glucanase [Alternaria alternata]	gi|636587474|ref|XM_008026885.1|	636587474	444	6.26e-120	Setosphaeria turcica Et28A glycoside hydrolase family 16 protein partial mRNA	gi|462032|sp|P33693.1|EXOK_RHIME	462032	56.2	1.62e-07	RecName: Full=Endo-1,3-1,4-beta-glycanase ExoK; AltName: Full=Succinoglycan biosynthesis protein ExoK; Flags: Precursor	-	-	-	-	-	-	-	-	-	-	PF00722.21	Glyco_hydro_16	GO:0005975	carbohydrate metabolic process	GO:0004553	hydrolase activity, hydrolyzing O-glycosyl compounds	GO:0016021	integral component of membrane
TRINITY_DN55001_c1_g4	19.2267	3.07202	2.6459	0.0037513	1	gi|326489675|dbj|BAK01818.1|	326489675	228	1.25e-74	predicted protein [Hordeum vulgare subsp. vulgare]	gi|554783212|dbj|AK437004.1|	554783212	481	1.26e-131	Brachypodium distachyon mRNA, clone: PL016C01-A-083_B17	gi|88909691|sp|Q7XNS7.3|MTND3_ORYSJ	88909691	165	3.59e-51	RecName: Full=1,2-dihydroxy-3-keto-5-methylthiopentene dioxygenase 3; AltName: Full=Acireductone dioxygenase (Fe(2+)-requiring) 3; Short=ARD 3; Short=Fe-ARD 3	Metabolism	Amino acid metabolism	Cysteine and methionine metabolism	ko00270	K08967	1,2-dihydroxy-3-keto-5-methylthiopentene dioxygenase	1.13.11.53	KOG2107	S	Uncharacterized conserved protein, contains double-stranded beta-helix domain	PF03079.14	ARD	GO:0019509//GO:0055114	L-methionine salvage from methylthioadenosine//oxidation-reduction process	GO:0005506//GO:0010309	iron ion binding//acireductone dioxygenase [iron(II)-requiring] activity	GO:0005737//GO:0005634	cytoplasm//nucleus
TRINITY_DN170481_c0_g1	21.4307	3.43256	2.6423	0.0059987	1	gi|1027161159|gb|OAG21533.1|	1027161159	539	0	hypothetical protein CC77DRAFT_933573 [Alternaria alternata]	gi|1607819463|ref|XM_028651191.1|	1607819463	1533	0	Alternaria arborescens hypothetical protein (AA0111_g5114), partial mRNA	-	-	-	-	-	-	-	-	-	-	-	-	-	-	-	-	-	GO:0007166//GO:0007186	cell surface receptor signaling pathway//G protein-coupled receptor signaling pathway	GO:0004930	G protein-coupled receptor activity	GO:0016021	integral component of membrane
TRINITY_DN89033_c0_g1	12.5244	2.01509	2.6358	0.022325	1	gi|296413543|ref|XP_002836470.1|	296413543	469	4.99e-159	hypothetical protein [Tuber melanosporum Mel28]	-	-	-	-	-	gi|296452890|sp|Q8IY34.2|S15A3_HUMAN	296452890	82.8	1.36e-15	RecName: Full=Solute carrier family 15 member 3; AltName: Full=Osteoclast transporter; AltName: Full=Peptide transporter 3; AltName: Full=Peptide/histidine transporter 2	--	--	--	--	K03305	proton-dependent oligopeptide transporter, POT family	--	KOG1237	E	H+/oligopeptide symporter	PF00854.21	PTR2	GO:0042938	dipeptide transport	--	--	GO:0042936//GO:0005886//GO:0044425	//plasma membrane//membrane part
TRINITY_DN36650_c0_g1	21.6617	3.50079	2.6294	0.0044231	1	gi|549049997|emb|CCX10909.1|	549049997	153	9.02e-41	Similar to GPI anchored serine-threonine rich protein [Aspergillus fumigatus Af293]; acc. no. XP_750113 [Pyronema omphalodes CBS 100304]	-	-	-	-	-	-	-	-	-	-	-	-	-	-	-	-	-	-	-	-	PF10342.9	GPI-anchored	--	--	GO:0004622	lysophospholipase activity	--	--
TRINITY_DN51834_c1_g2	12.4586	2.02399	2.6219	0.022519	1	gi|701780725|gb|KGQ14004.1|	701780725	669	0	Elongation factor G 1 [Beauveria bassiana D1-5]	gi|1575585379|gb|CP035913.1|	1575585379	621	2.13e-173	Massilia lutea strain DSM 17473 chromosome	gi|119368692|sp|Q13TG7.1|EFG2_BURXL	119368692	740	0	RecName: Full=Elongation factor G 2; Short=EF-G 2	-	-	-	-	-	-	-	KOG0465	J	Mitochondrial elongation factor	PF00009.27//PF03144.25//PF14492.6	GTP_EFTU//GTP_EFTU_D2//EFG_II	GO:0070125	mitochondrial translational elongation	GO:0003746//GO:0003924//GO:0005525	translation elongation factor activity//GTPase activity//GTP binding	GO:0005739//GO:0009536	mitochondrion//plastid
TRINITY_DN28347_c0_g1	24.8486	4.09152	2.6025	0.0017412	1	gi|296421407|ref|XP_002840256.1|	296421407	197	1.26e-62	60S ribosomal protein L33 [Tuber melanosporum Mel28]	gi|1352666049|emb|LN649229.1|	1352666049	71.3	5.11e-08	Fusarium venenatum strain A3/5 genome assembly, chromosome: I	gi|1350742|sp|P49180.3|RL35A_CAEEL	1350742	117	1.62e-32	RecName: Full=60S ribosomal protein L35a	-	-	-	-	-	-	-	KOG0887	J	60S ribosomal protein L35A/L37	PF01247.18	Ribosomal_L35Ae	GO:0006412	translation	GO:0003735	structural constituent of ribosome	GO:0005840	ribosome
TRINITY_DN66480_c0_g1	31.2456	5.14845	2.6014	0.00041502	0.85395	gi|296413574|ref|XP_002836485.1|	296413574	222	3.15e-69	60S ribosomal protein L13 [Tuber melanosporum Mel28]	gi|296413573|ref|XM_002836439.1|	296413573	139	1.96e-28	Tuber melanosporum Mel28 60S ribosomal protein L13, partial mRNA	gi|730531|sp|P40212.1|RL13B_YEAST	730531	159	1.59e-46	RecName: Full=60S ribosomal protein L13-B	Genetic Information Processing	Translation	Ribosome	ko03010	K02873	large subunit ribosomal protein L13e	--	KOG3295	J	60S Ribosomal protein L13	PF01294.18	Ribosomal_L13e	GO:0006412	translation	GO:0003735	structural constituent of ribosome	GO:0005840//GO:0005829	ribosome//cytosol
TRINITY_DN211355_c0_g1	11.8468	1.9746	2.5849	0.029929	1	gi|1027159436|gb|OAG19814.1|	1027159436	835	0	cell wall assembly and cell proliferation coordinating protein [Alternaria alternata]	gi|915677477|ref|XM_013483706.1|	915677477	220	1.15e-52	Aureobasidium subglaciale EXF-2481 hypothetical protein partial mRNA	gi|218511792|sp|Q6BW41.2|SMI1_DEBHA	218511792	133	1.29e-32	RecName: Full=KNR4/SMI1 homolog 1	-	-	-	-	-	-	-	-	-	-	PF09346.10	SMI1_KNR4	GO:0042546//GO:0070317	cell wall biogenesis//negative regulation of G0 to G1 transition	--	--	GO:0032153	cell division site
TRINITY_DN7604_c0_g1	11.8398	1.9746	2.584	0.030166	1	gi|1020430789|gb|KZL66940.1|	1020430789	83.6	5.48e-17	hypothetical protein CT0861_04233 [Colletotrichum tofieldiae]	-	-	-	-	-	-	-	-	-	-	-	-	-	-	-	-	-	-	-	-	-	-	-	-	-	-	-	-
TRINITY_DN39034_c0_g1	19.0438	3.18074	2.5819	0.0061634	1	gi|549045025|emb|CCX15247.1|	549045025	340	7.02e-111	Similar to Tyrosinase; acc. no. P55023 [Pyronema omphalodes CBS 100304]	-	-	-	-	-	gi|418143|sp|Q04604.1|TYRO_PELNI	418143	58.9	6.88e-08	RecName: Full=Tyrosinase; AltName: Full=Monophenol monooxygenase; Flags: Precursor [Pelophylax nigromaculatus]	Organismal Systems	Endocrine system	Melanogenesis	ko04916	K00505	tyrosinase	1.14.18.1	-	-	-	PF00264.20	Tyrosinase	-	-	-	-	-	-
TRINITY_DN34371_c0_g2	22.3641	3.74677	2.5775	0.038131	1	gi|326487736|dbj|BAK05540.1|	326487736	1186	0	predicted protein [Hordeum vulgare subsp. vulgare]	gi|169603991|ref|XM_001795365.1|	169603991	93.5	2.93e-14	Parastagonospora nodorum SN15 hypothetical protein (SNOG_05005), partial mRNA	gi|1351983|sp|P49092.2|ASNS1_LOTJA	1351983	542	0	RecName: Full=Asparagine synthetase [glutamine-hydrolyzing] 1; AltName: Full=Glutamine-dependent asparagine synthetase 1	-	-	-	-	-	-	-	KOG0571	E	Asparagine synthase (glutamine-hydrolyzing)	PF13537.6//PF00733.21	GATase_7//Asn_synthase	GO:0006529	asparagine biosynthetic process	GO:0004066	asparagine synthase (glutamine-hydrolyzing) activity	--	--
TRINITY_DN53374_c2_g9	15.8454	2.68678	2.5601	0.011048	1	gi|473964154|gb|EMS51173.1|	473964154	154	2.08e-40	hypothetical protein TRIUR3_15210 [Triticum urartu]	gi|932283359|gb|CP012619.1|	932283359	139	1.23e-28	Oryza sativa Indica Group cultivar RP Bio-226 chromosome 11 sequence	-	-	-	-	-	-	-	-	-	-	-	-	-	-	-	PF13968.6	DUF4220	--	--	--	--	GO:0016021//GO:0016023	integral component of membrane//
TRINITY_DN100685_c0_g1	14.1539	2.40032	2.5599	0.015788	1	gi|1027154946|gb|OAG15338.1|	1027154946	621	0	hypothetical protein CC77DRAFT_1066229 [Alternaria alternata]	gi|1343453188|gb|CP022028.1|	1343453188	817	0	Alternaria solani isolate NL03003 chromosome 5, complete sequence	-	-	-	-	-	-	-	-	-	-	-	-	-	-	-	-	-	--	--	--	--	GO:0016021	integral component of membrane
TRINITY_DN16519_c0_g1	19.8183	3.37044	2.5558	0.006082	1	gi|526204728|gb|EPS44907.1|	526204728	272	1.92e-87	hypothetical protein H072_1095 [Dactylellina haptotyla CBS 200.50]	-	-	-	-	-	gi|90111865|sp|Q29380.2|VDAC3_PIG	90111865	132	1.2e-34	RecName: Full=Voltage-dependent anion-selective channel protein 3; Short=VDAC-3; AltName: Full=Outer mitochondrial membrane protein porin 3	Human Diseases	Infectious diseases: Viral	HTLV-I infection	ko05166	K15040	voltage-dependent anion channel protein 2	--	-	-	-	PF01459.22	Porin_3	GO:0006820	anion transport	--	--	--	--
TRINITY_DN122809_c0_g1	22.3779	3.82085	2.5501	0.0030474	1	gi|296423535|ref|XP_002841309.1|	296423535	182	1.97e-57	40S ribosomal protein S20 [Tuber melanosporum Mel28]	gi|1419189484|ref|XM_025644142.1|	1419189484	217	4.32e-52	Aspergillus aculeatinus CBS 121060 40S ribosomal protein S20 (BO66DRAFT_332626), partial mRNA	gi|109940157|sp|P35686.2|RS20_ORYSJ	109940157	121	6.82e-35	RecName: Full=40S ribosomal protein S20	Genetic Information Processing	Translation	Ribosome	ko03010	K02969	small subunit ribosomal protein S20e	--	-	-	-	PF00338.22	Ribosomal_S10	GO:0006412//GO:0000462	translation//maturation of SSU-rRNA from tricistronic rRNA transcript (SSU-rRNA, 5.8S rRNA, LSU-rRNA)	GO:0003723//GO:0003735	RNA binding//structural constituent of ribosome	GO:0022627	cytosolic small ribosomal subunit
TRINITY_DN28455_c0_g1	19.3105	3.31799	2.541	0.0053577	1	gi|1027155899|gb|OAG16287.1|	1027155899	706	0	glycoside hydrolase family 5 protein [Alternaria alternata]	gi|1066281864|ref|XM_018186973.1|	1066281864	113	1.69e-20	Paraphaeosphaeria sporulosa glycoside hydrolase mRNA	gi|121844|sp|P17974.2|GUN_RALSL	121844	153	1.5e-40	RecName: Full=Endoglucanase; AltName: Full=Cellulase; AltName: Full=Endo-1,4-beta-glucanase; Flags: Precursor [Ralstonia solanacearum]	-	-	-	-	-	-	-	-	-	-	PF00734.18//PF00150.18	CBM_1//Cellulase	GO:0008152	metabolic process	GO:0016798	hydrolase activity, acting on glycosyl bonds	--	--
TRINITY_DN189083_c0_g1	11.2324	1.93412	2.5379	0.039713	1	gi|1027162163|gb|OAG22535.1|	1027162163	469	1.25e-149	hypothetical protein CC77DRAFT_1059430 [Alternaria alternata]	gi|1070547251|ref|XM_018529444.1|	1070547251	87.9	8.51e-13	Alternaria alternata hypothetical protein partial mRNA	-	-	-	-	-	-	-	-	-	-	-	-	-	-	-	PF16621.5	NECFESHC	--	--	GO:0016462	pyrophosphatase activity	GO:0005737	cytoplasm
TRINITY_DN10722_c0_g1	17.9396	3.09977	2.5329	0.00931	1	gi|1046803201|gb|OCL09228.1|	1046803201	228	1.22e-69	lytic polysaccharide monooxygenase [Glonium stellatum]	-	-	-	-	-	gi|74623591|sp|Q96WQ9.1|EGLD_ASPKW	74623591	66.2	2.1e-10	RecName: Full=Probable endo-beta-1,4-glucanase D; Short=Endoglucanase D; AltName: Full=Carboxymethylcellulase D; AltName: Full=Cellulase 61A; AltName: Full=Cellulase D; Flags: Precursor [Aspergillus kawachii IFO 4308]	-	-	-	-	-	-	-	-	-	-	PF03443.14//PF00734.18	Glyco_hydro_61//CBM_1	-	-	-	-	-	-
TRINITY_DN51737_c2_g1	28.3562	4.92822	2.5245	0.0012271	1	gi|582956203|gb|EWC44437.1|	582956203	276	7.47e-91	60S ribosomal protein L17 [Drechslerella stenobrocha 248]	gi|631377685|ref|XM_007925032.1|	631377685	206	1.95e-48	Pseudocercospora fijiensis CIRAD86 hypothetical protein mRNA	gi|585868|sp|P37380.1|RL17_PODCA	585868	213	1.16e-67	RecName: Full=60S ribosomal protein L17	-	-	-	-	-	-	-	KOG3353	J	60S ribosomal protein L22	PF00237.19	Ribosomal_L22	GO:0006412	translation	GO:0003735	structural constituent of ribosome	GO:0015934	large ribosomal subunit
TRINITY_DN20488_c0_g1	17.5734	3.05928	2.5221	0.010682	1	gi|549054176|emb|CCX06980.1|	549054176	561	0	Similar to Septin homolog spn2; acc. no. Q09116 [Pyronema omphalodes CBS 100304]	gi|576033691|ref|XM_006690656.1|	576033691	257	5.58e-64	Chaetomium thermophilum var. thermophilum DSM 1495 putative GTP binding protein (CTHT_0001700), partial mRNA	gi|93141311|sp|Q9UHD8.2|SEPT9_HUMAN	93141311	312	1.07e-100	RecName: Full=Septin-9; AltName: Full=MLL septin-like fusion protein MSF-A; Short=MLL septin-like fusion protein; AltName: Full=Ovarian/Breast septin; Short=Ov/Br septin; AltName: Full=Septin D1	Human Diseases	Infectious diseases: Bacterial	Bacterial invasion of epithelial cells	ko05100	K16938	septin 3/9/12	--	-	-	-	PF00735.18	Septin	--	--	GO:0005525	GTP binding	--	--
TRINITY_DN28754_c0_g1	12.3373	2.14851	2.5216	0.033215	1	gi|526205189|gb|EPS45345.1|	526205189	61.2	2e-07	hypothetical protein H072_560 [Dactylellina haptotyla CBS 200.50]	-	-	-	-	-	gi|296439294|sp|Q9P2K5.3|MYEF2_HUMAN	296439294	56.2	3.13e-07	RecName: Full=Myelin expression factor 2; Short=MEF-2; Short=MyEF-2; AltName: Full=MST156	-	-	-	-	-	-	-	-	-	-	PF00076.22	RRM_1	--	--	GO:0003676//GO:0000166	nucleic acid binding//nucleotide binding	--	--
TRINITY_DN62494_c6_g1	15.8607	2.78861	2.5078	0.014868	1	gi|374430477|gb|AEZ51507.1|	374430477	195	1.15e-55	CBL-interacting protein kinase 23 [Hordeum vulgare subsp. spontaneum]	gi|1002861510|ref|XM_006657386.2|	1002861510	172	1.99e-38	PREDICTED: Oryza brachyantha uncharacterized LOC102708350 (LOC102708350), mRNA	gi|259016206|sp|Q2V452.2|CIPK3_ARATH	259016206	148	1.47e-39	RecName: Full=CBL-interacting serine/threonine-protein kinase 3; AltName: Full=SNF1-related kinase 3.17; AltName: Full=SOS2-like protein kinase PKS12	-	-	-	-	-	-	-	KOG0583	T	Serine/threonine protein kinase	PF00069.25	Pkinase	GO:0006468//GO:0035556	protein phosphorylation//intracellular signal transduction	GO:0005488//GO:0004674	binding//protein serine/threonine kinase activity	GO:0005739//GO:0005634	mitochondrion//nucleus
TRINITY_DN1757_c0_g1	15.3322	2.71148	2.4994	0.013254	1	gi|1027165709|gb|OAG26076.1|	1027165709	697	0	epoxide hydrolase-like protein [Alternaria alternata]	gi|1343453187|gb|CP022027.1|	1343453187	660	0	Alternaria solani isolate NL03003 chromosome 4, complete sequence	gi|306755666|sp|Q1JU72.1|DEHA_BURSP	306755666	67.4	1.91e-11	RecName: Full=Fluoroacetate dehalogenase	-	-	-	-	-	-	-	KOG4178	I	Soluble epoxide hydrolase	PF00561.20	Abhydrolase_1	--	--	GO:0003824	catalytic activity	--	--
TRINITY_DN125396_c0_g1	14.7873	2.6552	2.4775	0.017201	1	gi|473923527|gb|EMS49783.1|	473923527	120	1.4e-30	hypothetical protein TRIUR3_06504 [Triticum urartu]	gi|591390447|gb|JX295577.2|	591390447	67.6	8.01e-07	Aegilops tauschii chromosome 1Ds prolamin gene locus, complete sequence	-	-	-	-	-	-	-	-	-	-	-	-	-	-	-	-	-	-	-	-	-	-	-
TRINITY_DN48338_c1_g2	336.012	60.3511	2.4771	0.00045734	0.89262	gi|55296976|dbj|BAD68451.1|	55296976	117	1.02e-26	hypothetical protein [Oryza sativa Japonica Group]	-	-	-	-	-	-	-	-	-	-	-	-	-	-	-	-	-	-	-	-	-	-	-	-	-	-	-	-
TRINITY_DN5810_c0_g1	18.3603	3.3022	2.4751	0.0078833	1	gi|915158549|ref|XP_013329254.1|	915158549	288	1.42e-88	SUN domain protein (Uth1) [Rasamsonia emersonii CBS 393.64]	-	-	-	-	-	gi|1171667|sp|P46955.1|NCA3_YEAST	1171667	244	2.4e-74	RecName: Full=Beta-glucosidase-like protein NCA3, mitochondrial; Flags: Precursor	-	-	-	-	-	-	-	-	-	-	PF03856.13	SUN	-	-	-	-	-	-
TRINITY_DN41711_c0_g1	16.099	2.90117	2.4723	0.014202	1	gi|1035641547|gb|OAX83265.1|	1035641547	107	5.46e-24	hypothetical protein ACJ72_02376 [Emmonsia sp. CAC-2015a]	-	-	-	-	-	-	-	-	-	-	-	-	-	-	-	-	-	-	-	-	PF14618.6	DUF4452	-	-	-	-	-	-
TRINITY_DN49831_c1_g1	16.5083	2.9941	2.463	0.015877	1	gi|582955669|gb|EWC43909.1|	582955669	321	4.92e-109	60S ribosomal protein L11 [Drechslerella stenobrocha 248]	gi|1383858846|ref|XM_024853891.1|	1383858846	444	3.57e-120	Aspergillus steynii IBT 23096 60S ribosomal protein L11 (P170DRAFT_483080), partial mRNA	gi|51704291|sp|P46222.2|RL11_DROME	51704291	264	7.38e-88	RecName: Full=60S ribosomal protein L11	-	-	-	-	-	-	-	KOG0397	J	60S ribosomal protein L11	PF00281.19//PF00673.21	Ribosomal_L5//Ribosomal_L5_C	GO:0006412//GO:0000027	translation//ribosomal large subunit assembly	GO:0019843//GO:0003735	rRNA binding//structural constituent of ribosome	GO:0022625	cytosolic large ribosomal subunit
TRINITY_DN92480_c0_g1	11.1595	2.04868	2.4455	0.039366	1	gi|296423176|ref|XP_002841131.1|	296423176	250	2.43e-75	hypothetical protein [Tuber melanosporum Mel28]	gi|915118537|ref|XM_013434695.1|	915118537	174	7e-39	Fonsecaea pedrosoi CBS 271.37 hypothetical protein partial mRNA	gi|731908|sp|P40565.1|IST3_YEAST	731908	50.4	2.38e-06	RecName: Full=U2 snRNP component IST3; AltName: Full=Increased sodium tolerance protein 3; AltName: Full=U2 snRNP protein SNU17	--	--	--	--	K13201	nucleolysin TIA-1/TIAR	--	KOG0148	AJ	Apoptosis-promoting RNA-binding protein TIA-1/TIAR (RRM superfamily)	PF00076.22	RRM_1	GO:0043488//GO:0034063//GO:0000184	regulation of mRNA stability//stress granule assembly//nuclear-transcribed mRNA catabolic process, nonsense-mediated decay	GO:0003729//GO:0008266//GO:0000166	mRNA binding//poly(U) RNA binding//nucleotide binding	GO:0010494//GO:0000932//GO:0005634	cytoplasmic stress granule//P-body//nucleus
TRINITY_DN32517_c0_g1	14.0216	2.59002	2.4366	0.022952	1	gi|407921423|gb|EKG14571.1|	407921423	126	3.12e-36	Ribosomal protein L38e [Macrophomina phaseolina MS6]	gi|588253005|ref|XM_006955623.1|	588253005	91.6	2.4e-14	Wallemia mellicola CBS 633.66 ribosomal protein L38e partial mRNA	gi|122048954|sp|Q4GX86.1|RL38_TIMBA	122048954	90.5	1.5e-23	RecName: Full=60S ribosomal protein L38 [Timarcha balearica]	-	-	-	-	-	-	-	-	-	-	PF01781.18	Ribosomal_L38e	GO:0006412	translation	GO:0003735	structural constituent of ribosome	GO:0022625	cytosolic large ribosomal subunit
TRINITY_DN38430_c0_g1	19.3198	3.62225	2.4151	0.022099	1	gi|549042606|emb|CCX34741.1|	549042606	279	1.55e-89	Similar to hypothetical protein AOL_s00079g90 [Arthrobotrys oligospora ATCC 24927]; acc. no. EGX48869 [Pyronema omphalodes CBS 100304]	-	-	-	-	-	gi|74582892|sp|O94440.1|YFE3_SCHPO	74582892	51.2	6.05e-06	RecName: Full=Uncharacterized protein C637.03	-	-	-	-	-	-	-	-	-	-	PF08611.10	DUF1774	-	-	-	-	-	-
TRINITY_DN51812_c0_g1	15.8039	2.9941	2.4001	0.022278	1	gi|944067213|gb|KQK02697.1|	944067213	169	5.78e-43	hypothetical protein BRADI_2g03130v3 [Brachypodium distachyon]	gi|937924750|dbj|AP014963.1|	937924750	97.1	2.09e-15	Oryza sativa Japonica Group DNA, chromosome 7, cultivar: Nipponbare, complete sequence	-	-	-	-	-	-	-	-	-	-	-	-	-	-	-	PF13365.6	Trypsin_2	-	-	-	-	-	-
TRINITY_DN39668_c0_g2	31.3316	5.9416	2.3987	0.00075604	1	gi|85082294|ref|XP_956886.1|	85082294	660	0	plasma membrane ATPase [Neurospora crassa OR74A]	gi|336271942|ref|XM_003350681.1|	336271942	976	0	Sordaria macrospora k-hell uncharacterized protein (SMAC_02399), partial mRNA	gi|12585313|sp|Q43128.2|PMA10_ARATH	12585313	200	3.11e-54	RecName: Full=ATPase 10, plasma membrane-type; AltName: Full=Proton pump 10	Metabolism	Energy metabolism	Oxidative phosphorylation	ko00190	K01535	H+-transporting ATPase	3.6.3.6	-	-	-	PF00702.26	Hydrolase	GO:0051453//GO:0006754//GO:1902600	regulation of intracellular pH//ATP biosynthetic process//proton transmembrane transport	GO:0008553//GO:0046872//GO:0005524	proton-exporting ATPase activity, phosphorylative mechanism//metal ion binding//ATP binding	GO:0005887//GO:0043231	integral component of plasma membrane//intracellular membrane-bounded organelle
TRINITY_DN48033_c2_g1	24.8296	4.71967	2.3953	0.0023146	1	gi|549048358|emb|CCX31931.1|	549048358	299	2.21e-100	Similar to 60S ribosomal protein L9-B; acc. no. P51401 [Pyronema omphalodes CBS 100304]	gi|827062425|ref|XM_008094585.1|	827062425	217	8.2e-52	Colletotrichum graminicola M1.001 ribosomal protein L6 partial mRNA	gi|21759393|sp|Q963B7.1|RL9_SPOFR	21759393	191	4.01e-59	RecName: Full=60S ribosomal protein L9	-	-	-	-	-	-	-	KOG3255	J	60S ribosomal protein L9	PF00347.23	Ribosomal_L6	GO:0006412	translation	GO:0003735//GO:0019843	structural constituent of ribosome//rRNA binding	GO:0005840	ribosome
TRINITY_DN53494_c0_g2	13.6162	2.59002	2.3943	0.026435	1	gi|1018273990|gb|KZF26083.1|	1018273990	303	2.33e-97	general substrate transporter [Xylona heveae TC161]	gi|312215239|emb|FP929127.1|	312215239	176	1.36e-39	Leptosphaeria maculans JN3 lm_SuperContig_2_v2 genomic supercontig, whole genome, isolate v23.1.3	gi|3915704|sp|P13181.3|GAL2_YEAST	3915704	152	9.47e-41	RecName: Full=Galactose transporter; AltName: Full=Galactose permease	-	-	-	-	-	-	-	KOG0254	R	Predicted transporter (major facilitator superfamily)	PF00083.24	Sugar_tr	GO:0055085//GO:0008643	transmembrane transport//carbohydrate transport	--	--	GO:0016021//GO:0022891	integral component of membrane//
TRINITY_DN28958_c0_g1	12.107	2.31045	2.3896	0.036667	1	gi|474243757|gb|EMS59894.1|	474243757	323	2.54e-99	hypothetical protein TRIUR3_16939 [Triticum urartu]	-	-	-	-	-	-	-	-	-	-	-	-	-	-	-	-	-	-	-	-	-	-	-	-	-	-	-	-
TRINITY_DN193264_c0_g1	12.5866	2.43391	2.3705	0.031654	1	gi|326504742|dbj|BAK06662.1|	326504742	369	6.47e-125	predicted protein [Hordeum vulgare subsp. vulgare]	gi|1102535182|ref|XM_019190251.1|	1102535182	588	1.56e-163	Kwoniella bestiolae CBS 10118 50S small subunit ribosomal protein L4e partial mRNA	gi|292495032|sp|P02385.2|RL4B_XENLA	292495032	246	7.47e-78	RecName: Full=60S ribosomal protein L4-B; AltName: Full=L1B	Genetic Information Processing	Translation	Ribosome	ko03010	K02930	large subunit ribosomal protein L4e	--	-	-	-	PF00573.22//PF14374.6	Ribosomal_L4//Ribos_L4_asso_C	GO:0006412	translation	GO:0003735	structural constituent of ribosome	GO:0022625	cytosolic large ribosomal subunit
TRINITY_DN43012_c0_g1	50.2187	9.76045	2.3632	4.7022e-05	0.20862	gi|549050572|emb|CCX10373.1|	549050572	94.4	6.72e-20	Similar to extracellular serine-threonine rich protein [Aspergillus oryzae RIB40]; acc. no. XP_001820093 [Pyronema omphalodes CBS 100304]	-	-	-	-	-	-	-	-	-	-	-	-	-	-	-	-	-	-	-	-	PF10342.9	GPI-anchored	-	-	-	-	-	-
TRINITY_DN70168_c0_g1	18.7667	3.65384	2.3607	0.0093822	1	gi|1027161279|gb|OAG21653.1|	1027161279	365	5.2e-123	Phox-like protein [Alternaria alternata]	gi|953436008|ref|XM_014704590.1|	953436008	285	3.95e-72	Bipolaris victoriae FI3 hypothetical protein partial mRNA	gi|23822179|sp|Q91ZR2.1|SNX18_MOUSE	23822179	53.1	4.32e-06	RecName: Full=Sorting nexin-18; AltName: Full=Sorting nexin-associated Golgi protein 1	-	-	-	-	-	-	-	-	-	-	PF00787.24	PX	GO:0006897//GO:0016573//GO:0016050	endocytosis//histone acetylation//vesicle organization	GO:0035091	phosphatidylinositol binding	GO:0019898//GO:0005768	extrinsic component of membrane//endosome
TRINITY_DN41218_c0_g1	41.7025	8.13949	2.3571	0.00017212	0.46995	gi|549046003|emb|CCX33024.1|	549046003	345	1.09e-114	Similar to Glucan 1,3-beta-glucosidase; acc. no. P15703 [Pyronema omphalodes CBS 100304]	-	-	-	-	-	gi|298351643|sp|A1DJ47.1|EGLC_NEOFI	298351643	114	1.27e-26	RecName: Full=Probable glucan endo-1,3-beta-glucosidase eglC; AltName: Full=Endo-1,3-beta-glucanase eglC; AltName: Full=Laminarinase eglC; Flags: Precursor	-	-	-	-	-	-	-	-	-	-	PF00332.18	Glyco_hydro_17	-	-	-	-	-	-
TRINITY_DN43861_c0_g1	27.8659	5.45071	2.354	0.041738	1	gi|748509918|ref|XP_011123142.1|	748509918	724	0	hypothetical protein AOL_s00081g21 [Arthrobotrys oligospora ATCC 24927]	gi|238485659|ref|XM_002374027.1|	238485659	67.6	1.71e-06	Aspergillus flavus NRRL3357 hexose transporter protein (AFLA_025570), partial mRNA	gi|729939|sp|P40885.1|HXT9_YEAST	729939	142	5.79e-35	RecName: Full=Hexose transporter HXT9	-	-	-	-	-	-	-	KOG0254	R	Predicted transporter (major facilitator superfamily)	PF00083.24	Sugar_tr	GO:0055085	transmembrane transport	--	--	GO:0016021//GO:0022891	integral component of membrane//
TRINITY_DN30745_c0_g1	13.0366	2.55843	2.3492	0.034082	1	gi|296418056|ref|XP_002838660.1|	296418056	316	4.6e-107	60S ribosomal protein L10 [Tuber melanosporum Mel28]	gi|627818608|ref|XM_007683954.1|	627818608	385	1.95e-102	Bipolaris oryzae ATCC 44560 hypothetical protein partial mRNA	gi|122240410|sp|Q0ITS8.1|RL101_ORYSJ	122240410	211	4.03e-67	RecName: Full=60S ribosomal protein L10-1; AltName: Full=Protein QM; AltName: Full=Putative tumor suppressor SC34	-	-	-	-	-	-	-	-	-	-	PF00252.18//PF11314.8	Ribosomal_L16//DUF3117	GO:0006412	translation	GO:0003735	structural constituent of ribosome	GO:0005840	ribosome
TRINITY_DN31915_c0_g1	12.4096	2.44387	2.3442	0.044504	1	gi|597584259|ref|XP_007295186.1|	597584259	173	2.02e-51	60S ribosomal protein L14 [Marssonina brunnea f. sp. 'multigermtubi' MB_m1]	-	-	-	-	-	gi|38258424|sp|Q7XYA7.1|RL14_GRIJA	38258424	98.2	4.83e-24	RecName: Full=60S ribosomal protein L14 [Griffithsia japonica]	Genetic Information Processing	Translation	Ribosome	ko03010	K02875	large subunit ribosomal protein L14e	--	KOG3421	J	60S ribosomal protein L14	PF00467.29//PF01929.17	KOW//Ribosomal_L14e	--	--	--	--	GO:0044444//GO:0043229	cytoplasmic part//intracellular organelle
TRINITY_DN49549_c1_g1	22.7648	4.49944	2.339	0.0049076	1	gi|636754133|ref|XP_008079240.1|	636754133	462	1.55e-162	Translation proteins SH3-like protein [Glarea lozoyensis ATCC 20868]	gi|627831065|ref|XM_007688625.1|	627831065	549	8.67e-152	Bipolaris oryzae ATCC 44560 hypothetical protein partial mRNA	gi|51701901|sp|Q9V3G1.1|RL8_DROME	51701901	366	5.1e-126	RecName: Full=60S ribosomal protein L8	Genetic Information Processing	Translation	Ribosome	ko03010	K02938	large subunit ribosomal protein L8e	--	KOG2309	J	60s ribosomal protein L2/L8	PF00181.23//PF03947.18	Ribosomal_L2//Ribosomal_L2_C	GO:0002181	cytoplasmic translation	GO:0003735	structural constituent of ribosome	GO:0022625	cytosolic large ribosomal subunit
TRINITY_DN59166_c1_g1	13.3707	2.6552	2.3322	0.029551	1	gi|474012428|gb|EMS52594.1|	474012428	66.2	1.16e-10	Ankyrin repeat domain-containing protein 49 [Triticum urartu]	gi|1256265671|ref|XM_004951126.4|	1256265671	108	6.21e-19	PREDICTED: Setaria italica phytochrome-interacting ankyrin-repeat protein 2 (LOC101759897), mRNA	-	-	-	-	-	-	-	-	-	-	-	-	KOG0504	R	FOG: Ankyrin repeat	PF00283.19	Cytochrom_B559	-	-	-	-	-	-
TRINITY_DN42399_c0_g1	70.1372	13.9823	2.3266	4.3259e-06	0.038386	gi|296411010|ref|XP_002835228.1|	296411010	495	1.59e-168	hypothetical protein [Tuber melanosporum Mel28]	gi|1383784043|ref|XM_024820430.1|	1383784043	73.1	3.66e-08	Aspergillus candidus Glucanosyltransferase-domain-containing protein (BDW47DRAFT_97461), mRNA	gi|353526269|sp|O13318.2|PHR2_CANAL	353526269	243	9.18e-72	RecName: Full=pH-responsive protein 2; AltName: Full=pH-regulated protein 2; Flags: Precursor	-	-	-	-	-	-	-	-	-	-	PF03198.14	Glyco_hydro_72	--	--	GO:0016740	transferase activity	GO:0016020//GO:0071944	membrane//cell periphery
TRINITY_DN43907_c0_g1	28.7508	5.75496	2.3207	0.0018928	1	gi|296816953|ref|XP_002848813.1|	296816953	105	1.82e-27	hypothetical protein MCYG_01747 [Microsporum canis CBS 113480]	gi|970918905|ref|XM_015270632.1|	970918905	100	5e-17	PREDICTED: Diachasma alloeum 60S ribosomal protein L39 (LOC107047795), mRNA	gi|205829460|sp|Q59GN2.2|R39L5_HUMAN	205829460	80.1	2.27e-19	RecName: Full=Putative 60S ribosomal protein L39-like 5; AltName: Full=60S ribosomal protein L39 pseudogene 5	Genetic Information Processing	Translation	Ribosome	ko03010	K02924	large subunit ribosomal protein L39e	--	-	-	-	PF00832.20	Ribosomal_L39	GO:0002181	cytoplasmic translation	GO:0003735//GO:0003723	structural constituent of ribosome//RNA binding	GO:0022625	cytosolic large ribosomal subunit
TRINITY_DN47808_c2_g4	55.8384	11.2739	2.3083	4.3318e-05	0.205	gi|473927061|gb|EMS49871.1|	473927061	292	6.27e-79	Coatomer subunit beta'-2 [Triticum urartu]	gi|1205959564|ref|XM_021461416.1|	1205959564	106	7.79e-18	PREDICTED: Sorghum bicolor cysteine-rich receptor-like protein kinase 28 (LOC8072776), transcript variant X1, mRNA	gi|544076|sp|P35606.2|COPB2_HUMAN	544076	178	2.93e-44	RecName: Full=Coatomer subunit beta'; AltName: Full=Beta'-coat protein; Short=Beta'-COP; AltName: Full=p102	-	-	-	-	-	-	-	KOG0276	U	Vesicle coat complex COPI, beta' subunit	PF07114.11//PF03283.13//PF00635.26//PF00400.32	TMEM126//PAE//Motile_Sperm//WD40	-	-	-	-	-	-
TRINITY_DN1499_c0_g1	16.5027	3.35848	2.2968	0.016558	1	gi|1027156580|gb|OAG16966.1|	1027156580	345	8.55e-119	hypothetical protein CC77DRAFT_1012007 [Alternaria alternata]	gi|1070559039|ref|XM_018531399.1|	1070559039	108	4.66e-19	Alternaria alternata hypothetical protein mRNA	-	-	-	-	-	-	-	-	-	-	-	-	-	-	-	-	-	--	--	--	--	GO:0016021	integral component of membrane
TRINITY_DN47948_c0_g1	14.7863	3.01574	2.2937	0.023424	1	gi|669029343|emb|CDM83514.1|	669029343	78.2	6.97e-13	unnamed protein product [Triticum aestivum]	gi|409102095|emb|HE996523.1|	409102095	171	8.23e-38	Triticum aestivum cv. Arina SNP, chromosome 3B, clone Taes_arina_ctg_58237	gi|75149547|sp|Q851V1.1|Y3160_ORYSJ	75149547	82	3.15e-16	RecName: Full=Putative B3 domain-containing protein Os03g0621600	-	-	-	-	-	-	-	-	-	-	PF02362.21	B3	GO:0006351	transcription, DNA-templated	--	--	--	--
TRINITY_DN65389_c1_g1	16.7134	3.41092	2.2928	0.020322	1	gi|357123022|ref|XP_003563212.1|	357123022	89.4	3.6e-17	ADP,ATP carrier protein ER-ANT1 [Brachypodium distachyon]	-	-	-	-	-	gi|3334117|sp|Q41630.1|ADT2_WHEAT	3334117	75.1	1.09e-13	RecName: Full=ADP,ATP carrier protein 2, mitochondrial; AltName: Full=ADP/ATP translocase 2; AltName: Full=Adenine nucleotide translocator 2; Short=ANT 2; Flags: Precursor	-	-	-	-	-	-	-	KOG0749	C	Mitochondrial ADP/ATP carrier proteins	PF00153.27	Mito_carr	--	--	--	--	GO:0044699//GO:0016020	//membrane
TRINITY_DN31642_c0_g1	23.2823	4.75432	2.2919	0.0056893	1	gi|473923527|gb|EMS49783.1|	473923527	53.1	1.06e-34	hypothetical protein TRIUR3_06504 [Triticum urartu]	-	-	-	-	-	-	-	-	-	-	-	-	-	-	-	-	-	-	-	-	-	-	-	-	-	-	-	-
TRINITY_DN60747_c1_g2	28.7752	5.93776	2.2768	0.0024958	1	gi|937894527|dbj|BAS70507.1|	937894527	524	2.12e-175	Os01g0158850 [Oryza sativa Japonica Group]	gi|1149770643|ref|XM_020294061.1|	1149770643	608	2.08e-169	PREDICTED: Aegilops tauschii subsp. tauschii uncharacterized LOC109734878 (LOC109734878), mRNA	gi|60392921|sp|P11369.2|LORF2_MOUSE	60392921	58.9	9.7e-08	RecName: Full=LINE-1 retrotransposable element ORF2 protein; Short=ORF2p; AltName: Full=Long interspersed element-1; Short=L1; AltName: Full=Retrovirus-related Pol polyprotein LINE-1; Includes: RecName: Full=Reverse transcriptase; Includes: RecName: Full=Endonuclease	-	-	-	-	-	-	-	KOG1075	R	FOG: Reverse transcriptase	PF00078.27//PF13966.6	RVT_1//zf-RVT	GO:0043170//GO:0044238	macromolecule metabolic process//primary metabolic process	GO:0004180	carboxypeptidase activity	GO:0005739	mitochondrion
TRINITY_DN42839_c0_g1	15.5742	3.22123	2.2735	0.038907	1	gi|734318795|gb|KHN03134.1|	734318795	186	9.45e-57	50S ribosomal protein L13, partial [Glycine soja]	gi|1601844036|gb|CP038026.1|	1601844036	1079	0	Massilia plicata strain DSM 17505 chromosome, complete genome	gi|118573435|sp|Q1LRD0.1|RL13_RALME	118573435	250	2.58e-83	RecName: Full=50S ribosomal protein L13	Genetic Information Processing	Translation	Ribosome	ko03010	K02871	large subunit ribosomal protein L13	--	KOG3203	J	Mitochondrial/chloroplast ribosomal protein L13	PF00572.18//PF00380.19	Ribosomal_L13//Ribosomal_S9	GO:0044260//GO:0009059//GO:0044271//GO:0044238	cellular macromolecule metabolic process//macromolecule biosynthetic process//cellular nitrogen compound biosynthetic process//primary metabolic process	--	--	GO:0030529//GO:0009536	//plastid
TRINITY_DN57680_c2_g2	28.0986	5.92381	2.2459	0.017632	1	gi|937903170|dbj|BAS78224.1|	937903170	507	2.24e-176	Os02g0297132 [Oryza sativa Japonica Group]	gi|32986112|dbj|AK100903.1|	32986112	424	7.21e-114	Oryza sativa Japonica Group cDNA clone:J023131M05, full insert sequence	gi|54035876|sp|Q8YM56.2|CLPB2_NOSS1	54035876	315	6.45e-97	RecName: Full=Chaperone protein ClpB 2	--	--	--	--	K03695	ATP-dependent Clp protease ATP-binding subunit ClpB	--	KOG1051	O	Chaperone HSP104 and related ATP-dependent Clp proteases	PF17871.1//PF07724.14//PF10431.9	AAA_lid_9//AAA_2//ClpB_D2-small	--	--	GO:0005524	ATP binding	--	--
TRINITY_DN37755_c1_g1	22.6625	4.78791	2.2428	0.0065538	1	gi|1000225376|gb|KXJ94378.1|	1000225376	116	5.64e-32	ribosomal protein S30 [Microdochium bolleyi]	gi|1377714451|ref|XM_024695191.1|	1377714451	147	6.33e-31	Botrytis cinerea B05.10 hypothetical protein (BCIN_09g04950), mRNA	gi|122057699|sp|Q556Y1.1|RS30_DICDI	122057699	57.4	2.02e-10	RecName: Full=40S ribosomal protein S30	-	-	-	-	-	-	-	-	-	-	PF04758.14//PF11626.8	Ribosomal_S30//Rap1_C	GO:0006412	translation	GO:0003735	structural constituent of ribosome	GO:0022627	cytosolic small ribosomal subunit
TRINITY_DN63304_c2_g2	20.8567	4.43043	2.235	0.013122	1	gi|763775406|gb|KJB42529.1|	763775406	88.2	9.04e-17	hypothetical protein B456_007G156600 [Gossypium raimondii]	-	-	-	-	-	-	-	-	-	-	-	-	-	-	-	-	-	-	-	-	PF02892.15	zf-BED	--	--	GO:0005488	binding	--	--
TRINITY_DN15785_c0_g1	17.1161	3.65384	2.2279	0.01738	1	gi|1027165711|gb|OAG26078.1|	1027165711	329	7.9e-109	hypothetical protein CC77DRAFT_924128 [Alternaria alternata]	gi|1235732217|gb|CP022870.1|	1235732217	270	7.33e-68	Parastagonospora nodorum isolate Sn79-1087 chromosome 18 sequence	-	-	-	-	-	-	-	-	-	-	-	-	-	-	-	PF01437.25	PSI	-	-	-	-	-	-
TRINITY_DN41285_c0_g1	29.1453	6.22701	2.2267	0.0016015	1	gi|1028894953|gb|OAK97217.1|	1028894953	185	3.15e-56	hypothetical protein IQ06DRAFT_358578 [Stagonospora sp. SRC1lsM3a]	-	-	-	-	-	-	-	-	-	-	-	-	-	-	-	-	-	-	-	-	PF14273.6	DUF4360	-	-	-	-	-	-
TRINITY_DN37795_c0_g1	17.2974	3.71902	2.2176	0.015529	1	gi|1027160243|gb|OAG20619.1|	1027160243	261	1.18e-86	hypothetical protein CC77DRAFT_1061198 [Alternaria alternata]	gi|1607835605|ref|XM_028656565.1|	1607835605	647	0	Alternaria arborescens hypothetical protein (AA0111_g9949), partial mRNA	-	-	-	-	-	-	-	-	-	-	-	-	-	-	-	-	-	-	-	-	-	-	-
TRINITY_DN46912_c4_g5	13.2848	2.86069	2.2153	0.040297	1	gi|296417825|ref|XP_002838551.1|	296417825	194	9.84e-62	hypothetical protein [Tuber melanosporum Mel28]	gi|5831966|emb|AL116750.1|	5831966	246	6.79e-61	Botrytis cinerea strain T4 cDNA library	gi|20137645|sp|Q96VP3.1|CYC_COCLU	20137645	171	4.73e-54	RecName: Full=Cytochrome c	Human Diseases	Cardiovascular diseases	Viral myocarditis	ko05416	K08738	cytochrome c	--	-	-	-	PF00034.21	Cytochrom_C	GO:0055114	oxidation-reduction process	GO:0020037//GO:0046872//GO:0009055	heme binding//metal ion binding//electron transfer activity	GO:0070469//GO:0005739	respirasome//mitochondrion
TRINITY_DN78875_c0_g1	14.6307	3.15605	2.2128	0.032243	1	gi|1018268741|gb|KZF20842.1|	1018268741	176	1.1e-54	nascent polypeptide-associated complex subunit beta [Xylona heveae TC161]	gi|317033455|ref|XM_003188810.1|	317033455	99	1.54e-16	Aspergillus niger CBS 513.88 nascent polypeptide-associated complex subunit beta, mRNA	gi|143355011|sp|A1DL98.1|NACB_NEOFI	143355011	161	4.84e-50	RecName: Full=Nascent polypeptide-associated complex subunit beta; Short=NAC-beta; AltName: Full=Beta-NAC	--	--	--	--	K01527	nascent polypeptide-associated complex subunit beta	--	KOG2240	K	RNA polymerase II general transcription factor BTF3 and related proteins	PF01849.18	NAC	GO:0006355//GO:0015031	regulation of transcription, DNA-templated//protein transport	--	--	GO:0005737//GO:0005634	cytoplasm//nucleus
TRINITY_DN23945_c0_g1	12.5244	2.71148	2.2076	0.042505	1	gi|296412105|ref|XP_002835768.1|	296412105	249	7.85e-79	hypothetical protein [Tuber melanosporum Mel28]	-	-	-	-	-	gi|75163283|sp|Q93WI9.1|HD3A_ORYSJ	75163283	84.7	1.27e-18	RecName: Full=Protein HEADING DATE 3A; AltName: Full=FT-like protein A	-	-	-	-	-	-	-	KOG3346	R	Phosphatidylethanolamine binding protein	PF01161.20	PBP	-	-	-	-	-	-
TRINITY_DN56510_c1_g2	17.2615	3.75567	2.2004	0.02106	1	gi|474449852|gb|EMS68822.1|	474449852	62	6.15e-08	hypothetical protein TRIUR3_19321 [Triticum urartu]	gi|326511590|dbj|AK360732.1|	326511590	128	6.49e-25	Hordeum vulgare subsp. vulgare mRNA for predicted protein, complete cds, clone: NIASHv1124E18	-	-	-	-	-	-	-	-	-	-	-	-	-	-	-	-	-	--	--	--	--	GO:0016020	membrane
TRINITY_DN47384_c3_g2	34.486	7.54599	2.1922	0.0017164	1	gi|258575597|ref|XP_002541980.1|	258575597	83.6	1.45e-18	60S acidic ribosomal protein P2 [Uncinocarpus reesii 1704]	gi|694529023|ref|XM_009495195.1|	694529023	87.9	3.91e-13	Fonticula alba 50S ribosomal protein LP1 mRNA	gi|133064|sp|P08094.1|RLA2_SCHPO	133064	68.9	2.51e-14	RecName: Full=60S acidic ribosomal protein P2-alpha; Short=A2; AltName: Full=L12EI; AltName: Full=L40C	Genetic Information Processing	Translation	Ribosome	ko03010	K02943	large subunit ribosomal protein LP2	--	-	-	-	PF00428.19	Ribosomal_60s	GO:0006414	translational elongation	GO:0003735	structural constituent of ribosome	GO:0005840	ribosome
TRINITY_DN51878_c1_g4	20.2917	4.48259	2.1785	0.009061	1	gi|296416033|ref|XP_002837685.1|	296416033	52.4	3.2e-06	hypothetical protein [Tuber melanosporum Mel28]	-	-	-	-	-	-	-	-	-	-	-	-	-	-	-	-	-	-	-	-	-	-	-	-	-	-	-	-
TRINITY_DN6579_c0_g1	29.2799	6.47404	2.1772	0.0025773	1	gi|296413376|ref|XP_002836390.1|	296413376	183	3.45e-56	60S ribosomal protein L24 [Tuber melanosporum Mel28]	gi|734686015|ref|XM_010764935.1|	734686015	89.8	1.38e-13	Paracoccidioides brasiliensis Pb18 60S ribosomal protein L24 partial mRNA	gi|52783247|sp|Q6C4U6.1|RL24_YARLI	52783247	146	2.64e-43	RecName: Full=60S ribosomal protein L24	-	-	-	-	-	-	-	KOG1722	J	60s ribosomal protein L24	PF01246.20	Ribosomal_L24e	--	--	--	--	GO:0005840	ribosome
TRINITY_DN43866_c1_g1	43.55	9.74849	2.1594	0.0018193	1	gi|1028536970|gb|OAJ09263.1|	1028536970	233	9.77e-67	hypothetical protein A4X09_g7752, partial [Tilletia walkeri]	-	-	-	-	-	-	-	-	-	-	-	-	-	-	-	-	-	-	-	-	-	-	-	-	-	-	-	-
TRINITY_DN49961_c2_g1	15.4655	3.4761	2.1535	0.038057	1	gi|695060369|ref|XP_009418571.1|	695060369	35.8	4.89e-17	PREDICTED: V-type proton ATPase catalytic subunit A isoform X1 [Musa acuminata subsp. malaccensis]	gi|1377124382|gb|MF443754.1|	1377124382	67.6	1.06e-06	Hordeum vulgare subsp. vulgare cultivar Re08 clone Hvu-B-Re08_ng-19J19 Rfm1 gene locus, partial sequence	gi|137464|sp|P17255.3|VATA_YEAST	137464	47.8	1.83e-13	RecName: Full=V-type proton ATPase catalytic subunit A; Short=V-ATPase subunit A; AltName: Full=Vacuolar proton pump subunit A; Contains: RecName: Full=Endonuclease PI-SceI; AltName: Full=Sce VMA intein; AltName: Full=VMA1-derived endonuclease; Short=VDE	Human Diseases	Immune diseases	Rheumatoid arthritis	ko05323	K02145	V-type H+-transporting ATPase subunit A	3.6.3.14	KOG1352	C	Vacuolar H+-ATPase V1 sector, subunit A	PF00006.25//PF16886.5	ATP-synt_ab//ATP-synt_ab_Xtn	-	-	-	-	-	-
TRINITY_DN195316_c0_g1	14.1935	3.19654	2.1507	0.03989	1	gi|1027162886|gb|OAG23257.1|	1027162886	438	1.64e-145	hypothetical protein CC77DRAFT_1006641 [Alternaria alternata]	gi|628198012|ref|XM_007712011.1|	628198012	180	1.31e-40	Bipolaris zeicola 26-R-13 hypothetical protein partial mRNA	-	-	-	-	-	-	-	-	-	-	-	-	-	-	-	-	-	GO:0006351	transcription, DNA-templated	GO:0003677//GO:0008270	DNA binding//zinc ion binding	GO:0005634	nucleus
TRINITY_DN38851_c0_g1	27.9083	6.34063	2.138	0.0032872	1	gi|918816268|ref|XP_013428114.1|	918816268	68.2	5.55e-11	hypothetical protein M436DRAFT_63185 [Aureobasidium namibiae CBS 147.97]	-	-	-	-	-	-	-	-	-	-	-	-	-	-	-	-	-	-	-	-	-	-	-	-	-	-	-	-
TRINITY_DN42838_c0_g1	14.9648	3.40786	2.1346	0.027739	1	gi|358054720|dbj|GAA99646.1|	358054720	198	7.29e-62	hypothetical protein E5Q_06347 [Mixia osmundae IAM 14324]	gi|685857308|ref|XM_009257412.1|	685857308	108	4.14e-19	Fusarium pseudograminearum CS3096 hypothetical protein partial mRNA	gi|23397340|sp|P18203.2|FKB1A_BOVIN	23397340	145	1.71e-43	RecName: Full=Peptidyl-prolyl cis-trans isomerase FKBP1A; Short=PPIase FKBP1A; AltName: Full=12 kDa FK506-binding protein; Short=12 kDa FKBP; Short=FKBP-12; AltName: Full=Calstabin-1; AltName: Full=FK506-binding protein 1A; Short=FKBP-1A; AltName: Full=Immunophilin FKBP12; AltName: Full=Rotamase	--	--	--	--	K09568	FK506-binding protein 1	5.2.1.8	-	-	-	PF00254.28	FKBP_C	GO:0006457//GO:0031929//GO:0000413	protein folding//TOR signaling//protein peptidyl-prolyl isomerization	GO:0003755	peptidyl-prolyl cis-trans isomerase activity	GO:0005634//GO:0005829	nucleus//cytosol
TRINITY_DN103579_c0_g1	15.0502	3.45141	2.1245	0.036695	1	gi|627825400|ref|XP_007685045.1|	627825400	132	5.22e-38	hypothetical protein COCMIDRAFT_87475, partial [Bipolaris oryzae ATCC 44560]	gi|1625773147|gb|CP039614.1|	1625773147	75	2.89e-09	Pichia kudriavzevii strain CY902 chromosome IV	gi|75186120|sp|Q9M7X7.1|RL291_ARATH	75186120	56.2	4.91e-10	RecName: Full=60S ribosomal protein L29-1	Genetic Information Processing	Translation	Ribosome	ko03010	K02905	large subunit ribosomal protein L29e	--	-	-	-	PF01779.17	Ribosomal_L29e	GO:0002181	cytoplasmic translation	GO:0003735	structural constituent of ribosome	GO:0022625	cytosolic large ribosomal subunit
TRINITY_DN15292_c0_g1	58.0509	13.3769	2.1176	0.0027265	1	gi|42407614|dbj|BAD08729.1|	42407614	251	5.66e-70	F-box protein family-like [Oryza sativa Japonica Group]	-	-	-	-	-	gi|75273931|sp|Q9LSA5.1|FBK62_ARATH	75273931	74.3	9.8e-13	RecName: Full=F-box/kelch-repeat protein At3g18720	-	-	-	-	-	-	-	-	-	-	PF03478.18	DUF295	-	-	-	-	-	-
TRINITY_DN44673_c0_g1	19.0853	4.40267	2.116	0.017697	1	gi|514815824|ref|XP_004982660.1|	514815824	63.2	2.75e-10	uncharacterized protein LOC101784837 [Setaria italica]	gi|1314995989|ref|XM_023301335.1|	1314995989	87.9	4.98e-13	PREDICTED: Zea mays uncharacterized LOC111590559 (LOC111590559), mRNA	-	-	-	-	-	-	-	-	-	-	-	-	-	-	-	-	-	--	--	--	--	GO:0016021	integral component of membrane
TRINITY_DN13181_c0_g1	20.6199	4.86888	2.0824	0.01393	1	gi|296412878|ref|XP_002836146.1|	296412878	265	5.7e-88	60S ribosomal protein L28 [Tuber melanosporum Mel28]	gi|5827094|emb|AL112475.1|	5827094	248	2.55e-61	Botrytis cinerea strain T4 cDNA library	gi|1173017|sp|P46776.2|RL27A_HUMAN	1173017	193	4.08e-61	RecName: Full=60S ribosomal protein L27a	Genetic Information Processing	Translation	Ribosome	ko03010	K02900	large subunit ribosomal protein L27Ae	--	KOG1742	J	60s ribosomal protein L15/L27	PF10492.9//PF00828.19	Nrf1_activ_bdg//Ribosomal_L27A	GO:0006412	translation	GO:0003735//GO:0003723	structural constituent of ribosome//RNA binding	GO:0015934//GO:0005634	large ribosomal subunit//nucleus
TRINITY_DN51571_c0_g3	13.5504	3.20543	2.0797	0.046416	1	gi|326491733|dbj|BAJ94344.1|	326491733	41.6	1.68e-10	predicted protein [Hordeum vulgare subsp. vulgare]	gi|1251767776|dbj|AK449671.1|	1251767776	586	6.9e-163	Triticum aestivum mRNA, clone: tplb0030f08, cultivar Chinese Spring	-	-	-	-	-	-	-	-	-	-	-	-	-	-	-	-	-	-	-	-	-	-	-
TRINITY_DN48855_c0_g1	29.5013	7.01326	2.0726	0.0024015	1	gi|701777823|gb|KGQ11489.1|	701777823	63.2	2.48e-08	Basal-body rod modification protein flgD [Beauveria bassiana D1-5]	-	-	-	-	-	gi|60392285|sp|P0A1I9.1|FLGD_SALTY	60392285	57	1.43e-07	RecName: Full=Basal-body rod modification protein FlgD	-	-	-	-	-	-	-	-	-	-	PF03963.14//PF13861.6//PF02120.16	FlgD//FLgD_tudor//Flg_hook	-	-	-	-	-	-
TRINITY_DN25661_c0_g1	29.1227	6.94025	2.0691	0.037829	1	gi|1032908438|gb|OAR02878.1|	1032908438	122	2.2e-26	hypothetical protein LLEC1_06783 [Cordyceps confragosa]	-	-	-	-	-	-	-	-	-	-	-	-	-	-	-	-	-	-	-	-	PF03572.18	Peptidase_S41	-	-	-	-	-	-
TRINITY_DN33496_c0_g1	15.6136	3.74371	2.0603	0.028406	1	gi|549055801|emb|CCX05413.1|	549055801	290	1.03e-93	Similar to Glucan 1,3-beta-glucosidase; acc. no. P15703 [Pyronema omphalodes CBS 100304]	-	-	-	-	-	gi|298351660|sp|A1CD22.1|EGLC_ASPCL	298351660	103	5.76e-23	RecName: Full=Probable glucan endo-1,3-beta-glucosidase eglC; AltName: Full=Endo-1,3-beta-glucanase eglC; AltName: Full=Laminarinase eglC; Flags: Precursor	-	-	-	-	-	-	-	-	-	-	PF00332.18	Glyco_hydro_17	--	--	GO:0004553	hydrolase activity, hydrolyzing O-glycosyl compounds	--	--
TRINITY_DN51704_c0_g1	20.5204	4.933	2.0565	0.010528	1	gi|11467492|ref|NP_043638.1|	11467492	127	2.07e-33	ribosomal protein L20 (chloroplast) [Trieres chinensis]	gi|1575585379|gb|CP035913.1|	1575585379	874	0	Massilia lutea strain DSM 17473 chromosome	gi|39931752|sp|Q7NYC3.1|RL20_CHRVO	39931752	179	1.28e-54	RecName: Full=50S ribosomal protein L20	Genetic Information Processing	Translation	Ribosome	ko03010	K02887	large subunit ribosomal protein L20	--	KOG4707	J	Mitochondrial/chloroplast ribosomal protein L20	PF02912.18//PF00453.18//PF01632.19	Phe_tRNA-synt_N//Ribosomal_L20//Ribosomal_L35p	GO:0000027	ribosomal large subunit assembly	GO:0003735//GO:0003723	structural constituent of ribosome//RNA binding	GO:0030529//GO:0009536	//plastid
TRINITY_DN17410_c0_g1	25.745	6.19064	2.0561	0.0083002	1	gi|526198376|gb|EPS39543.1|	526198376	316	3.2e-106	hypothetical protein H072_6613 [Dactylellina haptotyla CBS 200.50]	gi|1255187226|ref|XM_022821213.1|	1255187226	272	1.97e-68	Kluyveromyces marxianus DMKU3-1042 60S ribosomal protein L16-A (RPL16A), partial mRNA	gi|75077219|sp|Q4R8Z2.3|RL13A_MACFA	75077219	224	1.13e-71	RecName: Full=60S ribosomal protein L13a	Genetic Information Processing	Translation	Ribosome	ko03010	K02872	large subunit ribosomal protein L13Ae	--	KOG3204	J	60S ribosomal protein L13a	PF00572.18	Ribosomal_L13	GO:0006412	translation	GO:0003735	structural constituent of ribosome	GO:0015934	large ribosomal subunit
TRINITY_DN46684_c2_g3	19.6987	4.73852	2.0556	0.035548	1	gi|549055244|emb|CCX05992.1|	549055244	305	4.09e-103	Similar to 60S ribosomal protein L20-A; acc. no. P0CX23 [Pyronema omphalodes CBS 100304]	gi|1102185085|ref|XM_019170019.1|	1102185085	327	3.38e-85	Saitoella complicata NRRL Y-17804 ribosomal protein L18ae partial mRNA	gi|730537|sp|P41093.1|RL18A_DROME	730537	194	3.74e-61	RecName: Full=60S ribosomal protein L18a	-	-	-	-	-	-	-	KOG0829	J	60S ribosomal protein L18A	PF01775.17	Ribosomal_L18A	GO:0006412	translation	GO:0003735	structural constituent of ribosome	GO:0005840	ribosome
TRINITY_DN30424_c0_g1	27.4649	6.64795	2.0466	0.023762	1	gi|526204058|gb|EPS44304.1|	526204058	106	1.27e-21	hypothetical protein H072_1708 [Dactylellina haptotyla CBS 200.50]	-	-	-	-	-	gi|730057|sp|P39015.3|STM1_YEAST	730057	52.4	4.18e-06	RecName: Full=Suppressor protein STM1; AltName: Full=3BP1; AltName: Full=GU4 nucleic-binding protein 2; Short=G4p2 protein; AltName: Full=POP2 multicopy suppressor protein 4; AltName: Full=Ribosomal subunits association factor; Short=AF; AltName: Full=TOM1 suppressor protein 1; AltName: Full=Triplex-binding protein 1	-	-	-	-	-	-	-	-	-	-	PF09598.10//PF04774.15	Stm1_N//HABP4_PAI-RBP1	-	-	-	-	-	-
TRINITY_DN62877_c2_g3	20.9916	5.08327	2.046	0.015894	1	gi|474207226|gb|EMS58722.1|	474207226	62.4	6.21e-09	hypothetical protein TRIUR3_04387 [Triticum urartu]	-	-	-	-	-	-	-	-	-	-	-	-	-	-	-	-	-	-	-	-	-	-	-	-	-	-	-	-
TRINITY_DN41890_c0_g1	23.376	5.68089	2.0408	0.010951	1	gi|618816262|ref|XP_007310721.1|	618816262	253	1.89e-83	eukaryotic translation initiation factor 5A-2 [Stereum hirsutum FP-91666 SS1]	gi|1160566156|ref|XM_020580700.1|	1160566156	215	2.43e-51	Polysphondylium pallidum PN500 eukaryotic translation initiation factor 5A (eif5a), partial mRNA	gi|190359775|sp|Q6IS14.2|IF5AL_HUMAN	190359775	189	1.18e-59	RecName: Full=Eukaryotic translation initiation factor 5A-1-like; Short=eIF-5A-1-like; Short=eIF-5A1-like; AltName: Full=Eukaryotic initiation factor 5A isoform 1-like	--	--	--	--	K03263	translation initiation factor 5A	--	KOG3271	J	Translation initiation factor 5A (eIF-5A)	PF08207.12//PF01287.20	EFP_N//eIF-5a	GO:0006413//GO:0006452//GO:0045905//GO:0045901	translational initiation//translational frameshifting//positive regulation of translational termination//positive regulation of translational elongation	GO:0003743//GO:0003746//GO:0043022	translation initiation factor activity//translation elongation factor activity//ribosome binding	--	--
TRINITY_DN45944_c0_g1	16.3836	3.98279	2.0404	0.028831	1	gi|474302148|gb|EMS61653.1|	474302148	285	2.67e-91	hypothetical protein TRIUR3_01110 [Triticum urartu]	-	-	-	-	-	gi|125951933|sp|Q6ZQ89.2|MARH6_MOUSE	125951933	66.6	1.09e-10	RecName: Full=E3 ubiquitin-protein ligase MARCH6; AltName: Full=Membrane-associated RING finger protein 6; AltName: Full=Membrane-associated RING-CH protein VI; Short=MARCH-VI	-	-	-	-	-	-	-	KOG1609	A	Protein involved in mRNA turnover and stability	-	-	--	--	--	--	GO:0016020	membrane
TRINITY_DN43573_c0_g2	70.7915	17.5532	2.0118	0.0043454	1	gi|584406118|emb|CDM38209.1|	584406118	139	2.15e-38	Nucleotide-binding, alpha-beta plait [Penicillium roqueforti FM164]	gi|748491459|ref|XM_011121166.1|	748491459	108	4.85e-19	Arthrobotrys oligospora ATCC 24927 hypothetical protein mRNA	gi|284018072|sp|O93235.2|CIRBA_XENLA	284018072	84.3	1.43e-18	RecName: Full=Cold-inducible RNA-binding protein A; AltName: Full=Cold-inducible RNA-binding protein; Short=XCIRP; AltName: Full=Cold-inducible RNA-binding protein 1; Short=XCIRP-1; AltName: Full=Glycine-rich RNA-binding protein CIRP-A	-	-	-	-	-	-	-	KOG0118	R	FOG: RRM domain	PF00076.22	RRM_1	--	--	GO:0003676//GO:0000166	nucleic acid binding//nucleotide binding	--	--
TRINITY_DN60292_c1_g1	38.1876	9.52643	2.0031	0.043213	1	gi|802105262|gb|KKA30846.1|	802105262	219	2.76e-71	hypothetical protein TD95_000736 [Thielaviopsis punctulata]	gi|1489464994|ref|XM_026772040.1|	1489464994	625	7.29e-175	Aspergillus welwitschiae ubiquitin-related domain-containing protein (BDQ94DRAFT_172850), partial mRNA	gi|303308545|sp|P05759.3|RS27A_YEAST	303308545	186	1.48e-59	RecName: Full=Ubiquitin-40S ribosomal protein S31; Contains: RecName: Full=Ubiquitin; Contains: RecName: Full=40S ribosomal protein S31; AltName: Full=CEP76; AltName: Full=S37; AltName: Full=YS24; Flags: Precursor	Genetic Information Processing	Translation	Ribosome	ko03010	K02977	small subunit ribosomal protein S27Ae	--	KOG0004	J	Ubiquitin/40S ribosomal protein S27a fusion	PF00240.23//PF01599.19	ubiquitin//Ribosomal_S27	GO:0002181//GO:0002109//GO:0000028	cytoplasmic translation//maturation of SSU-rRNA from tricistronic rRNA transcript (SSU-rRNA, LSU-rRNA,5S)//ribosomal small subunit assembly	GO:0031386//GO:0046872//GO:0003735	protein tag//metal ion binding//structural constituent of ribosome	GO:0022627//GO:0005634	cytosolic small ribosomal subunit//nucleus
TRINITY_DN25241_c0_g1	203.868	50.8807	2.0024	1.2993e-08	0.00030745	gi|526192763|gb|EPS35063.1|	526192763	65.9	7.38e-11	hypothetical protein H072_11528 [Dactylellina haptotyla CBS 200.50]	-	-	-	-	-	-	-	-	-	-	-	-	-	-	-	-	-	-	-	-	PF05730.11	CFEM	-	-	-	-	-	-
TRINITY_DN16002_c0_g1	22.712	5.70252	1.9938	0.010452	1	gi|627802121|ref|XP_007674408.1|	627802121	226	4.09e-72	hypothetical protein BAUCODRAFT_32134 [Baudoinia panamericana UAMH 10762]	gi|1607480983|ref|XM_028615849.1|	1607480983	130	1.07e-25	Apiotrichum porosum 60S ribosomal protein L21A (RPL21A), partial mRNA	gi|464626|sp|P34334.3|RL21_CAEEL	464626	153	3.67e-45	RecName: Full=60S ribosomal protein L21	Genetic Information Processing	Translation	Ribosome	ko03010	K02889	large subunit ribosomal protein L21e	--	KOG1732	J	60S ribosomal protein L21	PF01157.18	Ribosomal_L21e	GO:0006412	translation	GO:0003735	structural constituent of ribosome	GO:0005840	ribosome
TRINITY_DN46078_c4_g3	24.6049	6.19064	1.9908	0.015798	1	gi|1000228179|gb|KXJ97179.1|	1000228179	105	2.48e-27	putative 40S ribosomal protein S25 [Microdochium bolleyi]	gi|667826978|ref|XM_007779470.1|	667826978	198	1.72e-46	Coniosporium apollinis CBS 100218 40S ribosomal protein S25 partial mRNA	gi|1173234|sp|P46301.1|RS25_SOLLC	1173234	55.5	3.32e-09	RecName: Full=40S ribosomal protein S25	-	-	-	-	-	-	-	-	-	-	PF03297.15	Ribosomal_S25	--	--	--	--	GO:0005840	ribosome
TRINITY_DN56441_c2_g1	29.8196	7.53987	1.9837	0.0045545	1	gi|526202913|gb|EPS43224.1|	526202913	283	1.94e-94	hypothetical protein H072_2802 [Dactylellina haptotyla CBS 200.50]	gi|628084361|ref|XM_007705841.1|	628084361	481	2.75e-131	Bipolaris sorokiniana ND90Pr hypothetical protein partial mRNA	gi|54039494|sp|Q8T3U2.1|RS23_DROME	54039494	227	9.65e-74	RecName: Full=40S ribosomal protein S23	Genetic Information Processing	Translation	Ribosome	ko03010	K02973	small subunit ribosomal protein S23e	--	KOG1749	J	40S ribosomal protein S23	PF00164.25//PF08720.10	Ribosom_S12_S23//Hema_stalk	GO:0006412//GO:0006364	translation//rRNA processing	GO:0003735	structural constituent of ribosome	GO:0015935//GO:0005732//GO:0034457	small ribosomal subunit//small nucleolar ribonucleoprotein complex//Mpp10 complex
TRINITY_DN59452_c1_g3	18.4703	4.68224	1.9799	0.027699	1	gi|721624748|ref|XP_010229054.1|	721624748	68.2	8.63e-11	calmodulin-binding transcription activator 3 isoform X2 [Brachypodium distachyon]	gi|575878439|gb|KC747118.1|	575878439	65.8	2.01e-06	Hordeum vulgare subsp. vulgare cultivar Bowman synaptonemal complex protein 1 (ZYP1) gene, complete cds	-	-	-	-	-	-	-	-	-	-	-	-	-	-	-	-	-	GO:0045944	positive regulation of transcription by RNA polymerase II	GO:0043565	sequence-specific DNA binding	GO:0001077//GO:0005634	//nucleus
TRINITY_DN15369_c0_g1	22.066	5.6404	1.968	0.01666	1	gi|682320373|gb|KFY23872.1|	682320373	212	1.74e-66	hypothetical protein V493_05582 [Pseudogymnoascus sp. VKM F-4281 (FW-2241)]	gi|5826916|emb|AL112297.1|	5826916	254	4.91e-63	Botrytis cinerea strain T4 cDNA library	gi|74689154|sp|Q6BXZ7.1|PPID_DEBHA	74689154	174	1.51e-51	RecName: Full=Peptidyl-prolyl cis-trans isomerase D; Short=PPIase D; AltName: Full=Rotamase D	-	-	-	-	-	-	-	KOG0865	O	Cyclophilin type peptidyl-prolyl cis-trans isomerase	PF00160.21	Pro_isomerase	GO:0006457//GO:0000413	protein folding//protein peptidyl-prolyl isomerization	GO:0003755	peptidyl-prolyl cis-trans isomerase activity	--	--
TRINITY_DN23976_c0_g1	23.0288	5.93576	1.9559	0.015186	1	gi|667837635|ref|XP_007782986.1|	667837635	308	1.8e-104	40S ribosomal protein S9 [Coniosporium apollinis CBS 100218]	gi|891602345|ref|XM_013170286.1|	891602345	198	2.54e-46	Schizosaccharomyces cryophilus OY26 40S ribosomal protein S9 partial mRNA	gi|75309179|sp|Q9FLF0.1|RS92_ARATH	75309179	241	1.21e-79	RecName: Full=40S ribosomal protein S9-2	Genetic Information Processing	Translation	Ribosome	ko03010	K02997	small subunit ribosomal protein S9e	--	-	-	-	PF00163.19//PF01479.25	Ribosomal_S4//S4	GO:0006412	translation	GO:0003735//GO:0019843	structural constituent of ribosome//rRNA binding	GO:0015935	small ribosomal subunit
TRINITY_DN48377_c3_g3	27.0044	6.98379	1.9511	0.0084334	1	gi|549046941|emb|CCX13721.1|	549046941	293	2.92e-98	Similar to 40S ribosomal protein S7; acc. no. O43105 [Pyronema omphalodes CBS 100304]	gi|1489407203|ref|XM_026754595.1|	1489407203	196	9.93e-46	Aspergillus thermomutatus 40S ribosomal protein S7 (CRP15), partial mRNA	gi|49036475|sp|Q962S0.1|RS7_SPOFR	49036475	170	1.99e-51	RecName: Full=40S ribosomal protein S7 [Spodoptera frugiperda]	Genetic Information Processing	Translation	Ribosome	ko03010	K02993	small subunit ribosomal protein S7e	--	-	-	-	PF01251.18	Ribosomal_S7e	GO:0006412	translation	GO:0003735	structural constituent of ribosome	GO:0005730//GO:0005840//GO:0005829	nucleolus//ribosome//cytosol
TRINITY_DN55981_c3_g6	47.4348	12.3267	1.9442	0.00053425	0.96013	gi|473842295|gb|EMS47309.1|	473842295	55.8	6.78e-06	hypothetical protein TRIUR3_25171 [Triticum urartu]	-	-	-	-	-	-	-	-	-	-	-	-	-	-	-	-	-	-	-	-	PF03469.14	XH	-	-	-	-	-	-
TRINITY_DN39961_c0_g1	18.0451	4.69698	1.9418	0.026165	1	gi|1002876321|ref|XP_015699018.1|	1002876321	324	3.33e-95	PREDICTED: LOW QUALITY PROTEIN: uncharacterized protein LOC102718330 [Oryza brachyantha]	gi|1149808912|ref|XM_020308343.1|	1149808912	1533	0	PREDICTED: Aegilops tauschii subsp. tauschii uncharacterized LOC109749380 (LOC109749380), mRNA	-	-	-	-	-	-	-	-	-	-	-	-	KOG0017	R	FOG: Transposon-encoded proteins with TYA, reverse transcriptase, integrase domains in various combinations	PF03732.17//PF00098.23//PF08284.11	Retrotrans_gag//zf-CCHC//RVP_2	GO:0006259	DNA metabolic process	GO:0003676	nucleic acid binding	--	--
TRINITY_DN45555_c1_g1	35.1385	9.18368	1.9359	0.0032145	1	gi|32489064|emb|CAE03994.1|	32489064	96.3	9.58e-53	OSJNBb0089B03.8 [Oryza sativa Japonica Group]	gi|914342048|gb|KR813335.1|	914342048	241	3.22e-59	Hordeum vulgare subsp. spontaneum voucher OUH602, partial sequence	-	-	-	-	-	-	-	-	-	-	-	-	-	-	-	PF14223.6//PF13917.6	Retrotran_gag_2//zf-CCHC_3	--	--	GO:0005488	binding	GO:0016023
TRINITY_DN36268_c0_g1	15.9118	4.16359	1.9342	0.041816	1	gi|1050180542|gb|OCT45185.1|	1050180542	107	3.72e-28	40S ribosomal protein S29 [Cladophialophora carrionii]	gi|953446510|ref|XM_014711322.1|	953446510	86.1	1.59e-12	Mixia osmundae IAM 14324 hypothetical protein partial mRNA	gi|54039491|sp|Q7XYB0.1|RS29_GRIJA	54039491	89	2.02e-22	RecName: Full=40S ribosomal protein S29	Genetic Information Processing	Translation	Ribosome	ko03010	K02980	small subunit ribosomal protein S29e	--	KOG3506	J	40S ribosomal protein S29	PF00253.21	Ribosomal_S14	GO:0006412	translation	GO:0003735//GO:0003723	structural constituent of ribosome//RNA binding	GO:0015935	small ribosomal subunit
TRINITY_DN38617_c0_g1	16.2416	4.25346	1.933	0.037148	1	gi|682425364|gb|KFY93064.1|	682425364	214	2.52e-66	hypothetical protein V500_03928 [Pseudogymnoascus sp. VKM F-4518 (FW-2643)]	-	-	-	-	-	gi|74681380|sp|Q5BCX8.1|EGLD_EMENI	74681380	87.8	2.1e-18	RecName: Full=Endo-beta-1,4-glucanase D; Short=Endoglucanase D; AltName: Full=Carboxymethylcellulase D; AltName: Full=Cellulase D; Flags: Precursor	-	-	-	-	-	-	-	-	-	-	PF03443.14	Glyco_hydro_61	-	-	-	-	-	-
TRINITY_DN45956_c0_g1	25.4218	6.67264	1.9297	0.011203	1	gi|646290474|gb|KDQ11681.1|	646290474	348	6.02e-115	glycoside hydrolase family 10 protein [Botryobasidium botryosum FD-172 SS1]	gi|299750972|ref|XM_001829906.2|	299750972	67.6	1.19e-06	Coprinopsis cinerea okayama7#130 glycosyl hydrolase family 10 protein (CC1G_04647), partial mRNA	gi|74658366|sp|Q5S7A8.1|XYNA_PENCN	74658366	303	7.44e-100	RecName: Full=Endo-1,4-beta-xylanase A; Short=Xylanase A; AltName: Full=1,4-beta-D-xylan xylanohydrolase A; Flags: Precursor	--	--	--	--	K01181	endo-1,4-beta-xylanase	3.2.1.8	-	-	-	PF00734.18//PF00331.20	CBM_1//Glyco_hydro_10	GO:0000272	polysaccharide catabolic process	GO:0004553	hydrolase activity, hydrolyzing O-glycosyl compounds	--	--
TRINITY_DN9763_c0_g1	26.399	6.94025	1.9274	0.015319	1	gi|1027163237|gb|OAG23607.1|	1027163237	785	0	RCC1/BLIP-II protein [Alternaria alternata]	gi|1343453184|gb|CP022024.1|	1343453184	2041	0	Alternaria solani isolate NL03003 chromosome 1, complete sequence	gi|341941077|sp|Q4U2R1.3|HERC2_MOUSE	341941077	71.6	8.32e-12	RecName: Full=E3 ubiquitin-protein ligase HERC2; AltName: Full=HECT domain and RCC1-like domain-containing protein 2	--	--	--	--	K11493	regulator of chromosome condensation	--	KOG1426	S	FOG: RCC1 domain	PF00415.18	RCC1	-	-	-	-	-	-
TRINITY_DN51834_c3_g1	32.7677	8.61765	1.9269	0.0044522	1	gi|870831152|gb|KMS94246.1|	870831152	237	6.01e-74	hypothetical protein BVRB_023340 [Beta vulgaris subsp. vulgaris]	gi|1098502971|gb|CP011319.1|	1098502971	1133	0	Janthinobacterium sp. 1_2014MBL_MicDiv, complete genome	gi|21263969|sp|Q8XV09.1|RS7_RALSO	21263969	237	2.18e-75	RecName: Full=30S ribosomal protein S7	-	-	-	-	-	-	-	KOG1750	J	Mitochondrial/chloroplast ribosomal protein S12	PF00164.25//PF00177.21//PF00009.27	Ribosom_S12_S23//Ribosomal_S7//GTP_EFTU	GO:0006412	translation	GO:0003735//GO:0019843	structural constituent of ribosome//rRNA binding	GO:0015935//GO:0009507//GO:0005739	small ribosomal subunit//chloroplast//mitochondrion
TRINITY_DN37885_c0_g1	18.8028	4.94985	1.9255	0.024289	1	gi|296416814|ref|XP_002838067.1|	296416814	209	4.73e-67	hypothetical protein [Tuber melanosporum Mel28]	gi|296416813|ref|XM_002838021.1|	296416813	250	6.38e-62	Tuber melanosporum Mel28 hypothetical protein (GSTUM_00000712001) mRNA, complete cds	gi|3024657|sp|P56330.1|SUI1_MAIZE	3024657	113	8.26e-31	RecName: Full=Protein translation factor SUI1 homolog; AltName: Full=Protein GOS2	Genetic Information Processing	Translation	RNA transport	ko03013	K03113	translation initiation factor 1	--	-	-	-	PF01253.22	SUI1	GO:0006413//GO:0015986	translational initiation//ATP synthesis coupled proton transport	GO:0015078//GO:0003743	proton transmembrane transporter activity//translation initiation factor activity	GO:0016021//GO:0045263//GO:0030529//GO:0044444	integral component of membrane//proton-transporting ATP synthase complex, coupling factor F(o)////cytoplasmic part
TRINITY_DN10008_c0_g1	20.4866	5.39826	1.9241	0.017484	1	gi|1002202000|gb|KXS97753.1|	1002202000	171	5.71e-52	hypothetical protein AC578_3202 [Pseudocercospora eumusae]	gi|1590393929|gb|CP034207.1|	1590393929	87.9	4.86e-13	Pyricularia oryzae isolate MZ5-1-6 chromosome 4, complete sequence	gi|442570008|sp|Q757D7.2|RL31_ASHGO	442570008	100	4.81e-26	RecName: Full=60S ribosomal protein L31	Genetic Information Processing	Translation	Ribosome	ko03010	K02910	large subunit ribosomal protein L31e	--	KOG0893	J	60S ribosomal protein L31	PF01198.19	Ribosomal_L31e	GO:0006412	translation	GO:0003735	structural constituent of ribosome	GO:0005840	ribosome
TRINITY_DN44387_c0_g3	33.557	8.84477	1.9237	0.0033455	1	gi|549056235|emb|CCX05047.1|	549056235	233	5.16e-77	Similar to 40S ribosomal protein S12; acc. no. O59936 [Pyronema omphalodes CBS 100304]	gi|1026977775|ref|XM_016740912.1|	1026977775	261	2.13e-65	Penicillium expansum Ribosomal protein L7Ae/L30e/S12e/Gadd45 (PEX2_036370), partial mRNA	gi|18266882|sp|P49196.2|RS12_CAEEL	18266882	141	2.84e-42	RecName: Full=40S ribosomal protein S12	Genetic Information Processing	Translation	Ribosome	ko03010	K02951	small subunit ribosomal protein S12e	--	-	-	-	PF01248.26	Ribosomal_L7Ae	GO:0006629//GO:0006412//GO:0055114	lipid metabolic process//translation//oxidation-reduction process	GO:0003735//GO:0016627	structural constituent of ribosome//oxidoreductase activity, acting on the CH-CH group of donors	GO:0022627//GO:0016021	cytosolic small ribosomal subunit//integral component of membrane
TRINITY_DN45427_c0_g2	87.7982	23.234	1.918	0.019221	1	gi|474186048|gb|EMS57909.1|	474186048	116	9.43e-30	hypothetical protein TRIUR3_11779 [Triticum urartu]	gi|1256609926|ref|XM_004976894.4|	1256609926	124	4.49e-24	PREDICTED: Setaria italica uncharacterized LOC101772092 (LOC101772092), mRNA	-	-	-	-	-	-	-	-	-	-	-	-	-	-	-	PF12609.8	DUF3774	-	-	-	-	-	-
TRINITY_DN62824_c0_g2	23.6376	6.26365	1.916	0.013051	1	gi|694448184|ref|XP_009350051.1|	694448184	288	2.3e-91	PREDICTED: uncharacterized protein LOC103941567 [Pyrus x bretschneideri]	gi|1585087548|gb|CP036401.1|	1585087548	1724	0	Massilia albidiflava strain DSM 17472 chromosome, complete genome	gi|122946539|sp|Q0K625.1|RS3_CUPNH	122946539	365	5.43e-124	RecName: Full=30S ribosomal protein S3	-	-	-	-	-	-	-	-	-	-	PF00237.19//PF03947.18//PF00203.21//PF07650.17//PF00189.20	Ribosomal_L22//Ribosomal_L2_C//Ribosomal_S19//KH_2//Ribosomal_S3_C	--	--	GO:0003676	nucleic acid binding	GO:0043231//GO:0044444//GO:0030529	intracellular membrane-bounded organelle//cytoplasmic part//
TRINITY_DN53606_c0_g2	18.1	4.7968	1.9158	0.033118	1	gi|474238781|gb|EMS59683.1|	474238781	264	1.11e-88	hypothetical protein TRIUR3_05529 [Triticum urartu]	gi|1002867539|ref|XM_006661303.2|	1002867539	100	6.13e-17	PREDICTED: Oryza brachyantha jmjC domain-containing protein 7 (LOC102702595), partial mRNA	-	-	-	-	-	-	-	-	-	-	-	-	-	-	-	PF13499.6	EF-hand_7	--	--	GO:0005509	calcium ion binding	--	--
TRINITY_DN37872_c0_g1	26.7051	7.08946	1.9134	0.0092124	1	gi|549042804|emb|CCX34587.1|	549042804	207	2.74e-66	Similar to 60S ribosomal protein L32; acc. no. Q7RXY1 [Pyronema omphalodes CBS 100304]	gi|5827883|emb|AL113264.1|	5827883	278	2.69e-70	Botrytis cinerea strain T4 cDNA library	gi|51701758|sp|Q6FS03.1|RL32_CANGA	51701758	145	2.99e-43	RecName: Full=60S ribosomal protein L32	-	-	-	-	-	-	-	-	-	-	PF01655.18	Ribosomal_L32e	GO:0006412	translation	GO:0003735	structural constituent of ribosome	GO:0022625	cytosolic large ribosomal subunit
TRINITY_DN37836_c0_g1	42.462	11.3498	1.9035	0.043628	1	gi|1027165220|gb|OAG25588.1|	1027165220	66.2	2.63e-11	hypothetical protein CC77DRAFT_1005174 [Alternaria alternata]	gi|1343453192|gb|CP022032.1|	1343453192	379	6.93e-101	Alternaria solani isolate NL03003 chromosome 9, complete sequence	-	-	-	-	-	-	-	-	-	-	-	-	-	-	-	-	-	-	-	-	-	-	-
TRINITY_DN52674_c3_g1	19.8586	5.33814	1.8954	0.027542	1	gi|937942278|dbj|BAT17190.1|	937942278	57.8	2.67e-08	Os12g0489200, partial [Oryza sativa Japonica Group]	gi|1371087731|ref|XM_010239316.3|	1371087731	119	5.9e-22	PREDICTED: Brachypodium distachyon ubiquitin carboxyl-terminal hydrolase 12 (LOC100831891), transcript variant X1, mRNA	gi|166201361|sp|Q9FPT1.2|UBP12_ARATH	166201361	56.6	7.61e-07	RecName: Full=Ubiquitin carboxyl-terminal hydrolase 12; AltName: Full=Deubiquitinating enzyme 12; Short=AtUBP12; AltName: Full=Ubiquitin thioesterase 12; AltName: Full=Ubiquitin-specific-processing protease 12	-	-	-	-	-	-	-	KOG1863	O	Ubiquitin carboxyl-terminal hydrolase	-	-	-	-	-	-	-	-
TRINITY_DN12394_c0_g1	16.5306	4.49944	1.8773	0.044893	1	gi|944059785|gb|KQJ95375.1|	944059785	68.2	2.44e-10	hypothetical protein BRADI_3g16834v3 [Brachypodium distachyon]	-	-	-	-	-	-	-	-	-	-	-	-	-	-	-	-	-	-	-	-	PF16759.5	LIG3_BRCT	-	-	-	-	-	-
TRINITY_DN29938_c0_g1	17.065	4.65449	1.8743	0.036438	1	gi|296412829|ref|XP_002836122.1|	296412829	194	3.95e-56	hypothetical protein [Tuber melanosporum Mel28]	-	-	-	-	-	-	-	-	-	-	-	-	-	-	-	-	-	-	-	-	PF12505.8	DUF3712	-	-	-	-	-	-
TRINITY_DN55524_c1_g1	29.6266	8.17998	1.8567	0.0070045	1	gi|326507254|dbj|BAJ95704.1|	326507254	470	4.76e-166	predicted protein [Hordeum vulgare subsp. vulgare]	gi|554776491|dbj|AK430242.1|	554776491	905	0	Brachypodium distachyon mRNA, clone: PL016C01-A-038_L24	gi|81905811|sp|Q9D9M5.1|PHOP2_MOUSE	81905811	82.8	3.62e-17	RecName: Full=Pyridoxal phosphate phosphatase PHOSPHO2	Metabolism	Metabolism of cofactors and vitamins	Vitamin B6 metabolism	ko00750	K13248	pyridoxal phosphate phosphatase PHOSPHO2	3.1.3.74	KOG3120	R	Predicted haloacid dehalogenase-like hydrolase	PF06888.12	Put_Phosphatase	GO:0016311	dephosphorylation	GO:0016791	phosphatase activity	--	--
TRINITY_DN44192_c0_g1	32.6397	9.05027	1.8506	0.0058085	1	gi|1029180910|gb|OAL45489.1|	1029180910	224	2.87e-71	hypothetical protein IQ07DRAFT_575967 [Pyrenochaeta sp. DS3sAY3a]	-	-	-	-	-	-	-	-	-	-	-	-	-	-	-	-	-	-	-	-	PF14273.6	DUF4360	-	-	-	-	-	-
TRINITY_DN176369_c0_g1	26.5011	7.36013	1.8482	0.036634	1	gi|452847013|gb|EME48945.1|	452847013	380	3.37e-130	hypothetical protein DOTSEDRAFT_67853 [Dothistroma septosporum NZE10]	gi|1331199529|ref|XM_023611197.1|	1331199529	316	9.72e-82	Rhizopus microsporus ATCC 52813 ribosomal protein S6e (RHIMIDRAFT_255924), mRNA	gi|122001611|sp|Q2PQM1.1|RS6_GLOMM	122001611	311	1.14e-104	RecName: Full=40S ribosomal protein S6 [Glossina morsitans morsitans]	-	-	-	-	-	-	-	-	-	-	PF01092.19	Ribosomal_S6e	GO:0006913//GO:0006412	nucleocytoplasmic transport//translation	GO:0017056//GO:0003735	structural constituent of nuclear pore//structural constituent of ribosome	GO:0005643//GO:0005840	nuclear pore//ribosome
TRINITY_DN60802_c2_g1	28.7899	8.02493	1.843	0.009309	1	gi|631246643|ref|XP_007918243.1|	631246643	476	4.12e-167	putative carrier protein [Phaeoacremonium minimum UCRPA7]	gi|1419009646|ref|XM_025575516.1|	1419009646	839	0	Aspergillus saccharolyticus JOP 1030-1 mitochondrial carrier (BP01DRAFT_358788), mRNA	gi|75219626|sp|O49447.1|ADT3_ARATH	75219626	392	4.4e-134	RecName: Full=ADP,ATP carrier protein 3, mitochondrial; AltName: Full=ADP/ATP translocase 3; AltName: Full=Adenine nucleotide translocator 3; Short=ANT 3; Flags: Precursor	Human Diseases	Infectious diseases: Viral	HTLV-I infection	ko05166	K05863	solute carrier family 25 (mitochondrial adenine nucleotide translocator), member 4/5/6/31	--	-	-	-	PF00153.27	Mito_carr	GO:0055085	transmembrane transport	GO:0005215	transporter activity	GO:0005743//GO:0016021	mitochondrial inner membrane//integral component of membrane
TRINITY_DN4487_c0_g1	36.9237	10.3265	1.8382	0.018121	1	gi|296410982|ref|XP_002835214.1|	296410982	354	4.23e-115	hypothetical protein [Tuber melanosporum Mel28]	-	-	-	-	-	gi|1711500|sp|P08459.2|SPS2_YEAST	1711500	154	1.84e-39	RecName: Full=Sporulation-specific protein 2; Flags: Precursor	-	-	-	-	-	-	-	-	-	-	PF02197.17	RIIa	--	--	--	--	GO:0044464	cell part
TRINITY_DN58507_c2_g1	135.7	38.3372	1.8236	0.00012825	0.40463	gi|429201197|gb|AFZ77240.1|	429201197	125	6.67e-32	salt-induced protein [Leymus chinensis]	-	-	-	-	-	-	-	-	-	-	-	-	-	-	-	-	-	-	-	-	-	-	-	-	-	-	-	-
TRINITY_DN75541_c0_g1	19.4068	5.55637	1.8043	0.04871	1	gi|255676164|dbj|BAF16917.2|	255676164	271	7.61e-82	Os05g0241900 [Oryza sativa Japonica Group]	-	-	-	-	-	-	-	-	-	-	-	-	-	-	-	-	-	-	-	-	PF03732.17//PF08284.11	Retrotrans_gag//RVP_2	GO:0006259	DNA metabolic process	GO:0003676//GO:0003824	nucleic acid binding//catalytic activity	--	--
TRINITY_DN46309_c0_g2	21.2823	6.1155	1.7991	0.036591	1	gi|531984557|gb|EQL35144.1|	531984557	609	0	elongation factor 2 [Blastomyces dermatitidis ATCC 26199]	gi|1419143736|ref|XM_025636541.1|	1419143736	826	0	Aspergillus uvarum CBS 121591 putative translation elongation factor EF-2 subunit (BO82DRAFT_359292), mRNA	gi|51701376|sp|Q875Z2.1|EF2_NAUCC	51701376	511	2.65e-174	RecName: Full=Elongation factor 2; Short=EF-2	Organismal Systems	Endocrine system	Oxytocin signaling pathway	ko04921	K03234	elongation factor 2	--	-	-	-	PF03764.18//PF00679.24	EFG_IV//EFG_C	GO:0006414	translational elongation	GO:0003746//GO:0005525//GO:0003924	translation elongation factor activity//GTP binding//GTPase activity	--	--
TRINITY_DN59715_c1_g2	39.2456	11.3055	1.7955	0.013007	1	gi|573948907|ref|XP_006656754.1|	573948907	102	7.11e-22	PREDICTED: aspartic proteinase nepenthesin-1-like, partial [Oryza brachyantha]	gi|1149721453|ref|XM_020331052.1|	1149721453	191	6.11e-44	PREDICTED: Aegilops tauschii subsp. tauschii 26S proteasome non-ATPase regulatory subunit 1 homolog A-like (LOC109772369), transcript variant X1, mRNA	gi|61214233|sp|Q766C3.1|NEP1_NEPGR	61214233	53.5	1.37e-06	RecName: Full=Aspartic proteinase nepenthesin-1; AltName: Full=Nepenthesin-I; Flags: Precursor	-	-	-	-	-	-	-	KOG2062	O	26S proteasome regulatory complex, subunit RPN2/PSMD1	PF14541.6	TAXi_C	GO:0019538	protein metabolic process	GO:0008233	peptidase activity	--	--
TRINITY_DN57016_c1_g1	45.5039	13.1792	1.7877	0.001577	1	gi|474308824|gb|EMS61849.1|	474308824	57.4	1.28e-06	50S ribosomal protein L24, chloroplastic [Triticum urartu]	gi|151419128|dbj|AK250479.1|	151419128	217	2.07e-51	Hordeum vulgare subsp. vulgare cDNA clone: FLbaf74f05, mRNA sequence	gi|132819|sp|P11893.1|RK24_PEA	132819	50.8	8.41e-06	RecName: Full=50S ribosomal protein L24, chloroplastic; AltName: Full=CL24; Flags: Precursor	Genetic Information Processing	Translation	Ribosome	ko03010	K02895	large subunit ribosomal protein L24	--	KOG1708	J	Mitochondrial/chloroplast ribosomal protein L24	PF17136.4	ribosomal_L24	GO:0006412	translation	--	--	GO:0009507//GO:0005739	chloroplast//mitochondrion
TRINITY_DN62503_c3_g2	22.9345	6.66574	1.7827	0.024236	1	gi|474326909|gb|EMS62504.1|	474326909	125	1.36e-30	Citrate synthase 4, mitochondrial [Triticum urartu]	gi|11066953|gb|AF302906.1|AF302906	11066953	217	5.78e-52	Oryza sativa citrate synthase mRNA, complete cds	gi|122095223|sp|Q17GM7.1|CISY1_AEDAE	122095223	98.6	9.47e-23	RecName: Full=Probable citrate synthase 1, mitochondrial; Flags: Precursor	Metabolism	Global and overview maps	Biosynthesis of amino acids	ko01230	K01647	citrate synthase	2.3.3.1	KOG2617	C	Citrate synthase	PF03154.15//PF13054.6//PF00285.21	Atrophin-1//DUF3915//Citrate_synt	GO:0006099//GO:0006101	tricarboxylic acid cycle//citrate metabolic process	GO:0004108	citrate (Si)-synthase activity	--	--
TRINITY_DN50152_c0_g2	21.9	6.39001	1.777	0.021626	1	gi|1039265426|gb|OBR03702.1|	1039265426	261	1.3e-83	histone H3 [Colletotrichum higginsianum IMI 349063]	gi|67516902|ref|XM_653245.1|	67516902	379	1.1e-100	Aspergillus nidulans FGSC A4 H3_EMENI Histone H3 (AN0733.2), partial mRNA	gi|122065|sp|P09988.2|H31_SCHPO	122065	246	2.8e-81	RecName: Full=Histone H3.1/H3.2	Human Diseases	Immune diseases	Systemic lupus erythematosus	ko05322	K11253	histone H3	--	KOG1745	B	Histones H3 and H4	PF18256.1//PF00125.24	HscB_4_cys//Histone	GO:0006334//GO:0006913	nucleosome assembly//nucleocytoplasmic transport	GO:0017056//GO:0003677//GO:0046982	structural constituent of nuclear pore//DNA binding//protein heterodimerization activity	GO:0005643//GO:0000786	nuclear pore//nucleosome
TRINITY_DN59313_c1_g1	35.1237	10.2664	1.7745	0.0072209	1	gi|743814423|ref|XP_010930029.1|	743814423	154	2.9e-39	PREDICTED: elongator complex protein 3 isoform X2 [Elaeis guineensis]	gi|1205966817|ref|XM_002448032.2|	1205966817	346	1.5e-90	PREDICTED: Sorghum bicolor elongator complex protein 3 (LOC8073682), mRNA	gi|145558900|sp|Q2KJ61.2|ELP3_BOVIN	145558900	127	1.66e-30	RecName: Full=Elongator complex protein 3	--	--	--	--	K07739	elongator complex protein 3	2.3.1.48	KOG2535	BK	RNA polymerase II elongator complex, subunit ELP3/histone acetyltransferase	PF04055.21	Radical_SAM	GO:0006357//GO:0006368//GO:0002098//GO:0016573	regulation of transcription by RNA polymerase II//transcription elongation from RNA polymerase II promoter//tRNA wobble uridine modification//histone acetylation	GO:0051536//GO:0004402	iron-sulfur cluster binding//histone acetyltransferase activity	GO:0033588//GO:0008023//GO:0000123//GO:0005737	Elongator holoenzyme complex//transcription elongation factor complex//histone acetyltransferase complex//cytoplasm
TRINITY_DN44395_c0_g1	30.9425	9.04827	1.7739	0.0085806	1	gi|525581343|gb|EPS27593.1|	525581343	60.8	2.04e-08	hypothetical protein PDE_02536 [Penicillium oxalicum 114-2]	-	-	-	-	-	gi|74671038|sp|Q4WNE1.1|CFMC_ASPFU	74671038	54.3	1.6e-07	RecName: Full=GPI anchored CFEM domain protein C; Flags: Precursor [Aspergillus fumigatus Af293]	-	-	-	-	-	-	-	-	-	-	PF04093.12//PF05730.11	MreD//CFEM	-	-	-	-	-	-
TRINITY_DN42368_c0_g1	304.833	89.389	1.7699	2.61e-07	0.0041172	gi|296414038|ref|XP_002836711.1|	296414038	57	7.06e-07	hypothetical protein [Tuber melanosporum Mel28]	-	-	-	-	-	-	-	-	-	-	-	-	-	-	-	-	-	-	-	-	-	-	-	-	-	-	-	-
TRINITY_DN63037_c1_g2	17.4355	5.13955	1.7623	0.049803	1	gi|125582371|gb|EAZ23302.1|	125582371	38.9	3.88e-21	hypothetical protein OsJ_06998 [Oryza sativa Japonica Group]	gi|1149698793|ref|XM_020294481.1|	1149698793	545	2.1e-150	PREDICTED: Aegilops tauschii subsp. tauschii uncharacterized LOC109735275 (LOC109735275), mRNA	-	-	-	-	-	-	-	-	-	-	-	-	-	-	-	PF03004.14	Transposase_24	--	--	--	--	GO:0005739	mitochondrion
TRINITY_DN65946_c4_g1	119.386	35.2655	1.7593	8.3483e-06	0.059263	gi|326517641|dbj|BAK03739.1|	326517641	302	4.13e-169	predicted protein [Hordeum vulgare subsp. vulgare]	gi|1443059522|ref|XM_015769275.2|	1443059522	460	7.2e-125	PREDICTED: Oryza sativa Japonica Group cinnamoyl-CoA reductase 1-like (LOC4331101), mRNA	gi|1706371|sp|P51105.1|DFRA_GERHY	1706371	58.2	9.85e-08	RecName: Full=Dihydroflavonol-4-reductase; Short=DFR; AltName: Full=Dihydrokaempferol 4-reductase	Metabolism	Biosynthesis of other secondary metabolites	Phenylpropanoid biosynthesis	ko00940	K09753	cinnamoyl-CoA reductase	1.2.1.44	KOG1502	V	Flavonol reductase/cinnamoyl-CoA reductase	PF13460.6//PF01370.21//PF09602.10	NAD_binding_10//Epimerase//PhaP_Bmeg	GO:0055114	oxidation-reduction process	GO:0016621//GO:0050662	cinnamoyl-CoA reductase activity//coenzyme binding	--	--
TRINITY_DN59025_c4_g1	37.187	10.9892	1.7587	0.0031219	1	gi|545705350|ref|XP_005704995.1|	545705350	58.5	7.87e-06	[pt] 50S ribosomal protein L1 [Galdieria sulphuraria]	gi|1272237105|gb|CP024085.1|	1272237105	165	1.41e-35	Pseudomonas putida strain E41 chromosome, complete genome	gi|189041829|sp|B0KK57.1|RL1_PSEPG	189041829	329	2.09e-102	RecName: Full=50S ribosomal protein L1	Genetic Information Processing	Translation	Ribosome	ko03010	K02863	large subunit ribosomal protein L1	--	KOG1569	J	50S ribosomal protein L1	PF03752.13//PF09257.10//PF00584.20//PF02357.19//PF00467.29//PF00466.20//PF16320.5//PF00542.19//PF04563.15//PF03946.14//PF00298.19//PF00687.21//PF03854.14	ALF//BCMA-Tall_bind//SecE//NusG//KOW//Ribosomal_L10//Ribosomal_L12_N//Ribosomal_L12//RNA_pol_Rpb2_1//Ribosomal_L11_N//Ribosomal_L11//Ribosomal_L1//zf-P11	--	--	--	--	GO:0005840	ribosome
TRINITY_DN61842_c3_g1	32.9725	9.74359	1.7587	0.0058217	1	gi|474076747|gb|EMS54566.1|	474076747	83.2	4.71e-15	hypothetical protein TRIUR3_28786 [Triticum urartu]	gi|1149825652|ref|XM_020327205.1|	1149825652	414	3.98e-111	PREDICTED: Aegilops tauschii subsp. tauschii uncharacterized LOC109768477 (LOC109768477), transcript variant X2, mRNA	-	-	-	-	-	-	-	-	-	-	-	-	-	-	-	-	-	-	-	-	-	-	-
TRINITY_DN55162_c2_g4	21.108	6.26165	1.7532	0.029006	1	gi|474073913|gb|EMS54464.1|	474073913	43.1	1.51e-38	hypothetical protein TRIUR3_21051 [Triticum urartu]	gi|1149722905|ref|XM_020331768.1|	1149722905	141	6.44e-29	PREDICTED: Aegilops tauschii subsp. tauschii probable E3 ubiquitin ligase SUD1 (LOC109773067), mRNA	gi|519889692|sp|F4JKK0.1|SUD1_ARATH	519889692	76.3	1.26e-13	RecName: Full=Probable E3 ubiquitin ligase SUD1; AltName: Full=Protein ECERIFERUM 9; AltName: Full=Protein SUPPRESSOR OF DRY2 DEFFECTS 1; Short=AtSUD1; AltName: Full=RING/U-box domain-containing protein	-	-	-	-	-	-	-	KOG1609	A	Protein involved in mRNA turnover and stability	-	-	-	-	-	-	-	-
TRINITY_DN64043_c3_g1	30.8875	9.22801	1.7429	0.034962	1	gi|1002276921|ref|XP_015642799.1|	1002276921	984	0	uncharacterized protein LOC9267181 [Oryza sativa Japonica Group]	gi|1217010940|ref|XM_021789271.1|	1217010940	99	6.91e-16	PREDICTED: Hevea brasiliensis uncharacterized LOC110638655 (LOC110638655), transcript variant X2, mRNA	-	-	-	-	-	-	-	-	-	-	-	-	-	-	-	PF04937.15//PF05699.14	DUF659//Dimer_Tnp_hAT	--	--	GO:0003677//GO:0046983	DNA binding//protein dimerization activity	GO:0009536	plastid
TRINITY_DN35844_c0_g1	16.7019	5.02393	1.7331	0.049819	1	gi|1066294977|ref|XP_018030669.1|	1066294977	105	4.18e-28	ribosomal protein S28e [Paraphaeosphaeria sporulosa]	gi|685407164|ref|XM_009224177.1|	685407164	250	4.14e-62	Gaeumannomyces tritici R3-111a-1 40S ribosomal protein S28 partial mRNA	gi|51316596|sp|Q6FLC3.1|RS28_CANGA	51316596	82.8	1.99e-20	RecName: Full=40S ribosomal protein S28	Genetic Information Processing	Translation	Ribosome	ko03010	K02979	small subunit ribosomal protein S28e	--	-	-	-	PF01200.18	Ribosomal_S28e	GO:0006412	translation	GO:0003735	structural constituent of ribosome	GO:0005840	ribosome
TRINITY_DN49203_c1_g2	17.3295	5.22942	1.7285	0.049863	1	gi|1022625620|ref|XP_016225965.1|	1022625620	191	3.85e-60	40S ribosomal protein S26E [Exophiala mesophila]	gi|212528293|ref|XM_002144268.1|	212528293	327	2.66e-85	Penicillium marneffei ATCC 18224 40S ribosomal protein S26, partial mRNA	gi|133893|sp|P27085.1|RS26_OCTVU	133893	129	7.81e-37	RecName: Full=40S ribosomal protein S26 [Octopus vulgaris]	Genetic Information Processing	Translation	Ribosome	ko03010	K02976	small subunit ribosomal protein S26e	--	-	-	-	PF01283.19	Ribosomal_S26e	GO:0006412	translation	GO:0003729//GO:0003735	mRNA binding//structural constituent of ribosome	GO:0022627	cytosolic small ribosomal subunit
TRINITY_DN47523_c1_g2	26.9101	8.13565	1.7258	0.019487	1	gi|701777354|gb|KGQ11080.1|	701777354	165	1.75e-41	Replicative DNA helicase [Beauveria bassiana D1-5]	gi|1419375412|gb|CP030092.1|	1419375412	534	4.66e-147	Massilia sp. YMA4 chromosome, complete genome	gi|61215454|sp|Q62JQ9.1|RS6_BURMA	61215454	197	8.37e-59	RecName: Full=30S ribosomal protein S6	-	-	-	-	-	-	-	-	-	-	PF01084.20//PF01281.19//PF03948.14//PF01250.17//PF00772.21	Ribosomal_S18//Ribosomal_L9_N//Ribosomal_L9_C//Ribosomal_S6//DnaB	GO:0006260//GO:0044271	DNA replication//cellular nitrogen compound biosynthetic process	GO:0003676//GO:0000166//GO:0004386	nucleic acid binding//nucleotide binding//helicase activity	GO:0032991//GO:0043232	protein-containing complex//intracellular non-membrane-bounded organelle
TRINITY_DN50134_c3_g1	108.753	32.9108	1.7244	0.039533	1	gi|326525287|dbj|BAK07913.1|	326525287	126	5.89e-34	predicted protein [Hordeum vulgare subsp. vulgare]	gi|77817969|gb|DQ245288.1|	77817969	200	7.67e-47	Zea mays clone 14326 mRNA sequence	gi|730165|sp|Q02921.1|NO93_SOYBN	730165	71.2	1.96e-14	RecName: Full=Early nodulin-93; Short=N-93	-	-	-	-	-	-	-	-	-	-	PF03386.14	ENOD93	--	--	--	--	GO:0016021	integral component of membrane
TRINITY_DN34062_c0_g1	18.8191	5.72138	1.7178	0.045029	1	gi|1025681195|gb|OAA68501.1|	1025681195	627	0	inositol-3-phosphate synthase [Sporothrix insectorum RCEF 264]	gi|1248321274|ref|XM_022629414.1|	1248321274	472	2.09e-128	Penicillium arizonense hypothetical protein (PENARI_c004G10716), partial mRNA	gi|14548090|sp|Q38862.2|INO2_ARATH	14548090	489	2.22e-170	RecName: Full=Inositol-3-phosphate synthase isozyme 2; Short=AtIPS2; Short=MIP synthase 2; AltName: Full=Myo-inositol 1-phosphate synthase 2; Short=AtMIPS 2; Short=MI-1-P synthase 2	Metabolism	Carbohydrate metabolism	Inositol phosphate metabolism	ko00562	K01858	myo-inositol-1-phosphate synthase	5.5.1.4	KOG0693	I	Myo-inositol-1-phosphate synthase	PF07994.12//PF01658.17	NAD_binding_5//Inos-1-P_synth	GO:0008654//GO:0006021	phospholipid biosynthetic process//inositol biosynthetic process	GO:0004512	inositol-3-phosphate synthase activity	GO:0005737	cytoplasm
TRINITY_DN59715_c1_g7	23.685	7.22488	1.7129	0.028681	1	gi|573948907|ref|XP_006656754.1|	573948907	112	5.02e-27	PREDICTED: aspartic proteinase nepenthesin-1-like, partial [Oryza brachyantha]	gi|32978069|dbj|AK068051.1|	32978069	126	1.12e-24	Oryza sativa Japonica Group cDNA clone:J013135B02, full insert sequence	-	-	-	-	-	-	-	-	-	-	-	-	-	-	-	PF14541.6	TAXi_C	GO:0016575//GO:0006508	histone deacetylation//proteolysis	GO:0004190//GO:0004407	aspartic-type endopeptidase activity//histone deacetylase activity	--	--
TRINITY_DN152838_c0_g1	27.1921	8.31139	1.71	0.017675	1	gi|296419164|ref|XP_002839189.1|	296419164	55.5	2.82e-06	hypothetical protein [Tuber melanosporum Mel28]	-	-	-	-	-	-	-	-	-	-	-	-	-	-	-	-	-	-	-	-	-	-	-	-	-	-	-	-
TRINITY_DN45473_c0_g1	45.7951	14.0259	1.7071	0.0028967	1	gi|296421084|ref|XP_002840096.1|	296421084	339	1.51e-104	hypothetical protein [Tuber melanosporum Mel28]	-	-	-	-	-	gi|1723783|sp|P53334.1|SCW4_YEAST	1723783	127	1.82e-30	RecName: Full=Probable family 17 glucosidase SCW4; AltName: Full=Soluble cell wall protein 4; Flags: Precursor	-	-	-	-	-	-	-	-	-	-	-	-	-	-	-	-	-	-
TRINITY_DN56700_c5_g2	18.6612	5.74501	1.6997	0.039727	1	gi|473860187|gb|EMS47493.1|	473860187	72	5.52e-12	Ribonucleases P/MRP protein subunit POP1 [Triticum urartu]	gi|1149738954|ref|XR_002236825.1|	1149738954	124	3.46e-24	PREDICTED: Aegilops tauschii subsp. tauschii uncharacterized LOC109779291 (LOC109779291), transcript variant X2, ncRNA	-	-	-	-	-	-	-	-	-	-	-	-	-	-	-	-	-	GO:0090502//GO:0001682	RNA phosphodiester bond hydrolysis, endonucleolytic//tRNA 5'-leader removal	GO:0000171//GO:0004526	ribonuclease MRP activity//ribonuclease P activity	GO:0000172//GO:0005655	ribonuclease MRP complex//nucleolar ribonuclease P complex
TRINITY_DN55488_c0_g4	21.802	6.73398	1.6949	0.039256	1	gi|669028684|emb|CDM82578.1|	669028684	162	5.06e-38	unnamed protein product [Triticum aestivum]	gi|1358102399|gb|AC276604.1|	1358102399	115	9.22e-21	Brachypodium distachyon clone FGYW241-B16, complete sequence	-	-	-	-	-	-	-	-	-	-	-	-	-	-	-	PF02902.19	Peptidase_C48	-	-	-	-	-	-
TRINITY_DN170505_c0_g1	22.5547	7.03318	1.6812	0.031862	1	gi|46395793|sp|Q86ZU6.1|GLNA_TUBBO	46395793	597	0	RecName: Full=Glutamine synthetase; Short=GS; AltName: Full=Glutamate--ammonia ligase	gi|1418961154|ref|XM_025535222.1|	1418961154	518	3.27e-142	Aspergillus eucalypticola CBS 122712 glutamine synthetase (BO83DRAFT_425683), partial mRNA	gi|2494743|sp|Q12613.1|GLNA_COLGL	2494743	504	4.85e-177	RecName: Full=Glutamine synthetase; Short=GS; AltName: Full=Glutamate--ammonia ligase	Organismal Systems	Nervous system	GABAergic synapse	ko04727	K01915	glutamine synthetase	6.3.1.2	KOG0683	E	Glutamine synthetase	PF03951.19//PF00120.24	Gln-synt_N//Gln-synt_C	GO:0019676//GO:0006542//GO:0006995	ammonia assimilation cycle//glutamine biosynthetic process//cellular response to nitrogen starvation	GO:0005524//GO:0004356	ATP binding//glutamate-ammonia ligase activity	GO:0005829//GO:0005634	cytosol//nucleus
TRINITY_DN39703_c0_g1	33.6533	10.5814	1.6692	0.01711	1	gi|682295817|gb|KFY09962.1|	682295817	267	1.07e-87	hypothetical protein V491_07869 [Pseudogymnoascus sp. VKM F-3775]	-	-	-	-	-	gi|2494341|sp|Q00023.1|CEL1_AGABI	2494341	97.8	2.33e-22	RecName: Full=Cellulose-growth-specific protein; Flags: Precursor	-	-	-	-	-	-	-	-	-	-	PF03443.14	Glyco_hydro_61	-	-	-	-	-	-
TRINITY_DN38498_c0_g1	30.9572	9.78514	1.6616	0.018496	1	gi|296420790|ref|XP_002839951.1|	296420790	289	8.58e-84	hypothetical protein [Tuber melanosporum Mel28]	-	-	-	-	-	gi|189037687|sp|A7F9L8.1|PRM1_SCLS1	189037687	229	6.4e-63	RecName: Full=Plasma membrane fusion protein prm1	-	-	-	-	-	-	-	-	-	-	-	-	-	-	-	-	-	-
TRINITY_DN66202_c1_g2	20.9568	6.64105	1.6579	0.042732	1	gi|944083362|gb|KQK18714.1|	944083362	76.3	1.02e-14	hypothetical protein BRADI_1g44245v3 [Brachypodium distachyon]	gi|1149845723|ref|XR_002232997.1|	1149845723	320	3.4e-83	PREDICTED: Aegilops tauschii subsp. tauschii uncharacterized LOC109763797 (LOC109763797), transcript variant X1, ncRNA	-	-	-	-	-	-	-	-	-	-	-	-	-	-	-	-	-	GO:0008152	metabolic process	GO:0003824	catalytic activity	--	--
TRINITY_DN55830_c0_g2	24.9024	7.934	1.6502	0.0232	1	gi|326531272|dbj|BAK04987.1|	326531272	70.1	9.18e-35	predicted protein [Hordeum vulgare subsp. vulgare]	gi|1371044756|ref|XM_010238619.3|	1371044756	211	5.41e-50	PREDICTED: Brachypodium distachyon kinesin-like protein KIN-4C (LOC100828670), transcript variant X2, mRNA	gi|75299353|sp|Q8GS71.1|FRA1_ARATH	75299353	58.9	5.54e-08	RecName: Full=Kinesin-like protein FRA1; AltName: Full=Protein FRAGILE FIBER 1	-	-	-	-	-	-	-	KOG0244	Z	Kinesin-like protein	-	-	GO:0007018//GO:0071555	microtubule-based movement//cell wall organization	GO:0008017//GO:0005524//GO:0003777	microtubule binding//ATP binding//microtubule motor activity	GO:0009506//GO:0005874	plasmodesma//microtubule
TRINITY_DN60472_c3_g2	21.224	6.77141	1.6482	0.038775	1	gi|960450443|ref|XP_014753620.1|	960450443	71.2	2.08e-30	putative protein FAR1-RELATED SEQUENCE 10 [Brachypodium distachyon]	-	-	-	-	-	gi|334302810|sp|Q9SZL7.2|FRS9_ARATH	334302810	32.3	5.09e-06	RecName: Full=Protein FAR1-RELATED SEQUENCE 9	-	-	-	-	-	-	-	-	-	-	PF10551.9	MULE	GO:0006355	regulation of transcription, DNA-templated	--	--	--	--
TRINITY_DN59780_c0_g1	29.504	9.52337	1.6314	0.015546	1	gi|474429041|gb|EMS67856.1|	474429041	95.5	1.53e-19	Haloacid dehalogenase-like hydrolase domain-containing protein 3 [Triticum urartu]	gi|1205986331|ref|XM_002438764.2|	1205986331	134	1.21e-26	PREDICTED: Sorghum bicolor haloacid dehalogenase-like hydrolase domain-containing protein 3 (LOC8061583), transcript variant X1, mRNA	-	-	-	-	-	-	-	-	-	-	-	-	KOG3085	R	Predicted hydrolase (HAD superfamily)	-	-	GO:0008152	metabolic process	GO:0016787	hydrolase activity	--	--
TRINITY_DN40316_c0_g1	115.291	37.4144	1.6236	7.8667e-05	0.27922	gi|1029187290|gb|OAL51854.1|	1029187290	366	3.13e-126	hypothetical protein IQ07DRAFT_536482 [Pyrenochaeta sp. DS3sAY3a]	-	-	-	-	-	-	-	-	-	-	-	-	-	-	-	-	-	-	-	-	PF14273.6	DUF4360	-	-	-	-	-	-
TRINITY_DN49188_c2_g2	24.915	8.14945	1.6122	0.033067	1	gi|473759429|gb|EMS45792.1|	473759429	126	8.17e-28	RNA polymerase II C-terminal domain phosphatase-like 1 [Triticum urartu]	gi|326499497|dbj|AK354841.1|	326499497	134	1.48e-26	Hordeum vulgare subsp. vulgare mRNA for predicted protein, complete cds, clone: NIASHv1011O24	-	-	-	-	-	-	-	-	-	-	-	-	-	-	-	-	-	GO:0009611//GO:0009651//GO:0045892//GO:0070940//GO:0009738	response to wounding//response to salt stress//negative regulation of transcription, DNA-templated//dephosphorylation of RNA polymerase II C-terminal domain//abscisic acid-activated signaling pathway	GO:0004647//GO:0008420	phosphoserine phosphatase activity//RNA polymerase II CTD heptapeptide repeat phosphatase activity	GO:0016591	RNA polymerase II, holoenzyme
TRINITY_DN52862_c4_g2	44.2303	14.5059	1.6084	0.0050591	1	gi|194695808|gb|ACF81988.1|	194695808	62	2.28e-08	unknown [Zea mays]	gi|1149828115|ref|XR_002231391.1|	1149828115	207	1.16e-48	PREDICTED: Aegilops tauschii subsp. tauschii uncharacterized LOC109756944 (LOC109756944), transcript variant X3, ncRNA	-	-	-	-	-	-	-	-	-	-	-	-	-	-	-	-	-	-	-	-	-	-	-
TRINITY_DN61478_c0_g1	25.0212	8.22046	1.6059	0.025508	1	gi|473905114|gb|EMS49360.1|	473905114	64.3	6.26e-08	hypothetical protein TRIUR3_28042 [Triticum urartu]	gi|1282797651|gb|MG560141.1|	1282797651	206	3.8e-48	Triticum aestivum gamma gliadin-B1, gamma gliadin-B2, delta gliadin-B1, gamma gliadin-B4, gamma gliadin-B6, omega gliadin-B3, omega gliadin-B6, LMW-B2, and LMW-B3 genes, complete cds	-	-	-	-	-	-	-	-	-	-	-	-	-	-	-	PF04009.12	DUF356	-	-	-	-	-	-
TRINITY_DN11619_c0_g1	24.5145	8.06541	1.6038	0.030486	1	gi|662532348|gb|KEQ89720.1|	662532348	187	1.09e-57	hypothetical protein M438DRAFT_341451 [Aureobasidium pullulans EXF-150]	gi|146324607|ref|XM_741625.2|	146324607	228	3.09e-55	Aspergillus fumigatus Af293 37S ribosomal protein S24 (AFUA_7G02140), partial mRNA	gi|74876324|sp|Q75K27.1|RS24_DICDI	74876324	104	3.31e-27	RecName: Full=40S ribosomal protein S24	-	-	-	-	-	-	-	KOG3424	J	40S ribosomal protein S24	PF01282.19	Ribosomal_S24e	GO:0006412	translation	GO:0003735//GO:0000166	structural constituent of ribosome//nucleotide binding	GO:0005840	ribosome
TRINITY_DN50619_c5_g3	20.386	6.73782	1.5972	0.047279	1	gi|472243979|gb|EMR88617.1|	472243979	129	3.25e-36	putative 60s acidic ribosomal protein p1 protein [Botrytis cinerea BcDW1]	gi|119496416|ref|XM_001264981.1|	119496416	228	2.29e-55	Aspergillus fischeri NRRL 181 60S acidic ribosomal protein P1 partial mRNA	gi|6094105|sp|O01359.1|RLA1_OSCTI	6094105	72	2.03e-15	RecName: Full=60S acidic ribosomal protein P1; AltName: Full=Ribosomal protein RPL-21 [Oscheius tipulae]	-	-	-	-	-	-	-	-	-	-	PF00428.19	Ribosomal_60s	GO:0032147//GO:0002181//GO:0006414	activation of protein kinase activity//cytoplasmic translation//translational elongation	GO:0003735//GO:0030295//GO:0070180	structural constituent of ribosome//protein kinase activator activity//large ribosomal subunit rRNA binding	GO:0030687//GO:0022625	preribosome, large subunit precursor//cytosolic large ribosomal subunit
TRINITY_DN65509_c7_g1	30.0825	9.98374	1.5913	0.018318	1	gi|21741977|emb|CAD41785.1|	21741977	80.1	6.08e-13	OSJNBa0035M09.1 [Oryza sativa Japonica Group]	gi|300681569|emb|FN564436.1|	300681569	169	4.39e-37	Triticum aestivum chromosome 3B-specific BAC library, contig ctg1035b	-	-	-	-	-	-	-	-	-	-	-	-	-	-	-	-	-	--	--	GO:0005488	binding	GO:0005739	mitochondrion
TRINITY_DN39326_c0_g1	24.8089	8.26095	1.5865	0.027632	1	gi|1003742499|gb|KXX78313.1|	1003742499	341	4.57e-113	Extracellular exo-alpha-(1->5)-L-arabinofuranosidase [Madurella mycetomatis]	-	-	-	-	-	gi|1170139|sp|P46239.1|GUNF_FUSOX	1170139	56.2	2.12e-07	RecName: Full=Putative endoglucanase type F; AltName: Full=Cellulase; AltName: Full=Endo-1,4-beta-glucanase; Flags: Precursor	-	-	-	-	-	-	-	-	-	-	PF00734.18//PF04616.14	CBM_1//Glyco_hydro_43	--	--	GO:0016787	hydrolase activity	--	--
TRINITY_DN156054_c0_g1	24.4823	8.15328	1.5863	0.030387	1	gi|1027161057|gb|OAG21431.1|	1027161057	355	2.68e-123	hypothetical protein CC77DRAFT_933679 [Alternaria alternata]	gi|1360907633|gb|AC277087.1|	1360907633	172	1.49e-38	Bipolaris maydis clone FNFP201-I05, complete sequence	-	-	-	-	-	-	-	-	-	-	-	-	-	-	-	PF14273.6	DUF4360	-	-	-	-	-	-
TRINITY_DN140753_c0_g1	25.4435	8.55937	1.5717	0.032581	1	gi|549046775|emb|CCX32543.1|	549046775	251	3.16e-81	Similar to 60S ribosomal protein L18-B; acc. no. Q8TFH1 [Pyronema omphalodes CBS 100304]	gi|1249071334|ref|XM_022721470.1|	1249071334	141	5.22e-29	Penicilliopsis zonata CBS 506.65 hypothetical protein (ASPZODRAFT_126297), mRNA	gi|75163854|sp|Q940B0.1|RL183_ARATH	75163854	179	1.68e-54	RecName: Full=60S ribosomal protein L18-3	Genetic Information Processing	Translation	Ribosome	ko03010	K02883	large subunit ribosomal protein L18e	--	KOG1714	J	60s ribosomal protein L18	PF17135.4	Ribosomal_L18	GO:0055085//GO:0006412	transmembrane transport//translation	GO:0003735	structural constituent of ribosome	GO:0005840//GO:0016021	ribosome//integral component of membrane
TRINITY_DN27546_c0_g1	20.9905	7.13884	1.556	0.049749	1	gi|1027165155|gb|OAG25523.1|	1027165155	648	0	hypothetical protein CC77DRAFT_1028041 [Alternaria alternata]	gi|169597232|ref|XM_001791988.1|	169597232	231	5.95e-56	Parastagonospora nodorum SN15 hypothetical protein (SNOG_01400), partial mRNA	-	-	-	-	-	-	-	-	-	-	-	-	-	-	-	-	-	--	--	--	--	GO:0016020	membrane
TRINITY_DN47349_c0_g1	20.9562	7.22182	1.5369	0.049609	1	gi|474063556|gb|EMS54061.1|	474063556	79.3	3.27e-15	hypothetical protein TRIUR3_21283 [Triticum urartu]	gi|326499409|dbj|AK354797.1|	326499409	267	1.01e-66	Hordeum vulgare subsp. vulgare mRNA for predicted protein, partial cds, clone: NIASHv1011F07	-	-	-	-	-	-	-	-	-	-	-	-	-	-	-	-	-	-	-	-	-	-	-
TRINITY_DN51949_c2_g1	39.6175	13.6604	1.5361	0.010718	1	gi|300681521|emb|CBH32616.1|	300681521	363	1.21e-120	glutathione S-transferase, putative, expressed [Triticum aestivum]	gi|32974638|dbj|AK064620.1|	32974638	374	8.72e-99	Oryza sativa Japonica Group cDNA clone:002-113-D07, full insert sequence	gi|1170781|sp|P46417.1|GSTX3_SOYBN	1170781	132	2.48e-34	RecName: Full=Glutathione S-transferase 3	Human Diseases	Cancers: Overview	Chemical carcinogenesis	ko05204	K00799	glutathione S-transferase	2.5.1.18	KOG0406	O	Glutathione S-transferase	PF13417.6//PF13410.6	GST_N_3//GST_C_2	GO:0009407//GO:0006749	toxin catabolic process//glutathione metabolic process	GO:0004364	glutathione transferase activity	GO:0005737	cytoplasm
TRINITY_DN61328_c2_g2	21.4695	7.42731	1.5314	0.049366	1	gi|573921181|ref|XP_006648183.1|	573921181	66.2	1.19e-09	PREDICTED: protein ELC-like [Oryza brachyantha]	-	-	-	-	-	-	-	-	-	-	-	-	-	-	-	-	-	-	-	-	PF12266.8//PF09454.10	DUF3613//Vps23_core	GO:0015031//GO:0006464	protein transport//cellular protein modification process	--	--	--	--
TRINITY_DN42279_c0_g1	50.8419	17.6046	1.5301	0.017451	1	gi|549045642|emb|CCX33368.1|	549045642	348	4.54e-113	Similar to Protein TOS1; acc. no. P38288 [Pyronema omphalodes CBS 100304]	-	-	-	-	-	gi|74588753|sp|Q59L72.1|PGA52_CANAL	74588753	66.2	2.39e-10	RecName: Full=GPI-anchored protein 52; Flags: Precursor	-	-	-	-	-	-	-	-	-	-	PF10290.9//PF10287.9	DUF2403//DUF2401	-	-	-	-	-	-
TRINITY_DN52721_c0_g1	24.5329	8.49725	1.5297	0.049236	1	gi|960457474|ref|XP_014752557.1|	960457474	229	3.06e-65	uncharacterized protein LOC100845247 isoform X1 [Brachypodium distachyon]	gi|1149813380|ref|XM_020310140.1|	1149813380	784	0	PREDICTED: Aegilops tauschii subsp. tauschii uncharacterized LOC109751239 (LOC109751239), transcript variant X9, mRNA	gi|374095453|sp|O65278.2|ULP1B_ARATH	374095453	56.2	4.12e-07	RecName: Full=Putative ubiquitin-like-specific protease 1B	-	-	-	-	-	-	-	-	-	-	PF02902.19//PF01131.20	Peptidase_C48//Topoisom_bac	-	-	-	-	-	-
TRINITY_DN47103_c5_g1	21.4184	7.4342	1.5266	0.049489	1	gi|474242005|gb|EMS59866.1|	474242005	469	4.69e-152	Putative disease resistance protein RGA3 [Triticum urartu]	gi|1371063060|ref|XM_014899075.2|	1371063060	438	1.82e-118	PREDICTED: Brachypodium distachyon putative disease resistance protein RGA3 (LOC100836329), transcript variant X3, mRNA	gi|46396003|sp|Q9LRR5.1|DRL21_ARATH	46396003	60.1	1.44e-08	RecName: Full=Putative disease resistance protein At3g14460	-	-	-	-	-	-	-	-	-	-	-	-	--	--	GO:0043531	ADP binding	--	--
TRINITY_DN13737_c0_g1	20.5699	7.16937	1.5206	0.045531	1	gi|51090465|dbj|BAD35435.1|	51090465	979	0	putative S-receptor kinase [Oryza sativa Japonica Group]	gi|932283019|gb|CP012614.1|	932283019	363	3.22e-95	Oryza sativa Indica Group cultivar RP Bio-226 chromosome 6 sequence	gi|317373528|sp|Q9LK03.3|PERK2_ARATH	317373528	214	2.01e-57	RecName: Full=Proline-rich receptor-like protein kinase PERK2; AltName: Full=Proline-rich extensin-like receptor kinase 2; Short=AtPERK2; AltName: Full=Somatic embryogenesis receptor kinase-like protein	-	-	-	-	-	-	-	-	-	-	PF01453.24//PF08276.11//PF00069.25	B_lectin//PAN_2//Pkinase	GO:0006468	protein phosphorylation	GO:0004674//GO:0000166	protein serine/threonine kinase activity//nucleotide binding	GO:0005886//GO:0016023	plasma membrane//
TRINITY_DN47058_c2_g3	25.7086	8.98003	1.5175	0.029325	1	gi|367032276|ref|XP_003665421.1|	367032276	182	2.76e-54	histone H2B-like protein [Thermothelomyces thermophilus ATCC 42464]	gi|1344051295|ref|XM_024053105.1|	1344051295	411	4.1e-110	PREDICTED: Quercus suber histone H2B-like (LOC112020547), mRNA	gi|122046|sp|P23754.2|H2B_EMENI	122046	177	8.72e-54	RecName: Full=Histone H2B	Human Diseases	Immune diseases	Systemic lupus erythematosus	ko05322	K11252	histone H2B	--	KOG1744	B	Histone H2B	PF00125.24	Histone	--	--	GO:0046982//GO:0003677	protein heterodimerization activity//DNA binding	GO:0000786//GO:0005634	nucleosome//nucleus
TRINITY_DN56349_c0_g1	28.5058	9.99569	1.5119	0.032336	1	gi|944081603|gb|KQK16955.1|	944081603	196	3.01e-177	hypothetical protein BRADI_1g31617v3 [Brachypodium distachyon]	gi|1443085488|ref|XM_026026226.1|	1443085488	909	0	PREDICTED: Oryza sativa Japonica Group putative clathrin assembly protein At5g57200 (LOC9266390), transcript variant X1, mRNA	gi|2492687|sp|Q61548.1|AP180_MOUSE	2492687	68.2	1.39e-10	RecName: Full=Clathrin coat assembly protein AP180; AltName: Full=91 kDa synaptosomal-associated protein; AltName: Full=Clathrin coat-associated protein AP180; AltName: Full=Phosphoprotein F1-20	-	-	-	-	-	-	-	KOG0251	TU	Clathrin assembly protein AP180 and related proteins, contain ENTH domain	PF07651.16	ANTH	GO:0048268	clathrin coat assembly	GO:0005545//GO:0030276	1-phosphatidylinositol binding//clathrin binding	GO:0030136	clathrin-coated vesicle
TRINITY_DN60256_c1_g2	24.1509	8.4715	1.5114	0.045822	1	gi|222628744|gb|EEE60876.1|	222628744	399	3.86e-129	hypothetical protein OsJ_14536 [Oryza sativa Japonica Group]	gi|57834147|emb|AL663016.5|	57834147	150	2.08e-31	Oryza sativa genomic DNA, chromosome 4, BAC clone: OSJNBb0076A22, complete sequence	gi|45477070|sp|P92555.1|M1250_ARATH	45477070	59.3	2.38e-09	RecName: Full=Uncharacterized mitochondrial protein AtMg01250; AltName: Full=ORF102	-	-	-	-	-	-	-	KOG1075	R	FOG: Reverse transcriptase	PF00078.27//PF13966.6//PF13456.6	RVT_1//zf-RVT//RVT_3	GO:0009987	cellular process	GO:0016788	hydrolase activity, acting on ester bonds	GO:0016023//GO:0071944//GO:0016020	//cell periphery//membrane
TRINITY_DN59361_c4_g2	29.4534	10.4588	1.4937	0.024881	1	gi|1002252108|ref|XP_015630298.1|	1002252108	40.4	1.25e-11	mitochondrial substrate carrier family protein E [Oryza sativa Japonica Group]	gi|1371063716|ref|XM_010233569.3|	1371063716	132	2.38e-26	PREDICTED: Brachypodium distachyon methionine S-methyltransferase (LOC100836641), transcript variant X2, mRNA	gi|50401195|sp|Q9SWR3.1|MMT1_WEDBI	50401195	56.6	6.74e-08	RecName: Full=Methionine S-methyltransferase; AltName: Full=AdoMet:Met S-methyltransferase [Wedelia biflora]	-	-	-	-	-	-	-	-	-	-	-	-	-	-	-	-	-	-
TRINITY_DN52898_c0_g3	199.233	70.7745	1.4932	0.01069	1	gi|429201197|gb|AFZ77240.1|	429201197	63.5	4.71e-09	salt-induced protein [Leymus chinensis]	-	-	-	-	-	-	-	-	-	-	-	-	-	-	-	-	-	-	-	-	-	-	-	-	-	-	-	-
TRINITY_DN53294_c1_g1	30.8995	11.006	1.4893	0.019168	1	gi|357150574|ref|XP_003575505.1|	357150574	209	0	importin subunit beta-1 [Brachypodium distachyon]	gi|1443081007|ref|XM_015783793.2|	1443081007	553	1.04e-152	PREDICTED: Oryza sativa Japonica Group importin subunit beta-1 (LOC4338508), transcript variant X3, mRNA	gi|3183036|sp|Q06142.1|IMB1_YEAST	3183036	73.2	3.17e-12	RecName: Full=Importin subunit beta-1; AltName: Full=Importin-95; AltName: Full=Karyopherin subunit beta-1; AltName: Full=Karyopherin-95	Genetic Information Processing	Translation	RNA transport	ko03013	K14293	importin subunit beta-1	--	KOG1241	YU	Karyopherin (importin) beta 1	PF07502.14//PF13513.6	MANEC//HEAT_EZ	GO:0006607//GO:0000060//GO:0006610//GO:0000059	NLS-bearing protein import into nucleus//obsolete protein import into nucleus, translocation//ribosomal protein import into nucleus//obsolete protein import into nucleus, docking	GO:0008565//GO:0008536//GO:0008139	obsolete protein transporter activity//Ran GTPase binding//nuclear localization sequence binding	GO:0031965//GO:0034399//GO:0005737	nuclear membrane//nuclear periphery//cytoplasm
TRINITY_DN51570_c0_g1	24.3763	8.75184	1.4778	0.035285	1	gi|296414404|ref|XP_002836891.1|	296414404	342	1.82e-117	60S ribosomal protein L15 [Tuber melanosporum Mel28]	gi|5826377|emb|AL111758.1|	5826377	507	4.1e-139	Botrytis cinerea strain T4 cDNA library	gi|47606012|sp|Q7T2N4.3|RL15_SILME	47606012	254	3.82e-84	RecName: Full=60S ribosomal protein L15	Genetic Information Processing	Translation	Ribosome	ko03010	K02877	large subunit ribosomal protein L15e	--	KOG1678	J	60s ribosomal protein L15	PF00827.17	Ribosomal_L15e	GO:0006412	translation	GO:0015078//GO:0003735	proton transmembrane transporter activity//structural constituent of ribosome	GO:0016021//GO:0005840//GO:0033179//GO:0015991	integral component of membrane//ribosome//proton-transporting V-type ATPase, V0 domain//
TRINITY_DN54300_c2_g1	40.6837	14.6353	1.475	0.04483	1	gi|669030840|emb|CDM85526.1|	669030840	530	0	unnamed protein product [Triticum aestivum]	gi|326500533|dbj|AK375161.1|	326500533	139	2.31e-28	Hordeum vulgare subsp. vulgare mRNA for predicted protein, complete cds, clone: NIASHv3086L20	-	-	-	-	-	-	-	-	-	-	-	-	-	-	-	-	-	-	-	-	-	-	-
TRINITY_DN40423_c0_g1	42.9704	15.5628	1.4652	0.029588	1	gi|1027161229|gb|OAG21603.1|	1027161229	764	0	Di-copper centre-containing protein [Alternaria alternata]	gi|627853366|ref|XM_007691328.1|	627853366	231	3.98e-56	Bipolaris oryzae ATCC 44560 hypothetical protein partial mRNA	gi|1717839|sp|P55022.2|TYRO_STRGB	1717839	51.2	5.42e-06	RecName: Full=Tyrosinase; AltName: Full=Monophenol monooxygenase	-	-	-	-	-	-	-	-	-	-	PF00264.20	Tyrosinase	GO:0055114	oxidation-reduction process	GO:0046872//GO:0016491	metal ion binding//oxidoreductase activity	--	--
TRINITY_DN39204_c0_g1	25.5996	9.28045	1.4639	0.043216	1	gi|326502660|dbj|BAJ98958.1|	326502660	961	0	predicted protein [Hordeum vulgare subsp. vulgare]	gi|1002820969|gb|KT203455.1|	1002820969	857	0	Paspalum vaginatum clone SpCT3 hypothetical protein mRNA, complete cds	gi|75277931|sp|O48786.1|C734A_ARATH	75277931	417	4.56e-139	RecName: Full=Cytochrome P450 734A1; AltName: Full=Protein PHYB ACTIVATION-TAGGED SUPPRESSOR 1	-	-	-	-	-	-	-	KOG0157	QI	Cytochrome P450 CYP4/CYP19/CYP26 subfamilies	PF00067.22	p450	GO:0022900	electron transport chain	GO:0020037//GO:0016705//GO:0004497//GO:0005506	heme binding//oxidoreductase activity, acting on paired donors, with incorporation or reduction of molecular oxygen//monooxygenase activity//iron ion binding	GO:0016021	integral component of membrane
TRINITY_DN44651_c0_g1	61.2251	22.3029	1.4569	0.0045498	1	gi|1027163470|gb|OAG23840.1|	1027163470	392	6.62e-132	hypothetical protein CC77DRAFT_628634 [Alternaria alternata]	gi|189194156|ref|XM_001933382.1|	189194156	195	6.57e-45	Pyrenophora tritici-repentis Pt-1C-BFP conserved hypothetical protein, mRNA	-	-	-	-	-	-	-	-	-	-	-	-	-	-	-	-	-	-	-	-	-	-	-
TRINITY_DN51343_c4_g1	42.2036	15.3743	1.4568	0.029186	1	gi|296033914|gb|ADG84875.1|	296033914	63.2	6.03e-08	Tsn1 [Aegilops speltoides]	-	-	-	-	-	-	-	-	-	-	-	-	-	-	-	-	-	-	-	-	PF13855.6	LRR_8	GO:0006468	protein phosphorylation	GO:0043531//GO:0004672//GO:0005524	ADP binding//protein kinase activity//ATP binding	--	--
TRINITY_DN35330_c0_g1	27.6504	10.0963	1.4535	0.032626	1	gi|1063246697|gb|ODQ69223.1|	1063246697	82.4	4.15e-15	hypothetical protein LIPSTDRAFT_66404 [Lipomyces starkeyi NRRL Y-11557]	-	-	-	-	-	-	-	-	-	-	-	-	-	-	-	-	-	-	-	-	PF10342.9	GPI-anchored	-	-	-	-	-	-
TRINITY_DN61968_c1_g4	25.881	9.50757	1.4447	0.039476	1	gi|222612582|gb|EEE50714.1|	222612582	409	5.92e-137	hypothetical protein OsJ_30995 [Oryza sativa Japonica Group]	-	-	-	-	-	gi|125987635|sp|P0C2F6.1|RNHX1_ARATH	125987635	131	1.62e-31	RecName: Full=Putative ribonuclease H protein At1g65750	-	-	-	-	-	-	-	KOG1075	R	FOG: Reverse transcriptase	PF13966.6	zf-RVT	-	-	-	-	-	-
TRINITY_DN50378_c0_g1	102.786	37.9592	1.4371	0.00035053	0.75404	gi|670021172|emb|CDJ26290.1|	670021172	200	5.22e-50	unnamed protein product [Triticum aestivum]	gi|1149742539|ref|XR_002237093.1|	1149742539	230	3.56e-55	PREDICTED: Aegilops tauschii subsp. tauschii uncharacterized LOC109780636 (LOC109780636), ncRNA	-	-	-	-	-	-	-	-	-	-	-	-	-	-	-	PF17333.2//PF02902.19	DEFB136//Peptidase_C48	-	-	-	-	-	-
TRINITY_DN53208_c2_g1	26.9332	9.96104	1.435	0.03867	1	gi|474045400|gb|EMS53444.1|	474045400	85.5	9.7e-16	hypothetical protein TRIUR3_08227 [Triticum urartu]	-	-	-	-	-	-	-	-	-	-	-	-	-	-	-	-	-	-	-	-	PF08788.11	NHR2	-	-	-	-	-	-
TRINITY_DN48335_c6_g1	40.9254	15.3199	1.4176	0.019782	1	gi|474204206|gb|EMS58604.1|	474204206	26.2	1.05e-14	Protein WAX2 [Triticum urartu]	gi|1149814399|ref|XM_020310588.1|	1149814399	69.4	3.36e-07	PREDICTED: Aegilops tauschii subsp. tauschii uncharacterized LOC109751704 (LOC109751704), transcript variant X1, mRNA	-	-	-	-	-	-	-	-	-	-	-	-	-	-	-	PF12076.8	Wax2_C	GO:0008152	metabolic process	--	--	--	--
TRINITY_DN50399_c0_g1	31.6325	11.8516	1.4163	0.025134	1	gi|960476148|ref|XP_003572088.3|	960476148	55.8	9.64e-06	palmitoyl-protein thioesterase 1 [Brachypodium distachyon]	gi|1371074499|ref|XM_003572040.4|	1371074499	106	3.08e-18	PREDICTED: Brachypodium distachyon palmitoyl-protein thioesterase 1 (LOC100834215), mRNA	-	-	-	-	-	-	-	-	-	-	-	-	-	-	-	-	-	-	-	-	-	-	-
TRINITY_DN49329_c0_g1	26.5977	9.97378	1.4151	0.038293	1	gi|1012366981|gb|KYP78162.1|	1012366981	260	2.26e-77	GTPase obg, partial [Cajanus cajan]	gi|1585087548|gb|CP036401.1|	1585087548	750	0	Massilia albidiflava strain DSM 17472 chromosome, complete genome	gi|261266705|sp|B2JHD7.1|OBG_BURP8	261266705	429	2.74e-143	RecName: Full=GTPase Obg; AltName: Full=GTP-binding protein Obg	-	-	-	-	-	-	-	KOG1489	R	Predicted GTP-binding protein (ODN superfamily)	PF00829.21//PF01018.22//PF01926.23//PF01016.19	Ribosomal_L21p//GTP1_OBG//MMR_HSR1//Ribosomal_L27	--	--	GO:0005488	binding	--	--
TRINITY_DN59371_c3_g2	64.9466	24.5499	1.4035	0.0035232	1	gi|514731029|ref|XP_004957083.1|	514731029	73.6	2.34e-11	putative clathrin assembly protein At4g40080 [Setaria italica]	gi|1149812292|ref|XR_002229978.1|	1149812292	141	1.01e-28	PREDICTED: Aegilops tauschii subsp. tauschii uncharacterized LOC109750718 (LOC109750718), transcript variant X14, ncRNA	-	-	-	-	-	-	-	-	-	-	-	-	-	-	-	-	-	-	-	-	-	-	-
TRINITY_DN44185_c0_g1	32.9744	12.538	1.395	0.022397	1	gi|223525720|gb|EEF28187.1|	223525720	118	2.6e-33	cold shock domain containing proteins, putative [Ricinus communis]	gi|1575585379|gb|CP035913.1|	1575585379	359	5.68e-95	Massilia lutea strain DSM 17473 chromosome	gi|22256741|sp|Q9S170.1|CSPG_SHEVD	22256741	87.8	1.37e-22	RecName: Full=Cold shock-like protein CspG	-	-	-	-	-	-	-	KOG3070	J	Predicted RNA-binding protein containing PIN domain and invovled in translation or RNA processing	PF00313.22	CSD	GO:0006355	regulation of transcription, DNA-templated	GO:0003677	DNA binding	--	--
TRINITY_DN241548_c0_g1	43.1794	16.4262	1.3943	0.013591	1	gi|116194011|ref|XP_001222818.1|	116194011	352	2.84e-120	hypothetical protein CHGG_06723 [Chaetomium globosum CBS 148.51]	gi|685404229|ref|XM_009222710.1|	685404229	472	1.81e-128	Gaeumannomyces tritici R3-111a-1 hypothetical protein partial mRNA	-	-	-	-	-	-	-	-	-	-	-	-	-	-	-	PF14273.6	DUF4360	-	-	-	-	-	-
TRINITY_DN50669_c1_g3	67.9705	26.0701	1.3825	0.0072921	1	gi|474446112|gb|EMS68625.1|	474446112	281	0	hypothetical protein TRIUR3_26594 [Triticum urartu]	gi|1149778084|ref|XM_020296764.1|	1149778084	213	3.5e-50	PREDICTED: Aegilops tauschii subsp. tauschii uncharacterized LOC109737639 (LOC109737639), transcript variant X1, mRNA	-	-	-	-	-	-	-	-	-	-	-	-	-	-	-	-	-	-	-	-	-	-	-
TRINITY_DN58156_c1_g1	47.434	18.2902	1.3748	0.010961	1	gi|1002840347|ref|XP_015688260.1|	1002840347	77	3.59e-14	PREDICTED: uncharacterized protein LOC102703823 [Oryza brachyantha]	gi|116637521|emb|CT834853.1|	116637521	143	1.99e-29	Oryza sativa (indica cultivar-group) cDNA clone:OSIGCPI020H16, full insert sequence	-	-	-	-	-	-	-	-	-	-	-	-	-	-	-	PF14108.6	DUF4281	--	--	--	--	GO:0016021//GO:0031969	integral component of membrane//chloroplast membrane
TRINITY_DN47439_c0_g1	97.2719	37.6236	1.3704	0.0010294	1	gi|189208528|ref|XP_001940597.1|	189208528	320	1.53e-108	hypothetical protein PTRG_10265 [Pyrenophora tritici-repentis Pt-1C-BFP]	gi|636587938|ref|XM_008027117.1|	636587938	265	2.63e-66	Setosphaeria turcica Et28A hypothetical protein partial mRNA	-	-	-	-	-	-	-	-	-	-	-	-	-	-	-	PF14273.6	DUF4360	-	-	-	-	-	-
TRINITY_DN55209_c2_g1	26.9482	10.4558	1.3659	0.040303	1	gi|473909557|gb|EMS49484.1|	473909557	69.7	3.06e-11	hypothetical protein TRIUR3_03894 [Triticum urartu]	gi|151418854|dbj|AK250205.1|	151418854	117	1.9e-21	Hordeum vulgare subsp. vulgare cDNA clone: FLbaf64n02, mRNA sequence	-	-	-	-	-	-	-	-	-	-	-	-	-	-	-	PF01283.19	Ribosomal_S26e	-	-	-	-	-	-
TRINITY_DN50426_c3_g2	30.3742	11.8585	1.3569	0.034054	1	gi|721651767|ref|XP_010233661.1|	721651767	685	0	putative disease resistance RPP13-like protein 3 [Brachypodium distachyon]	gi|1371072828|ref|XM_024460588.1|	1371072828	171	1.47e-37	PREDICTED: Brachypodium distachyon putative late blight resistance protein homolog R1A-3 (LOC112271466), mRNA	gi|117949826|sp|Q6L406.2|R1B19_SOLDE	117949826	121	4.87e-27	RecName: Full=Putative late blight resistance protein homolog R1B-19 [Solanum demissum]	-	-	-	-	-	-	-	KOG4658	T	Apoptotic ATPase	PF00931.22//PF12799.7	NB-ARC//LRR_4	--	--	GO:0097159//GO:1901363	organic cyclic compound binding//heterocyclic compound binding	--	--
TRINITY_DN49926_c0_g1	30.3008	11.9079	1.3474	0.034088	1	gi|669027096|emb|CDM80304.1|	669027096	298	9.86e-87	unnamed protein product [Triticum aestivum]	gi|1149756749|ref|XM_020344562.1|	1149756749	257	1.41e-63	PREDICTED: Aegilops tauschii subsp. tauschii G-type lectin S-receptor-like serine/threonine-protein kinase SD1-1 (LOC109785975), transcript variant X4, mRNA	gi|152013446|sp|O65479.2|CRK20_ARATH	152013446	114	9.61e-25	RecName: Full=Putative cysteine-rich receptor-like protein kinase 20; Short=Cysteine-rich RLK20; Flags: Precursor	-	-	-	-	-	-	-	-	-	-	PF18278.1//PF00069.25//PF11883.8//PF01657.17	RANK_CRD_2//Pkinase//DUF3403//Stress-antifung	GO:0006468	protein phosphorylation	GO:0004672//GO:0005524	protein kinase activity//ATP binding	GO:0016021	integral component of membrane
TRINITY_DN60321_c1_g2	34.4354	13.5675	1.3437	0.028323	1	gi|474253241|gb|EMS60271.1|	474253241	107	1.46e-21	hypothetical protein TRIUR3_34891 [Triticum urartu]	gi|1205965173|ref|XM_021463166.1|	1205965173	178	1.25e-39	PREDICTED: Sorghum bicolor OTU domain-containing protein 5 (LOC110436338), mRNA	-	-	-	-	-	-	-	-	-	-	-	-	KOG2605	TO	OTU (ovarian tumor)-like cysteine protease	PF18715.1	Phage_spike	GO:0016578	histone deubiquitination	GO:0042393//GO:0004843//GO:0031491	histone binding//thiol-dependent ubiquitin-specific protease activity//nucleosome binding	GO:0009536//GO:0005739	plastid//mitochondrion
TRINITY_DN65595_c0_g2	101.131	39.86	1.3432	0.012265	1	gi|326503610|dbj|BAJ86311.1|	326503610	32.7	4.92e-07	predicted protein [Hordeum vulgare subsp. vulgare]	gi|119388718|gb|EF122845.1|	119388718	102	2.36e-17	Triticum aestivum alcohol dehydrogenase ADH2B mRNA, complete cds	gi|113365|sp|P14673.1|ADH1_SOLTU	113365	231	1.44e-72	RecName: Full=Alcohol dehydrogenase 1	Metabolism	Lipid metabolism	alpha-Linolenic acid metabolism	ko00592	K18857	alcohol dehydrogenase class-P	1.1.1.1	KOG0022	Q	Alcohol dehydrogenase, class III	PF00107.26	ADH_zinc_N	GO:0055114	oxidation-reduction process	GO:0008270//GO:0016491	zinc ion binding//oxidoreductase activity	--	--
TRINITY_DN58843_c3_g4	29.6542	11.7213	1.3391	0.039924	1	gi|326533466|dbj|BAK05264.1|	326533466	294	2.12e-92	predicted protein [Hordeum vulgare subsp. vulgare]	gi|1149759558|ref|XR_002238470.1|	1149759558	206	2.31e-48	PREDICTED: Aegilops tauschii subsp. tauschii uncharacterized LOC109787044 (LOC109787044), transcript variant X2, ncRNA	gi|75186401|sp|Q9M8J3.1|FRS7_ARATH	75186401	59.7	2.81e-08	RecName: Full=Protein FAR1-RELATED SEQUENCE 7	-	-	-	-	-	-	-	-	-	-	-	-	--	--	GO:0005488	binding	--	--
TRINITY_DN53268_c0_g1	31.554	12.4986	1.3361	0.034869	1	gi|473961269|gb|EMS51104.1|	473961269	758	0	Cysteine-rich receptor-like protein kinase 15 [Triticum urartu]	gi|296837128|gb|GU259640.1|	296837128	73.1	2.99e-08	Triticum aestivum cultivar Shagke Huomai Tsn1 (Tsn1) gene, complete cds	gi|75326703|sp|Q7F8Q9.1|MSL1_ORYSJ	75326703	72	6.48e-12	RecName: Full=Leucine-rich repeat receptor protein kinase MSL1; AltName: Full=MSP1 protein homolog 1; AltName: Full=MSP1-like protein 1; Flags: Precursor	-	-	-	-	-	-	-	-	-	-	PF15116.6//PF13855.6//PF12799.7	CD52//LRR_8//LRR_4	GO:0006468	protein phosphorylation	GO:0043531//GO:0004672//GO:0005524	ADP binding//protein kinase activity//ATP binding	--	--
TRINITY_DN59615_c0_g1	41.3722	16.432	1.3322	0.016883	1	gi|473877768|gb|EMS47888.1|	473877768	55.1	1.15e-17	Cytosolic Fe-S cluster assembly factor NUBP1-like protein [Triticum urartu]	-	-	-	-	-	-	-	-	-	-	-	-	-	-	-	-	-	-	-	-	-	-	-	-	-	-	-	-
TRINITY_DN53830_c0_g1	44.6684	17.7636	1.3303	0.014524	1	gi|474433631|gb|EMS68076.1|	474433631	115	5.46e-27	hypothetical protein TRIUR3_20152 [Triticum urartu]	-	-	-	-	-	-	-	-	-	-	-	-	-	-	-	-	-	-	-	-	PF01753.18	zf-MYND	GO:0045490	pectin catabolic process	GO:0046872//GO:0030570	metal ion binding//pectate lyase activity	--	--
TRINITY_DN58280_c0_g2	42.2188	16.8351	1.3264	0.01643	1	gi|937899495|dbj|BAS75475.1|	937899495	197	6.6e-61	Os01g0873000 [Oryza sativa Japonica Group]	gi|1371092696|ref|XR_002960473.1|	1371092696	401	1.85e-107	PREDICTED: Brachypodium distachyon uncharacterized LOC100825447 (LOC100825447), ncRNA	-	-	-	-	-	-	-	-	-	-	-	-	-	-	-	PF14303.6	NAM-associated	GO:0006749	glutathione metabolic process	GO:0004364	glutathione transferase activity	GO:0005840	ribosome
TRINITY_DN65700_c1_g2	52.6257	21.0178	1.3242	0.014441	1	gi|474261030|gb|EMS60528.1|	474261030	181	4.12e-46	hypothetical protein TRIUR3_29466 [Triticum urartu]	gi|1149794165|ref|XR_002228105.1|	1149794165	532	1.95e-146	PREDICTED: Aegilops tauschii subsp. tauschii uncharacterized LOC109743572 (LOC109743572), transcript variant X21, misc_RNA	-	-	-	-	-	-	-	-	-	-	-	-	-	-	-	-	-	-	-	-	-	-	-
TRINITY_DN58557_c3_g2	40.8549	16.4213	1.3149	0.023117	1	gi|326531128|dbj|BAK04915.1|	326531128	150	7.81e-46	predicted protein [Hordeum vulgare subsp. vulgare]	gi|326519780|dbj|AK369061.1|	326519780	102	1.12e-17	Hordeum vulgare subsp. vulgare mRNA for predicted protein, complete cds, clone: NIASHv2084K09	-	-	-	-	-	-	-	-	-	-	-	-	-	-	-	-	-	-	-	-	-	-	-
TRINITY_DN63793_c3_g2	35.5102	14.412	1.301	0.028827	1	gi|473759967|gb|EMS45818.1|	473759967	335	7.53e-109	ABC transporter A family member 7 [Triticum urartu]	gi|1256588072|ref|XM_004973313.3|	1256588072	575	5.78e-160	PREDICTED: Setaria italica ABC transporter A family member 7 (LOC101777348), mRNA	gi|75333985|sp|Q9FKF2.1|AB11A_ARATH	75333985	172	2.34e-49	RecName: Full=ABC transporter A family member 11; Short=ABC transporter ABCA.11; Short=AtABCA11; AltName: Full=Putative ABC2 homolog 15	-	-	-	-	-	-	-	KOG0059	IR	Lipid exporter ABCA1 and related proteins, ABC superfamily	PF13304.6	AAA_21	GO:0055085//GO:0006869	transmembrane transport//lipid transport	GO:0042626//GO:0005524	ATPase-coupled transmembrane transporter activity//ATP binding	GO:0043231//GO:0016021	intracellular membrane-bounded organelle//integral component of membrane
TRINITY_DN50170_c1_g2	46.2935	18.8552	1.2958	0.016573	1	gi|326528197|dbj|BAJ89150.1|	326528197	280	4.25e-93	predicted protein [Hordeum vulgare subsp. vulgare]	gi|195624189|gb|EU961807.1|	195624189	477	3.57e-130	Zea mays clone 238346 nudix hydrolase 4 mRNA, complete cds	gi|68565871|sp|Q52K88.1|NUD13_ARATH	68565871	94.7	7.38e-22	RecName: Full=Nudix hydrolase 13, mitochondrial; Short=AtNUDT13; Flags: Precursor	--	--	--	--	K07766	diphosphoinositol-polyphosphate diphosphatase	3.6.1.52	KOG2839	T	Diadenosine and diphosphoinositol polyphosphate phosphohydrolase	PF00293.28	NUDIX	--	--	GO:0016787	hydrolase activity	--	--
TRINITY_DN61448_c1_g2	65.3021	26.7083	1.2898	0.0073077	1	gi|359491066|ref|XP_002279926.2|	359491066	30.4	9.15e-34	PREDICTED: uncharacterized protein LOC100266414 isoform X1 [Vitis vinifera]	gi|1091683683|ref|XM_009392731.2|	1091683683	191	4.55e-44	PREDICTED: Musa acuminata subsp. malaccensis uncharacterized LOC103977266 (LOC103977266), mRNA	gi|60390225|sp|Q9WV86.1|KTNA1_MOUSE	60390225	64.7	1.53e-10	RecName: Full=Katanin p60 ATPase-containing subunit A1; Short=Katanin p60 subunit A1; AltName: Full=Lipotransin; AltName: Full=p60 katanin	-	-	-	-	-	-	-	KOG0737	O	AAA+-type ATPase	PF00004.29//PF17862.1	AAA//AAA_lid_3	-	-	-	-	-	-
TRINITY_DN54465_c1_g1	62.5228	25.606	1.2879	0.0086063	1	gi|474305981|gb|EMS61785.1|	474305981	77.8	1.01e-11	Putative disease resistance protein RGA4 [Triticum urartu]	gi|1149721990|ref|XM_020331320.1|	1149721990	209	4.51e-49	PREDICTED: Aegilops tauschii subsp. tauschii disease resistance protein RGA2-like (LOC109772623), transcript variant X16, mRNA	-	-	-	-	-	-	-	-	-	-	-	-	-	-	-	PF02892.15//PF18052.1	zf-BED//Rx_N	-	-	-	-	-	-
TRINITY_DN61359_c0_g1	46.9973	19.28	1.2855	0.01727	1	gi|944081726|gb|KQK17078.1|	944081726	388	1.06e-131	hypothetical protein BRADI_1g32350v3 [Brachypodium distachyon]	gi|1205990226|ref|XR_002448923.1|	1205990226	628	5.35e-176	PREDICTED: Sorghum bicolor molybdenum cofactor sulfurase (LOC8061592), transcript variant X4, misc_RNA	gi|226707511|sp|B4PYH5.1|MOCOS_DROYA	226707511	158	6.17e-44	RecName: Full=Molybdenum cofactor sulfurase; Short=MCS; Short=MOS; Short=MoCo sulfurase; AltName: Full=Molybdenum cofactor sulfurtransferase; AltName: Full=Protein maroon-like; Short=Ma-l	--	--	--	--	K15631	molybdenum cofactor sulfurtransferase	2.8.1.9	KOG2142	H	Molybdenum cofactor sulfurase	PF03476.16	MOSC_N	GO:0010118//GO:0006777//GO:0009651//GO:0042742//GO:0009409//GO:0009734//GO:0009408//GO:0018315//GO:0009688//GO:0045037	stomatal movement//Mo-molybdopterin cofactor biosynthetic process//response to salt stress//defense response to bacterium//response to cold//auxin-activated signaling pathway//response to heat//molybdenum incorporation into molybdenum-molybdopterin complex//abscisic acid biosynthetic process//protein import into chloroplast stroma	GO:0008265//GO:0016740//GO:0009000//GO:0030170//GO:0030151	Mo-molybdopterin cofactor sulfurase activity//transferase activity//selenocysteine lyase activity//pyridoxal phosphate binding//molybdenum ion binding	GO:0005622	intracellular
TRINITY_DN63860_c0_g4	45.7746	18.7791	1.2854	0.016881	1	gi|670369207|ref|XP_008665780.1|	670369207	41.6	7.53e-15	myosin-6 isoform X2 [Zea mays]	gi|1314996594|ref|XM_008667557.3|	1314996594	128	8.9e-25	PREDICTED: Zea mays myosin-6 (LOC103644344), transcript variant X1, mRNA	gi|519882227|sp|F4I5Q6.1|MYO7_ARATH	519882227	53.9	4.53e-06	RecName: Full=Myosin-7; AltName: Full=Myosin XI A; Short=AtXIA	-	-	-	-	-	-	-	KOG0160	Z	Myosin class V heavy chain	PF00063.21//PF14291.6	Myosin_head//DUF4371	--	--	GO:0003779//GO:0005524//GO:0003774	actin binding//ATP binding//motor activity	GO:0016459	myosin complex
TRINITY_DN45491_c0_g1	88.6227	36.6254	1.2748	0.017163	1	gi|721693912|ref|XP_010240307.1|	721693912	67.8	7.39e-12	uncharacterized protein LOC100845464 [Brachypodium distachyon]	gi|1149801413|ref|XM_020305455.1|	1149801413	444	4.76e-120	PREDICTED: Aegilops tauschii subsp. tauschii uncharacterized LOC109746339 (LOC109746339), mRNA	-	-	-	-	-	-	-	-	-	-	-	-	-	-	-	-	-	-	-	-	-	-	-
TRINITY_DN64367_c2_g1	34.6932	14.3459	1.274	0.040095	1	gi|357144704|ref|XP_003573386.1|	357144704	222	6.92e-65	glycerate dehydrogenase [Brachypodium distachyon]	gi|241984748|dbj|AK332008.1|	241984748	429	1.58e-115	Triticum aestivum cDNA, clone: WT002_O16, cultivar: Chinese Spring	gi|205780035|sp|A4W577.1|GHRB_ENT38	205780035	55.5	3.91e-07	RecName: Full=Glyoxylate/hydroxypyruvate reductase B	-	-	-	-	-	-	-	KOG0069	C	Glyoxylate/hydroxypyruvate reductase (D-isomer-specific 2-hydroxy acid dehydrogenase superfamily)	PF14074.6//PF02826.19	DUF4257//2-Hacid_dh_C	GO:0055114	oxidation-reduction process	GO:0016618//GO:0051287//GO:0030267	hydroxypyruvate reductase activity//NAD binding//glyoxylate reductase (NADP) activity	GO:0005829	cytosol
TRINITY_DN60587_c0_g1	59.4993	24.6278	1.2726	0.0085601	1	gi|326521062|dbj|BAJ96734.1|	326521062	155	8.75e-38	predicted protein [Hordeum vulgare subsp. vulgare]	gi|1256612167|ref|XM_004976698.4|	1256612167	69.4	1.19e-06	PREDICTED: Setaria italica probable protein phosphatase 2C 44 (LOC101763327), mRNA	gi|75163673|sp|Q93YW5.1|P2C58_ARATH	75163673	30.4	3.07e-06	RecName: Full=Probable protein phosphatase 2C 58; Short=AtPP2C58	-	-	-	-	-	-	-	KOG1075	R	FOG: Reverse transcriptase	PF13966.6	zf-RVT	GO:0044238//GO:0044260//GO:0006913	primary metabolic process//cellular macromolecule metabolic process//nucleocytoplasmic transport	GO:0016787	hydrolase activity	GO:0005634	nucleus
TRINITY_DN56317_c1_g1	34.5723	14.3143	1.2722	0.049588	1	gi|474077455|gb|EMS54598.1|	474077455	66.2	1.16e-08	Transposon Ty3-G Gag-Pol polyprotein [Triticum urartu]	gi|1443066085|ref|XM_015776153.2|	1443066085	102	3.67e-17	PREDICTED: Oryza sativa Japonica Group uncharacterized LOC4332351 (LOC4332351), mRNA	-	-	-	-	-	-	-	-	-	-	-	-	-	-	-	-	-	--	--	GO:0008270//GO:0003676	zinc ion binding//nucleic acid binding	--	--
TRINITY_DN44469_c0_g1	34.6437	14.3498	1.2716	0.035466	1	gi|573961500|ref|XP_006662913.1|	573961500	501	1.64e-167	PREDICTED: subtilisin-like protease SBT3.9 [Oryza brachyantha]	gi|326496660|dbj|AK367154.1|	326496660	1447	0	Hordeum vulgare subsp. vulgare mRNA for predicted protein, partial cds, clone: NIASHv2052D13	gi|71153422|sp|Q9LLL8.1|SBT4E_ARATH	71153422	172	8.43e-45	RecName: Full=Subtilisin-like protease SBT4.14; AltName: Full=Cucumisin-like protein; AltName: Full=Subtilase subfamily 4 member 14; Short=AtSBT4.14; AltName: Full=Xylem serine proteinase 1; Short=AtXSP1; Flags: Precursor	-	-	-	-	-	-	-	-	-	-	PF00082.22//PF17766.1	Peptidase_S8//fn3_6	GO:0006508	proteolysis	GO:0004252	serine-type endopeptidase activity	GO:0005618//GO:0016023	cell wall//
TRINITY_DN50117_c0_g1	37.7122	15.6508	1.2688	0.032159	1	gi|669028983|emb|CDM82989.1|	669028983	523	0	unnamed protein product [Triticum aestivum]	gi|226493660|ref|NM_001152535.1|	226493660	457	7.88e-124	Zea mays uncharacterized LOC100279537 (LOC100279537), mRNA	gi|75299660|sp|Q8GZM7.1|PIF1_ARATH	75299660	53.5	2.83e-06	RecName: Full=Transcription factor PIF1; AltName: Full=Basic helix-loop-helix protein 15; Short=AtbHLH15; Short=bHLH 15; AltName: Full=Protein PHY-INTERACTING FACTOR 1; AltName: Full=Protein PHYTOCHROME INTERACTING FACTOR 3-LIKE 5; AltName: Full=Transcription factor EN 101; AltName: Full=bHLH transcription factor bHLH015	-	-	-	-	-	-	-	-	-	-	PF00010.26	HLH	--	--	GO:0046983	protein dimerization activity	GO:0005634	nucleus
TRINITY_DN52738_c1_g6	71.8871	29.9928	1.2611	0.0067901	1	gi|473781826|gb|EMS46107.1|	473781826	62.8	2.37e-09	hypothetical protein TRIUR3_21507 [Triticum urartu]	gi|1149796223|ref|XR_002228277.1|	1149796223	86.1	6.68e-12	PREDICTED: Aegilops tauschii subsp. tauschii uncharacterized LOC109744339 (LOC109744339), transcript variant X1, ncRNA	-	-	-	-	-	-	-	-	-	-	-	-	-	-	-	-	-	-	-	-	-	-	-
TRINITY_DN52884_c1_g1	36.0451	15.0385	1.2611	0.042857	1	gi|18642688|gb|AAK02026.2|AC074283_7	18642688	62.4	4.11e-09	Unknown protein [Oryza sativa]	-	-	-	-	-	-	-	-	-	-	-	-	-	-	-	-	-	-	-	-	-	-	-	-	-	-	-	-
TRINITY_DN54602_c2_g1	42.4372	17.7222	1.2598	0.024532	1	gi|721628925|ref|XP_010229880.1|	721628925	90.5	1.13e-18	RING-H2 finger protein ATL39 [Brachypodium distachyon]	gi|1149775774|ref|XM_020296013.1|	1149775774	656	0	PREDICTED: Aegilops tauschii subsp. tauschii putative RING-H2 finger protein ATL19 (LOC109736802), mRNA	gi|68565111|sp|Q5EAE9.2|ATL43_ARATH	68565111	56.2	5.48e-07	RecName: Full=RING-H2 finger protein ATL43; Flags: Precursor	-	-	-	-	-	-	-	KOG0800	O	FOG: Predicted E3 ubiquitin ligase	PF13639.6	zf-RING_2	--	--	GO:0046872	metal ion binding	GO:0016020//GO:0016023	membrane//
TRINITY_DN47036_c1_g1	38.271	15.9905	1.259	0.029538	1	gi|193848602|gb|ACF22786.1|	193848602	65.9	3.61e-08	MDR-like ABC transporter [Brachypodium distachyon]	gi|937928473|dbj|AP014964.1|	937928473	287	1.74e-72	Oryza sativa Japonica Group DNA, chromosome 8, cultivar: Nipponbare, complete sequence	gi|75333473|sp|Q9C7F8.1|AB13B_ARATH	75333473	86.7	4.94e-16	RecName: Full=ABC transporter B family member 13; Short=ABC transporter ABCB.13; Short=AtABCB13; AltName: Full=P-glycoprotein 13; AltName: Full=Putative multidrug resistance protein 15	-	-	-	-	-	-	-	KOG0055	Q	Multidrug/pheromone exporter, ABC superfamily	PF00005.27//PF00664.23	ABC_tran//ABC_membrane	GO:0055085	transmembrane transport	GO:0042626	ATPase-coupled transmembrane transporter activity	GO:0016021	integral component of membrane
TRINITY_DN36638_c0_g1	55.3174	23.1827	1.2547	0.042777	1	gi|125551368|gb|EAY97077.1|	125551368	93.6	1.03e-17	hypothetical protein OsI_18998 [Oryza sativa Indica Group]	gi|299109310|emb|FN564426.1|	299109310	137	1.42e-27	Triticum aestivum chromosome 3B-specific BAC library, contig ctg0005b	-	-	-	-	-	-	-	-	-	-	-	-	-	-	-	PF16166.5	TIC20	-	-	-	-	-	-
TRINITY_DN47855_c0_g2	31.554	13.2355	1.2534	0.044339	1	gi|50401177|sp|Q9MBC2.1|MMT1_HORVU	50401177	65.1	1.46e-08	RecName: Full=Methionine S-methyltransferase; AltName: Full=AdoMet:Met S-methyltransferase; AltName: Full=Hv-MMT1	gi|1435168391|ref|XM_025965021.1|	1435168391	78.7	5.05e-10	PREDICTED: Panicum hallii uncharacterized LOC112896898 (LOC112896898), mRNA	gi|50401093|sp|Q8W519.2|MMT1_MAIZE	50401093	57.8	9.84e-08	RecName: Full=Methionine S-methyltransferase; AltName: Full=AdoMet:Met S-methyltransferase	-	-	-	-	-	-	-	-	-	-	-	-	--	--	GO:0003824	catalytic activity	--	--
TRINITY_DN43431_c0_g1	31.486	13.2108	1.253	0.044486	1	gi|326490143|dbj|BAJ94145.1|	326490143	533	0	predicted protein [Hordeum vulgare subsp. vulgare]	gi|326503931|dbj|AK371554.1|	326503931	516	9.33e-142	Hordeum vulgare subsp. vulgare mRNA for predicted protein, partial cds, clone: NIASHv2137B01	gi|5915837|sp|O81974.1|C71D8_SOYBN	5915837	284	2.65e-90	RecName: Full=Cytochrome P450 71D8; AltName: Full=Cytochrome P450 CP7	-	-	-	-	-	-	-	KOG0156	Q	Cytochrome P450 CYP2 subfamily	PF00067.22	p450	GO:0044550	secondary metabolite biosynthetic process	GO:0016709//GO:0046872	oxidoreductase activity, acting on paired donors, with incorporation or reduction of molecular oxygen, NAD(P)H as one donor, and incorporation of one atom of oxygen//metal ion binding	GO:0016020	membrane
TRINITY_DN50568_c0_g1	378.661	159.977	1.243	0.0022458	1	gi|4100157|gb|AAD10337.1|	4100157	135	1.43e-31	cysteine proteinase precursor [Hordeum vulgare]	gi|1149736746|ref|XM_020337029.1|	1149736746	100	2.92e-16	PREDICTED: Aegilops tauschii subsp. tauschii zingipain-2-like (LOC109778465), transcript variant X9, mRNA	gi|71153408|sp|O65493.1|XCP1_ARATH	71153408	113	8.2e-26	RecName: Full=Xylem cysteine proteinase 1; Short=AtXCP1; Flags: Precursor	-	-	-	-	-	-	-	KOG1543	O	Cysteine proteinase Cathepsin L	PF00112.23	Peptidase_C1	-	-	-	-	-	-
TRINITY_DN62408_c0_g4	35.8052	15.1322	1.2425	0.03827	1	gi|721611745|ref|XP_010237812.1|	721611745	73.2	5.63e-12	rab3 GTPase-activating protein catalytic subunit isoform X1 [Brachypodium distachyon]	gi|1189419122|gb|CP018164.1|	1189419122	87.9	5.45e-13	Oryza sativa Indica Group cultivar Shuhui498 chromosome 8 sequence	-	-	-	-	-	-	-	-	-	-	-	-	-	-	-	-	-	GO:0043547	positive regulation of GTPase activity	GO:0005096	GTPase activator activity	GO:0005737	cytoplasm
TRINITY_DN58971_c3_g2	68.4351	29.0592	1.2357	0.007025	1	gi|326496236|dbj|BAJ94580.1|	326496236	108	9.94e-22	predicted protein [Hordeum vulgare subsp. vulgare]	gi|18640658|gb|AC084766.8|	18640658	169	5.46e-37	Oryza sativa chromosome 3 BAC OSJNBb0048D20 genomic sequence, complete sequence	-	-	-	-	-	--	--	--	--	K18158	nuclear control of ATPase protein 2	--	-	-	-	PF08637.10	NCA2	GO:0044249	cellular biosynthetic process	--	--	GO:0016020//GO:0009536//GO:0005739	membrane//plastid//mitochondrion
TRINITY_DN64631_c1_g1	34.3139	14.6155	1.2313	0.042599	1	gi|474040031|gb|EMS53264.1|	474040031	143	2.06e-36	Cysteinyl-tRNA synthetase [Triticum urartu]	gi|1149719625|ref|XR_002234847.1|	1149719625	67.6	7.19e-07	PREDICTED: Aegilops tauschii subsp. tauschii uncharacterized LOC109771483 (LOC109771483), ncRNA	gi|187629854|sp|A5WEW9.1|SYC_PSYWF	187629854	30.8	2.27e-06	RecName: Full=Cysteine--tRNA ligase; AltName: Full=Cysteinyl-tRNA synthetase; Short=CysRS	-	-	-	-	-	-	-	KOG2007	J	Cysteinyl-tRNA synthetase	PF01406.19	tRNA-synt_1e	-	-	-	-	-	-
TRINITY_DN59241_c3_g2	44.8753	19.2179	1.2235	0.02958	1	gi|474074279|gb|EMS54479.1|	474074279	133	1.28e-33	hypothetical protein TRIUR3_14827 [Triticum urartu]	gi|1149744856|ref|XR_002237287.1|	1149744856	124	1.61e-23	PREDICTED: Aegilops tauschii subsp. tauschii uncharacterized LOC109781442 (LOC109781442), transcript variant X5, ncRNA	-	-	-	-	-	-	-	-	-	-	-	-	-	-	-	PF13260.6	DUF4051	--	--	--	--	GO:0016021	integral component of membrane
TRINITY_DN55892_c3_g2	50.7804	21.8048	1.2196	0.018954	1	gi|514815655|ref|XP_004982579.1|	514815655	70.9	5.48e-10	protein FAR1-RELATED SEQUENCE 5 [Setaria italica]	gi|1251770263|dbj|AK452078.1|	1251770263	132	6.36e-26	Triticum aestivum mRNA, clone: tplb0053g17, cultivar Chinese Spring	gi|75213627|sp|Q9SZL8.1|FRS5_ARATH	75213627	62	1.07e-08	RecName: Full=Protein FAR1-RELATED SEQUENCE 5	-	-	-	-	-	-	-	-	-	-	PF03101.15//PF10984.8	FAR1//DUF2794	-	-	-	-	-	-
TRINITY_DN62876_c3_g1	54.2715	23.5462	1.2047	0.015362	1	gi|473890577|gb|EMS48630.1|	473890577	84	1.71e-13	U-box domain-containing protein 7 [Triticum urartu]	gi|1149726503|ref|XR_002235653.1|	1149726503	424	1.69e-113	PREDICTED: Aegilops tauschii subsp. tauschii uncharacterized LOC109774789 (LOC109774789), transcript variant X2, ncRNA	-	-	-	-	-	-	-	-	-	-	-	-	-	-	-	-	-	GO:0006779//GO:0016567//GO:0055114	porphyrin-containing compound biosynthetic process//protein ubiquitination//oxidation-reduction process	GO:0004729//GO:0004842	oxygen-dependent protoporphyrinogen oxidase activity//ubiquitin-protein transferase activity	--	--
TRINITY_DN44727_c0_g1	72.6616	31.8676	1.1891	0.029846	1	gi|992169336|gb|KXG29766.1|	992169336	63.5	3.09e-07	hypothetical protein SORBI_3004G087700 [Sorghum bicolor]	gi|1002843747|ref|XM_015833795.1|	1002843747	2542	0	PREDICTED: Oryza brachyantha ABC transporter G family member 39 (LOC102715449), mRNA	gi|75336094|sp|Q9M9E1.1|AB40G_ARATH	75336094	61.6	4.02e-08	RecName: Full=ABC transporter G family member 40; Short=ABC transporter ABCG.40; Short=AtABCG40; AltName: Full=Pleiotropic drug resistance protein 12	-	-	-	-	-	-	-	KOG0065	Q	Pleiotropic drug resistance proteins (PDR1-15), ABC superfamily	PF01061.24//PF00005.27//PF08370.11	ABC2_membrane//ABC_tran//PDR_assoc	GO:0055085	transmembrane transport	GO:0042626//GO:0005524	ATPase-coupled transmembrane transporter activity//ATP binding	GO:0005886//GO:0016021	plasma membrane//integral component of membrane
TRINITY_DN61621_c0_g2	35.8509	15.7781	1.1841	0.042144	1	gi|474449613|gb|EMS68783.1|	474449613	59.7	1.53e-06	hypothetical protein TRIUR3_16389 [Triticum urartu]	gi|1149755295|ref|XM_020344017.1|	1149755295	470	1.25e-127	PREDICTED: Aegilops tauschii subsp. tauschii pentatricopeptide repeat-containing protein At1g63070, mitochondrial-like (LOC109785412), transcript variant X1, mRNA	gi|75274469|sp|Q9LW84.1|PP236_ARATH	75274469	53.1	6.14e-06	RecName: Full=Pentatricopeptide repeat-containing protein At3g16010	-	-	-	-	-	-	-	KOG4197	R	FOG: PPR repeat	PF13041.6	PPR_2	-	-	-	-	-	-
TRINITY_DN59127_c2_g1	42.1634	18.6676	1.1755	0.039403	1	gi|326494086|dbj|BAJ85505.1|	326494086	115	3.67e-24	predicted protein [Hordeum vulgare subsp. vulgare]	gi|326494085|dbj|AK354286.1|	326494085	257	1.32e-63	Hordeum vulgare subsp. vulgare mRNA for predicted protein, complete cds, clone: NIASHv1006F09	-	-	-	-	-	-	-	-	-	-	-	-	-	-	-	PF04795.12	PAPA-1	GO:0006355//GO:0006338	regulation of transcription, DNA-templated//chromatin remodeling	--	--	GO:0031011	Ino80 complex
TRINITY_DN46990_c0_g2	36.3379	16.1081	1.1737	0.048864	1	gi|669029371|emb|CDM83547.1|	669029371	57.4	1.19e-06	unnamed protein product [Triticum aestivum]	gi|1318868142|gb|MG587514.1|	1318868142	1177	0	Triticum aestivum cultivar NGB6409 malate dehydrogenase (MdhA) gene, partial cds	gi|126894|sp|P19446.1|MDHG_CITLA	126894	89.4	7.31e-19	RecName: Full=Malate dehydrogenase, glyoxysomal; Flags: Precursor	Metabolism	Global and overview maps	Carbon metabolism	ko01200	K00026	malate dehydrogenase	1.1.1.37	KOG1494	C	NAD-dependent malate dehydrogenase	PF02866.18	Ldh_1_C	GO:0005975//GO:0006108//GO:0006099	carbohydrate metabolic process//malate metabolic process//tricarboxylic acid cycle	GO:0030060	L-malate dehydrogenase activity	--	--
TRINITY_DN63101_c4_g1	62.6093	27.8372	1.1694	0.012204	1	gi|326524217|dbj|BAJ97119.1|	326524217	62	2.36e-07	predicted protein [Hordeum vulgare subsp. vulgare]	gi|1251766084|dbj|AK447595.1|	1251766084	100	1.5e-16	Triticum aestivum mRNA, clone: tplb0034m04, cultivar Chinese Spring	gi|338817657|sp|B9G2A8.1|BIG_ORYSJ	338817657	54.3	2.88e-06	RecName: Full=Auxin transport protein BIG	-	-	-	-	-	-	-	-	-	-	PF01250.17	Ribosomal_S6	GO:0006468	protein phosphorylation	GO:0005524//GO:0004674	ATP binding//protein serine/threonine kinase activity	--	--
TRINITY_DN64065_c1_g1	39.2927	17.5403	1.1636	0.035019	1	gi|56784643|dbj|BAD81690.1|	56784643	67	2.4e-57	helicase-like protein [Oryza sativa Japonica Group]	-	-	-	-	-	-	-	-	-	-	-	-	-	-	-	-	-	KOG0851	L	Single-stranded DNA-binding replication protein A (RPA), large (70 kD) subunit and related ssDNA-binding proteins	-	-	-	-	-	-	-	-
TRINITY_DN57460_c0_g3	34.4196	15.3909	1.1612	0.04957	1	gi|326493498|dbj|BAJ85210.1|	326493498	147	2.68e-38	predicted protein [Hordeum vulgare subsp. vulgare]	gi|1162497526|ref|XM_008659795.2|	1162497526	97.1	1.25e-15	PREDICTED: Zea mays Retrovirus-related Pol polyprotein LINE-1 (LOC100191643), transcript variant X2, mRNA	gi|75146625|sp|Q84JB8.1|RUS3_ARATH	75146625	53.1	1.48e-06	RecName: Full=Protein root UVB sensitive 3	--	--	--	--	K00898	pyruvate dehydrogenase kinase 2/3/4	2.7.11.2	KOG0787	T	Dehydrogenase kinase	PF04884.14//PF10436.9	DUF647//BCDHK_Adom3	GO:0046777//GO:0007165	protein autophosphorylation//signal transduction	GO:0000155//GO:0009927//GO:0005524//GO:0042803	phosphorelay sensor kinase activity//histidine phosphotransfer kinase activity//ATP binding//protein homodimerization activity	--	--
TRINITY_DN63946_c3_g1	64.3546	28.8053	1.1597	0.013403	1	gi|474063556|gb|EMS54061.1|	474063556	53.9	7.7e-06	hypothetical protein TRIUR3_21283 [Triticum urartu]	-	-	-	-	-	-	-	-	-	-	-	-	-	-	-	-	-	-	-	-	PF14255.6	Cys_rich_CPXG	-	-	-	-	-	-
TRINITY_DN55694_c0_g2	87.5422	39.2714	1.1565	0.0074219	1	gi|284434672|gb|ADB85379.1|	284434672	182	1.33e-48	putative retrotransposon protein [Phyllostachys edulis]	-	-	-	-	-	gi|2498845|sp|Q92372.1|RFA1_SCHPO	2498845	55.5	2.38e-06	RecName: Full=Replication factor A protein 1; AltName: Full=Single-stranded DNA-binding protein p68 subunit	Genetic Information Processing	Replication and repair	Fanconi anemia pathway	ko03460	K07466	replication factor A1	--	-	-	-	PF14214.6//PF02721.14//PF16900.5	Helitron_like_N//DUF223//REPA_OB_2	-	-	-	-	-	-
TRINITY_DN64689_c1_g1	36.3363	16.4567	1.1427	0.048385	1	gi|357122624|ref|XP_003563015.1|	357122624	55.1	8.53e-06	phospholipase A I [Brachypodium distachyon]	gi|1149738990|ref|XM_020337904.1|	1149738990	202	2.03e-47	PREDICTED: Aegilops tauschii subsp. tauschii uncharacterized LOC109779306 (LOC109779306), transcript variant X1, mRNA	-	-	-	-	-	-	-	-	-	-	-	-	-	-	-	-	-	-	-	-	-	-	-
TRINITY_DN64050_c2_g1	43.8603	19.917	1.1389	0.03479	1	gi|357115671|ref|XP_003559610.1|	357115671	141	4.33e-37	protein transport protein sec31 [Brachypodium distachyon]	gi|40316850|gb|AC137991.3|	40316850	231	3.91e-56	Oryza sativa chromosome 3 BAC OSJNBa0034D21 genomic sequence, complete sequence	-	-	-	-	-	-	-	-	-	-	-	-	-	-	-	PF14368.6//PF05038.13	LTP_2//Cytochrom_B558a	--	--	--	--	GO:0016021//GO:0016023	integral component of membrane//
TRINITY_DN57125_c1_g1	43.0528	19.6	1.1352	0.03963	1	gi|326528857|dbj|BAJ97450.1|	326528857	218	8.96e-56	predicted protein [Hordeum vulgare subsp. vulgare]	gi|1492102002|ref|XM_026809603.1|	1492102002	370	2.51e-97	PREDICTED: Phoenix dactylifera respiratory burst oxidase homolog protein C-like (LOC103720078), transcript variant X3, mRNA	gi|75098431|sp|O48538.1|RBOHF_ARATH	75098431	150	2.33e-35	RecName: Full=Respiratory burst oxidase homolog protein F; AltName: Full=Cytochrome b245 beta chain homolog RbohAp108; AltName: Full=NADPH oxidase RBOHF; Short=AtRBOHF	-	-	-	-	-	-	-	KOG0039	PQ	Ferric reductase, NADH/NADPH oxidase and related proteins	PF08414.10//PF01794.19//PF08022.12//PF08030.12	NADPH_Ox//Ferric_reduct//FAD_binding_8//NAD_binding_6	--	--	GO:0016491	oxidoreductase activity	GO:0016020	membrane
TRINITY_DN64572_c5_g1	60.3946	28.0338	1.1073	0.020212	1	gi|149392657|gb|ABR26131.1|	149392657	99.8	4.44e-23	osgrx_s14 - glutaredoxin subgroup ii, partial [Oryza sativa Indica Group]	gi|27228823|gb|AC096688.4|	27228823	213	1.44e-50	Oryza sativa chromosome 3 BAC OSJNBa0015N08 genomic sequence, complete sequence	gi|119370633|sp|Q8LBK6.2|GRS15_ARATH	119370633	59.7	1.96e-09	RecName: Full=Monothiol glutaredoxin-S15, mitochondrial; Short=AtGrxS15; Flags: Precursor	-	-	-	-	-	-	-	KOG0911	O	Glutaredoxin-related protein	PF00462.24//PF09113.10	Glutaredoxin//N-glycanase_C	GO:0045454//GO:0055085//GO:0006812//GO:0055114	cell redox homeostasis//transmembrane transport//cation transport//oxidation-reduction process	GO:0046872//GO:0009055//GO:0051537//GO:0015035//GO:0015297	metal ion binding//electron transfer activity//2 iron, 2 sulfur cluster binding//protein disulfide oxidoreductase activity//antiporter activity	GO:0009941//GO:0009570	chloroplast envelope//chloroplast stroma
TRINITY_DN49566_c1_g1	80.4911	37.4141	1.1052	0.010841	1	gi|110288969|gb|AAP53328.2|	110288969	63.5	1.42e-07	transposon protein, putative, CACTA, En/Spm sub-class [Oryza sativa Japonica Group]	gi|1149698793|ref|XM_020294481.1|	1149698793	156	4.06e-33	PREDICTED: Aegilops tauschii subsp. tauschii uncharacterized LOC109735275 (LOC109735275), mRNA	-	-	-	-	-	-	-	-	-	-	-	-	-	-	-	PF13963.6	Transpos_assoc	-	-	-	-	-	-
TRINITY_DN65409_c0_g3	66.0287	30.7838	1.1009	0.028868	1	gi|77552113|gb|ABA94910.1|	77552113	746	0	transposon protein, putative, CACTA, En/Spm sub-class [Oryza sativa Japonica Group]	gi|188038071|gb|EU660892.1|	188038071	91.6	1.29e-13	Triticum aestivum clone BAC 1354M21 cytosolic acetyl-CoA carboxylase (Acc-2) and putative amino acid permeases genes, complete cds	gi|127243|sp|P15268.1|MOSA_MAIZE	127243	55.1	1.92e-06	RecName: Full=Autonomous transposable element EN-1 mosaic protein; AltName: Full=Suppressor-mutator system protein; Short=SPM	-	-	-	-	-	-	-	-	-	-	PF13963.6//PF02992.14	Transpos_assoc//Transposase_21	-	-	-	-	-	-
TRINITY_DN54824_c1_g1	43.1349	20.2638	1.09	0.043027	1	gi|473933850|gb|EMS50084.1|	473933850	73.9	6.42e-14	hypothetical protein TRIUR3_18899 [Triticum urartu]	gi|591390447|gb|JX295577.2|	591390447	89.8	2.8e-13	Aegilops tauschii chromosome 1Ds prolamin gene locus, complete sequence	-	-	-	-	-	-	-	-	-	-	-	-	-	-	-	-	-	-	-	-	-	-	-
TRINITY_DN49273_c0_g1	774.947	365.889	1.0827	0.035243	1	gi|669028097|emb|CDM81776.1|	669028097	290	6.71e-91	unnamed protein product [Triticum aestivum]	gi|1149808487|ref|XM_020308177.1|	1149808487	147	1.33e-30	PREDICTED: Aegilops tauschii subsp. tauschii uncharacterized LOC109749193 (LOC109749193), mRNA	-	-	-	-	-	-	-	-	-	-	-	-	-	-	-	PF05432.11	BSP_II	-	-	-	-	-	-
TRINITY_DN61205_c1_g3	43.3478	20.5087	1.0797	0.040463	1	gi|1002299023|ref|XP_015612916.1|	1002299023	112	4.82e-29	NEP1-interacting protein 1 [Oryza sativa Japonica Group]	gi|238011689|gb|BT086527.1|	238011689	294	1.65e-75	Zea mays full-length cDNA clone ZM_BFc0177K15 mRNA, complete cds	gi|68565196|sp|Q8GT75.2|NIP1_ARATH	68565196	54.7	1.87e-08	RecName: Full=NEP1-interacting protein 1; AltName: Full=RING-H2 finger protein ATL26	-	-	-	-	-	-	-	KOG0800	O	FOG: Predicted E3 ubiquitin ligase	PF13441.6	Gly-zipper_YMGG	--	--	GO:0008270	zinc ion binding	GO:0016021	integral component of membrane
TRINITY_DN49614_c2_g1	59.6173	28.2284	1.0786	0.03718	1	gi|514812682|ref|XP_004981133.1|	514812682	138	7.73e-31	probable cellulose synthase A catalytic subunit 5 [UDP-forming] [Setaria italica]	gi|1149699968|ref|XR_002227460.1|	1149699968	134	2.16e-26	PREDICTED: Aegilops tauschii subsp. tauschii uncharacterized LOC109740871 (LOC109740871), transcript variant X8, ncRNA	gi|75325284|sp|Q6YVM4.1|CESA6_ORYSJ	75325284	82.4	7.87e-15	RecName: Full=Probable cellulose synthase A catalytic subunit 6 [UDP-forming]; AltName: Full=OsCesA6	--	--	--	--	K10999	cellulose synthase A	2.4.1.12	-	-	-	-	-	GO:0009987	cellular process	GO:0046872//GO:0016757	metal ion binding//transferase activity, transferring glycosyl groups	GO:0016020	membrane
TRINITY_DN65806_c1_g2	44.4487	21.1054	1.0745	0.044925	1	gi|15233349|ref|NP_195308.1|	15233349	252	6.63e-76	aconitase 1 [Arabidopsis thaliana]	gi|1149776948|ref|XM_020323565.1|	1149776948	555	1.08e-153	PREDICTED: Aegilops tauschii subsp. tauschii putative aconitate hydratase, cytoplasmic (LOC109764785), mRNA	gi|2492644|sp|Q90875.1|ACOC_CHICK	2492644	197	4.89e-57	RecName: Full=Cytoplasmic aconitate hydratase; Short=Aconitase; AltName: Full=Citrate hydro-lyase; AltName: Full=Iron-responsive element-binding protein 1; Short=IRE-BP 1	-	-	-	-	-	-	-	KOG0452	AJ	RNA-binding translational regulator IRP (aconitase superfamily)	PF00330.20	Aconitase	GO:0006952//GO:0009693//GO:0071281//GO:0009651//GO:0071398//GO:0006099//GO:0051365//GO:0006102//GO:0071732//GO:0006101	defense response//ethylene biosynthetic process//cellular response to iron ion//response to salt stress//cellular response to fatty acid//tricarboxylic acid cycle//cellular response to potassium ion starvation//isocitrate metabolic process//cellular response to nitric oxide//citrate metabolic process	GO:0005507//GO:0009815//GO:0051539//GO:0031418//GO:0048027//GO:0003994	copper ion binding//1-aminocyclopropane-1-carboxylate oxidase activity//4 iron, 4 sulfur cluster binding//L-ascorbic acid binding//mRNA 5'-UTR binding//aconitate hydratase activity	GO:0005829//GO:0005739//GO:0009506//GO:0005773//GO:0005886//GO:0048046	cytosol//mitochondrion//plasmodesma//vacuole//plasma membrane//apoplast
TRINITY_DN62558_c2_g1	50.529	24.1063	1.0677	0.031265	1	gi|960470030|ref|XP_003566833.3|	960470030	363	2.64e-121	leucine-rich repeat extensin-like protein 3 [Brachypodium distachyon]	gi|937893927|dbj|AP014957.1|	937893927	652	0	Oryza sativa Japonica Group DNA, chromosome 1, cultivar: Nipponbare, complete sequence	gi|75338632|sp|Q9XIB6.1|PLRX2_ARATH	75338632	52	2.12e-06	RecName: Full=Pollen-specific leucine-rich repeat extensin-like protein 2; Short=AtPEX2; Short=Pollen-specific LRR/EXTENSIN2; AltName: Full=Cell wall hydroxyproline-rich glycoprotein; Flags: Precursor	-	-	-	-	-	-	-	-	-	-	PF08263.12//PF13855.6	LRRNT_2//LRR_8	--	--	--	--	GO:0016023
TRINITY_DN158599_c0_g1	73.761	35.3395	1.0616	0.015471	1	gi|323134589|gb|ADX31265.1|	323134589	393	7.44e-122	unknown [Triticum aestivum]	gi|241988677|dbj|AK335934.1|	241988677	91.6	8.65e-14	Triticum aestivum cDNA, clone: SET2_N04, cultivar: Chinese Spring	-	-	-	-	-	-	-	-	-	-	-	-	-	-	-	PF07456.11//PF03732.17	Hpre_diP_synt_I//Retrotrans_gag	GO:0008152	metabolic process	GO:0003824	catalytic activity	--	--
TRINITY_DN60150_c0_g7	43.7639	21.0075	1.0588	0.048188	1	gi|473787031|gb|EMS46249.1|	473787031	97.4	2.1e-59	Monocopper oxidase-like protein SKU5 [Triticum urartu]	gi|1516541655|emb|LR031577.1|	1516541655	71.3	8.54e-08	Brassica rapa genome, scaffold: A10	gi|114268|sp|Q00624.1|ASOL_BRANA	114268	62.4	2.83e-09	RecName: Full=L-ascorbate oxidase homolog; Flags: Precursor [Brassica napus]	-	-	-	-	-	-	-	KOG1263	Q	Multicopper oxidases	PF07732.15	Cu-oxidase_3	GO:0055114	oxidation-reduction process	GO:0016722//GO:0005507	oxidoreductase activity, oxidizing metal ions//copper ion binding	GO:0009505//GO:0009506//GO:0016023	plant-type cell wall//plasmodesma//
TRINITY_DN50546_c0_g1	120.496	58.0793	1.0529	0.0086017	1	gi|357167375|ref|XP_003581132.1|	357167375	73.9	8.4e-11	phototropin-2 [Brachypodium distachyon]	gi|1371096549|ref|XM_010241486.3|	1371096549	2050	0	PREDICTED: Brachypodium distachyon phototropin-2 (LOC100844338), transcript variant X4, mRNA	gi|75262414|sp|Q9FG74.1|D6PK_ARATH	75262414	329	2.67e-103	RecName: Full=Serine/threonine-protein kinase D6PK; AltName: Full=D6 protein kinase; AltName: Full=Serine/threonine-protein kinase AGC1-1; AltName: Full=Serine/threonine-protein kinase AtPK64	-	-	-	-	-	-	-	-	-	-	PF13426.7//PF00069.25	PAS_9//Pkinase	GO:0009735//GO:0010118//GO:0009638//GO:0018298//GO:0010362//GO:0006355//GO:0023014//GO:0000160//GO:0007018//GO:0009785	response to cytokinin//stomatal movement//phototropism//protein-chromophore linkage//negative regulation of anion channel activity by blue light//regulation of transcription, DNA-templated//signal transduction by protein phosphorylation//phosphorelay signal transduction system//microtubule-based movement//blue light signaling pathway	GO:0009882//GO:0005198//GO:0000155//GO:0004674//GO:0042802//GO:0005524//GO:0010181	blue light photoreceptor activity//structural molecule activity//phosphorelay sensor kinase activity//protein serine/threonine kinase activity//identical protein binding//ATP binding//FMN binding	GO:0005794//GO:0005874//GO:0005886//GO:0005634	Golgi apparatus//microtubule//plasma membrane//nucleus
TRINITY_DN60218_c1_g5	158.78	76.673	1.0502	0.033513	1	gi|721622640|ref|XP_003561708.2|	721622640	207	9.13e-63	uncharacterized protein LOC100830077 [Brachypodium distachyon]	gi|1256700621|ref|XM_004984591.4|	1256700621	152	2.46e-32	PREDICTED: Setaria italica uncharacterized LOC101763788 (LOC101763788), mRNA	-	-	-	-	-	-	-	-	-	-	-	-	-	-	-	PF05553.11	DUF761	--	--	--	--	GO:0012505//GO:0043231//GO:0044444	endomembrane system//intracellular membrane-bounded organelle//cytoplasmic part
TRINITY_DN52618_c0_g2	49.1649	23.825	1.0452	0.048957	1	gi|326490129|dbj|BAJ94138.1|	326490129	143	6.04e-38	predicted protein [Hordeum vulgare subsp. vulgare]	gi|326513643|dbj|AK356624.1|	326513643	279	1.94e-70	Hordeum vulgare subsp. vulgare mRNA for predicted protein, complete cds, clone: NIASHv1037C08	-	-	-	-	-	-	-	-	-	-	-	-	KOG4595	S	Uncharacterized conserved protein	PF09811.9	Yae1_N	GO:0042273	ribosomal large subunit biogenesis	--	--	--	--
TRINITY_DN60966_c0_g1	75.4319	36.8461	1.0337	0.018475	1	gi|326515040|dbj|BAJ99881.1|	326515040	142	3.44e-31	predicted protein [Hordeum vulgare subsp. vulgare]	gi|1002841083|ref|XM_015833001.1|	1002841083	833	0	PREDICTED: Oryza brachyantha putative multidrug resistance protein (LOC102699372), mRNA	gi|75338892|sp|Q9ZR72.1|AB1B_ARATH	75338892	142	7.4e-33	RecName: Full=ABC transporter B family member 1; Short=ABC transporter ABCB.1; Short=AtABCB1; AltName: Full=Multidrug resistance protein 1; AltName: Full=P-glycoprotein 1; Short=AtPgp1	Human Diseases	Cancers: Overview	MicroRNAs in cancer	ko05206	K05658	ATP-binding cassette, subfamily B (MDR/TAP), member 1	3.6.3.44	KOG0055	Q	Multidrug/pheromone exporter, ABC superfamily	PF00664.23//PF00005.27//PF09237.11	ABC_membrane//ABC_tran//GAGA	GO:0055085	transmembrane transport	GO:0042626//GO:0005524	ATPase-coupled transmembrane transporter activity//ATP binding	GO:0016021	integral component of membrane
TRINITY_DN50979_c3_g4	119.558	58.5503	1.03	0.0075617	1	gi|474242977|gb|EMS59883.1|	474242977	68.2	2.56e-10	hypothetical protein TRIUR3_15451 [Triticum urartu]	gi|1149708740|ref|XR_002233523.1|	1149708740	165	2.51e-36	PREDICTED: Aegilops tauschii subsp. tauschii uncharacterized LOC109766105 (LOC109766105), transcript variant X2, ncRNA	-	-	-	-	-	-	-	-	-	-	-	-	-	-	-	-	-	--	--	--	--	GO:0016020	membrane
TRINITY_DN44267_c0_g1	107.159	52.5816	1.0271	0.0074957	1	gi|474190743|gb|EMS58128.1|	474190743	79	5.25e-13	Ethylene-insensitive protein 2 [Triticum urartu]	gi|1149823145|ref|XM_020314133.1|	1149823145	224	7.65e-54	PREDICTED: Aegilops tauschii subsp. tauschii protein ETHYLENE-INSENSITIVE 2-like (LOC109755236), transcript variant X1, mRNA	gi|20455059|sp|Q8ZSB0.1|MNTH_NOSS1	20455059	54.7	1e-06	RecName: Full=Divalent metal cation transporter MntH	-	-	-	-	-	-	-	KOG1291	P	Mn2+ and Fe2+ transporters of the NRAMP family	PF01566.18	Nramp	GO:0006979//GO:0009873//GO:0006810//GO:0055114//GO:0098869	response to oxidative stress//ethylene-activated signaling pathway//transport//oxidation-reduction process//cellular oxidant detoxification	GO:0046872//GO:0004601//GO:0020037//GO:0005215	metal ion binding//peroxidase activity//heme binding//transporter activity	GO:0016021//GO:0016023	integral component of membrane//
TRINITY_DN56311_c1_g1	88.8983	44.0423	1.0133	0.015929	1	gi|326527447|dbj|BAK07998.1|	326527447	35.4	7.81e-16	predicted protein [Hordeum vulgare subsp. vulgare]	gi|1149841504|ref|XM_020321022.1|	1149841504	95.3	1.74e-14	PREDICTED: Aegilops tauschii subsp. tauschii kinesin-like protein KIN-10A (LOC109762208), mRNA	-	-	-	-	-	-	-	-	-	-	-	-	KOG1198	CR	Zinc-binding oxidoreductase	-	-	-	-	-	-	-	-
TRINITY_DN65652_c1_g2	58.9836	29.46	1.0016	0.030008	1	gi|960486503|ref|XP_014758141.1|	960486503	205	3.75e-52	uncharacterized protein LOC100845829 isoform X2 [Brachypodium distachyon]	gi|1371087901|ref|XM_024463531.1|	1371087901	196	2.99e-45	PREDICTED: Brachypodium distachyon uncharacterized LOC100831776 (LOC100831776), transcript variant X5, mRNA	gi|75075713|sp|Q4R4I8.1|COPB2_MACFA	75075713	140	9.88e-33	RecName: Full=Coatomer subunit beta'; AltName: Full=Beta'-coat protein; Short=Beta'-COP	-	-	-	-	-	-	-	KOG0276	U	Vesicle coat complex COPI, beta' subunit	PF11406.8//PF00069.25//PF00635.26//PF00400.32	Tachystatin_A//Pkinase//Motile_Sperm//WD40	-	-	-	-	-	-
TRINITY_DN54737_c0_g1	28.2877	56.6049	-1.0008	0.037439	1	gi|242081123|ref|XP_002445330.1|	242081123	590	0	aspartyl protease family protein At5g10770 [Sorghum bicolor]	gi|932283207|gb|CP012616.1|	932283207	1186	0	Oryza sativa Indica Group cultivar RP Bio-226 chromosome 8 sequence	gi|158513711|sp|A2ZC67.2|ASP1_ORYSI	158513711	58.9	6.35e-08	RecName: Full=Aspartic proteinase Asp1; Short=OSAP1; Short=OsAsp1; AltName: Full=Nucellin-like protein; Flags: Precursor	-	-	-	-	-	-	-	KOG1339	O	Aspartyl protease	PF14543.6//PF14541.6	TAXi_N//TAXi_C	GO:0030163//GO:0006508	protein catabolic process//proteolysis	GO:0004190	aspartic-type endopeptidase activity	GO:0048046//GO:0016023//GO:0005739	apoplast////mitochondrion
TRINITY_DN50944_c1_g1	42.4376	84.9689	-1.0016	0.024691	1	gi|960465610|ref|XP_014753945.1|	960465610	246	1.96e-75	probable membrane-associated kinase regulator 3 [Brachypodium distachyon]	gi|6863078|dbj|AP001111.1|	6863078	69.4	3.84e-07	Oryza sativa genomic DNA, chromosome 5, clone:P0699E04	-	-	-	-	-	-	-	-	-	-	-	-	-	-	-	PF07816.11	DUF1645	-	-	-	-	-	-
TRINITY_DN46719_c0_g1	31.9524	64.1231	-1.0049	0.024593	1	gi|473971115|gb|EMS51463.1|	473971115	154	1.55e-44	hypothetical protein TRIUR3_26192 [Triticum urartu]	gi|242381202|emb|FP096673.1|	242381202	100	8.58e-17	Phyllostachys edulis cDNA clone: bphylf048h24, full insert sequence	-	-	-	-	-	-	-	-	-	-	-	-	-	-	-	-	-	-	-	-	-	-	-
TRINITY_DN43763_c0_g1	32.1832	65.0032	-1.0142	0.024029	1	gi|473945846|gb|EMS50543.1|	473945846	117	1.83e-31	Putative lipid-transfer protein DIR1 [Triticum urartu]	gi|195657482|gb|EU976091.1|	195657482	250	5.48e-62	Zea mays clone 619344 PVR3-like protein mRNA, complete cds	gi|75162405|sp|Q8W453.1|DIRL1_ARATH	75162405	60.8	3.82e-11	RecName: Full=Putative lipid-transfer protein DIR1; AltName: Full=Protein DEFECTIVE IN INDUCED RESISTANCE 1; Flags: Precursor	-	-	-	-	-	-	-	-	-	-	PF14368.6	LTP_2	--	--	--	--	GO:0016023
TRINITY_DN54889_c1_g2	29.3276	59.7039	-1.0256	0.026272	1	gi|1002851495|ref|XP_015691558.1|	1002851495	288	6.36e-92	PREDICTED: transcription factor bHLH96-like [Oryza brachyantha]	gi|1256609637|ref|XM_004976590.3|	1256609637	416	1.21e-111	PREDICTED: Setaria italica transcription factor bHLH96 (LOC101754406), mRNA	gi|75312289|sp|Q9M8K6.1|MUTE_ARATH	75312289	85.9	4.31e-18	RecName: Full=Transcription factor MUTE; AltName: Full=Basic helix-loop-helix protein 45; Short=AtbHLH45; Short=bHLH 45; AltName: Full=Transcription factor EN 20; AltName: Full=bHLH transcription factor bHLH045	-	-	-	-	-	-	-	-	-	-	PF00010.26	HLH	--	--	--	--	GO:0005634	nucleus
TRINITY_DN49756_c0_g3	64.6602	131.779	-1.0272	0.0034844	1	gi|474311848|gb|EMS61949.1|	474311848	185	5.56e-56	Expansin-B4 [Triticum urartu]	gi|1443045538|ref|XM_015759506.2|	1443045538	333	5.25e-87	PREDICTED: Oryza sativa Japonica Group expansin-B4-like (LOC4349350), mRNA	gi|75123238|sp|Q6H676.1|EXB11_ORYSJ	75123238	111	1.78e-28	RecName: Full=Expansin-B11; AltName: Full=Beta-expansin-11; AltName: Full=OsEXPB11; AltName: Full=OsaEXPb1.20; Flags: Precursor	-	-	-	-	-	-	-	-	-	-	PF01357.21	Pollen_allerg_1	GO:0071555//GO:0019953	cell wall organization//sexual reproduction	--	--	GO:0005576//GO:0016020//GO:0016023//GO:0005618	extracellular region//membrane////cell wall
TRINITY_DN48185_c0_g1	45.8929	93.9701	-1.0339	0.010909	1	gi|357129011|ref|XP_003566162.1|	357129011	98.2	1.81e-21	phytolongin Phyl2.1 [Brachypodium distachyon]	gi|932282494|gb|CP012609.1|	932282494	568	2.35e-157	Oryza sativa Indica Group cultivar RP Bio-226 chromosome 1 sequence	-	-	-	-	-	-	-	-	-	-	-	-	-	-	-	-	-	--	--	--	--	GO:0016021	integral component of membrane
TRINITY_DN53672_c1_g1	33.3457	68.3961	-1.0364	0.021896	1	gi|357137325|ref|XP_003570251.1|	357137325	129	9.93e-34	uncharacterized protein LOC100840010 [Brachypodium distachyon]	gi|1205950803|ref|XM_002451582.2|	1205950803	93.5	1.18e-14	PREDICTED: Sorghum bicolor uncharacterized LOC8077185 (LOC8077185), mRNA	-	-	-	-	-	-	-	-	-	-	-	-	-	-	-	PF03940.13	MSSP	-	-	-	-	-	-
TRINITY_DN65033_c0_g1	51.8561	106.387	-1.0367	0.0076622	1	gi|473906572|gb|EMS49391.1|	473906572	80.9	1.32e-16	hypothetical protein TRIUR3_03643 [Triticum urartu]	gi|241987941|dbj|AK335198.1|	241987941	296	7.88e-76	Triticum aestivum cDNA, clone: WT012_E23, cultivar: Chinese Spring	-	-	-	-	-	-	-	-	-	-	-	-	-	-	-	-	-	-	-	-	-	-	-
TRINITY_DN52445_c1_g1	31.7489	65.1929	-1.038	0.021291	1	gi|326501612|dbj|BAK02595.1|	326501612	218	3.39e-67	predicted protein [Hordeum vulgare subsp. vulgare]	gi|47497338|dbj|AP004153.3|	47497338	440	4.27e-119	Oryza sativa Japonica Group genomic DNA, chromosome 2, BAC clone:OJ1111_C07	gi|75319418|sp|Q38872.1|CDPK6_ARATH	75319418	105	4.79e-24	RecName: Full=Calcium-dependent protein kinase 6; AltName: Full=Calcium-dependent protein kinase isoform CDPK3; Short=AtCDPK3; AltName: Full=Calmodulin-domain protein kinase CDPK isoform 6	-	-	-	-	-	-	-	KOG0032	T	Ca2+/calmodulin-dependent protein kinase, EF-Hand protein superfamily	PF00069.25	Pkinase	GO:0018105//GO:0046777//GO:0035556//GO:0009738	peptidyl-serine phosphorylation//protein autophosphorylation//intracellular signal transduction//abscisic acid-activated signaling pathway	GO:0005516//GO:0009931//GO:0005524//GO:0004683	calmodulin binding//calcium-dependent protein serine/threonine kinase activity//ATP binding//calmodulin-dependent protein kinase activity	GO:0005737//GO:0005634//GO:0005886	cytoplasm//nucleus//plasma membrane
TRINITY_DN50876_c0_g1	109.587	226.082	-1.0448	0.00082154	1	gi|326506342|dbj|BAJ86489.1|	326506342	748	0	predicted protein [Hordeum vulgare subsp. vulgare]	gi|1443075644|ref|XM_015778126.2|	1443075644	1064	0	PREDICTED: Oryza sativa Japonica Group uncharacterized protein At4g06744 (LOC4336334), mRNA	gi|75339262|sp|Q4PSE6.1|LRX7_ARATH	75339262	216	7.15e-63	RecName: Full=Leucine-rich repeat extensin-like protein 7; Short=AtLRX7; Short=LRR/EXTENSIN7; AltName: Full=Cell wall hydroxyproline-rich glycoprotein; Flags: Precursor	-	-	-	-	-	-	-	-	-	-	-	-	--	--	--	--	GO:0016023
TRINITY_DN62575_c3_g1	24.0797	49.77	-1.0475	0.045423	1	gi|357132295|ref|XP_003567766.1|	357132295	335	4.88e-109	ABC transporter G family member 7 [Brachypodium distachyon]	gi|1443035552|ref|XM_015785372.2|	1443035552	597	2.08e-166	PREDICTED: Oryza sativa Japonica Group ABC transporter G family member 7 (LOC4326045), mRNA	gi|322510007|sp|Q7XA72.2|AB21G_ARATH	322510007	123	1.03e-30	RecName: Full=ABC transporter G family member 21; Short=ABC transporter ABCG.21; Short=AtABCG21; AltName: Full=White-brown complex homolog protein 21; Short=AtWBC21	-	-	-	-	-	-	-	KOG0061	Q	Transporter, ABC superfamily (Breast cancer resistance protein)	PF00005.27	ABC_tran	GO:0055085	transmembrane transport	GO:0042626//GO:0005524	ATPase-coupled transmembrane transporter activity//ATP binding	GO:0043190	ATP-binding cassette (ABC) transporter complex
TRINITY_DN64069_c3_g4	102.852	213.174	-1.0515	0.00096946	1	gi|326497901|dbj|BAJ94813.1|	326497901	287	4.5e-96	predicted protein [Hordeum vulgare subsp. vulgare]	gi|1149804067|ref|XM_020306474.1|	1149804067	603	3.95e-168	PREDICTED: Aegilops tauschii subsp. tauschii heat stress transcription factor C-2a-like (LOC109747408), mRNA	gi|729774|sp|P41152.1|HSF30_SOLPE	729774	152	2.88e-43	RecName: Full=Heat shock factor protein HSF30; AltName: Full=Heat shock transcription factor 30; Short=HSTF 30; AltName: Full=Heat stress transcription factor	--	--	--	--	K09419	heat shock transcription factor, other eukaryote	--	KOG0627	K	Heat shock transcription factor	PF00447.17	HSF_DNA-bind	GO:0006355	regulation of transcription, DNA-templated	GO:0043565//GO:0003700	sequence-specific DNA binding//DNA-binding transcription factor activity	GO:0005634	nucleus
TRINITY_DN48079_c0_g1	23.2872	48.491	-1.0582	0.03973	1	gi|326490948|dbj|BAJ90141.1|	326490948	493	5.25e-171	predicted protein [Hordeum vulgare subsp. vulgare]	gi|1477052660|ref|NM_001365937.1|	1477052660	830	0	Zea mays uncharacterized LOC100274870 (LOC100274870), mRNA	-	-	-	-	-	-	-	-	-	-	-	-	-	-	-	PF04434.17//PF05910.12	SWIM//DUF868	-	-	-	-	-	-
TRINITY_DN57828_c2_g1	21.4837	44.7433	-1.0584	0.048039	1	gi|326516712|dbj|BAJ96348.1|	326516712	92.4	4.38e-21	predicted protein [Hordeum vulgare subsp. vulgare]	gi|937901440|dbj|AP014958.1|	937901440	191	3.13e-44	Oryza sativa Japonica Group DNA, chromosome 2, cultivar: Nipponbare, complete sequence	-	-	-	-	-	-	-	-	-	-	-	-	-	-	-	-	-	-	-	-	-	-	-
TRINITY_DN48195_c0_g1	52.9681	110.951	-1.0667	0.01309	1	gi|937919058|dbj|BAS93976.1|	937919058	318	5.89e-105	Os05g0408800 [Oryza sativa Japonica Group]	gi|1315019612|ref|XM_020542683.2|	1315019612	558	1.55e-154	PREDICTED: Zea mays E3 ubiquitin-protein ligase SGR9, amyloplastic (LOC109941575), mRNA	gi|74761852|sp|Q9P0P0.1|RN181_HUMAN	74761852	49.7	3.84e-06	RecName: Full=E3 ubiquitin-protein ligase RNF181; AltName: Full=RING finger protein 181	-	-	-	-	-	-	-	KOG0800	O	FOG: Predicted E3 ubiquitin ligase	PF13639.6	zf-RING_2	GO:0000209//GO:0043161//GO:0009630	protein polyubiquitination//proteasome-mediated ubiquitin-dependent protein catabolic process//gravitropism	GO:0061630//GO:0008270	ubiquitin protein ligase activity//zinc ion binding	GO:0042787//GO:0009501	//amyloplast
TRINITY_DN52605_c0_g3	26.9533	56.6046	-1.0705	0.031294	1	gi|326500078|dbj|BAJ90874.1|	326500078	192	1.22e-59	predicted protein [Hordeum vulgare subsp. vulgare]	gi|554784300|dbj|AK438034.1|	554784300	573	3.73e-159	Brachypodium distachyon mRNA, clone: PL016C01-A-090_C14	gi|148887120|sp|Q2JI03.1|RL35_SYNJB	148887120	62	1.31e-11	RecName: Full=50S ribosomal protein L35	-	-	-	-	-	-	-	-	-	-	PF18278.1//PF01632.19	RANK_CRD_2//Ribosomal_L35p	GO:0006412	translation	GO:0003735	structural constituent of ribosome	GO:0005840	ribosome
TRINITY_DN62132_c3_g3	21.9021	46.1448	-1.0751	0.045619	1	gi|474411706|gb|EMS66847.1|	474411706	106	3.34e-25	5-pentadecatrienyl resorcinol O-methyltransferase [Triticum urartu]	gi|1002859850|ref|XM_006657024.2|	1002859850	67.6	5.07e-07	PREDICTED: Oryza brachyantha O-methyltransferase ZRP4-like (LOC102703789), mRNA	gi|75098146|sp|O24305.1|M3OM1_PEA	75098146	52	4.87e-07	RecName: Full=(+)-6a-hydroxymaackiain 3-O-methyltransferase 1; AltName: Full=Isoflavone 4'-O-methyltransferase	-	-	-	-	-	-	-	-	-	-	PF08100.11	Dimerisation	GO:0032259//GO:0019438	methylation//aromatic compound biosynthetic process	GO:0046983//GO:0008757//GO:0008171	protein dimerization activity//S-adenosylmethionine-dependent methyltransferase activity//O-methyltransferase activity	--	--
TRINITY_DN54936_c0_g2	22.5868	47.6216	-1.0761	0.039434	1	gi|326493752|dbj|BAJ85337.1|	326493752	136	1.81e-38	predicted protein [Hordeum vulgare subsp. vulgare]	gi|778729228|ref|XM_004135780.2|	778729228	86.1	7.95e-13	PREDICTED: Cucumis sativus auxin-induced protein IAA6 (LOC101222537), mRNA	gi|11131103|sp|O24542.1|AX22D_VIGRR	11131103	75.1	6.29e-17	RecName: Full=Auxin-induced protein 22D; AltName: Full=Indole-3-acetic acid-induced protein ARG13	-	-	-	-	-	-	-	-	-	-	PF02309.16	AUX_IAA	GO:0009734//GO:0006355	auxin-activated signaling pathway//regulation of transcription, DNA-templated	--	--	GO:0005634	nucleus
TRINITY_DN52566_c1_g1	736.205	1552.94	-1.0768	2.8692e-05	0.15668	gi|474222476|gb|EMS59332.1|	474222476	245	6.45e-75	hypothetical protein TRIUR3_25528 [Triticum urartu]	gi|1256563981|ref|XM_004970210.4|	1256563981	316	1.32e-81	PREDICTED: Setaria italica uncharacterized LOC101757323 (LOC101757323), mRNA	-	-	-	-	-	-	-	-	-	-	-	-	-	-	-	PF12937.7	F-box-like	-	-	-	-	-	-
TRINITY_DN64859_c0_g1	25.039	52.9034	-1.0792	0.03118	1	gi|326488809|dbj|BAJ98016.1|	326488809	433	6.54e-147	predicted protein [Hordeum vulgare subsp. vulgare]	gi|1435169292|ref|XM_025965469.1|	1435169292	564	2.06e-156	PREDICTED: Panicum hallii U-box domain-containing protein 19-like (LOC112897220), mRNA	gi|75107724|sp|Q5PNY6.1|PUB21_ARATH	75107724	80.1	5.72e-16	RecName: Full=U-box domain-containing protein 21; AltName: Full=Plant U-box protein 21	-	-	-	-	-	-	-	KOG0167	S	FOG: Armadillo/beta-catenin-like repeats	PF04564.15	U-box	GO:0016567	protein ubiquitination	GO:0004842	ubiquitin-protein transferase activity	GO:0005737//GO:0005634	cytoplasm//nucleus
TRINITY_DN57265_c1_g1	20.646	43.8227	-1.0858	0.041376	1	gi|326512238|dbj|BAJ96100.1|	326512238	319	6.9e-105	predicted protein [Hordeum vulgare subsp. vulgare]	gi|1371062587|ref|XM_003567200.4|	1371062587	560	3.81e-155	PREDICTED: Brachypodium distachyon GDSL esterase/lipase At2g40250 (LOC100844976), mRNA	gi|75165256|sp|Q94CH8.1|EXL1_ARATH	75165256	126	5.5e-32	RecName: Full=GDSL esterase/lipase EXL1; AltName: Full=Family II extracellular lipase 1; Short=Family II lipase EXL1; Flags: Precursor	-	-	-	-	-	-	-	-	-	-	PF00657.22	Lipase_GDSL	--	--	GO:0016788	hydrolase activity, acting on ester bonds	GO:0016023
TRINITY_DN63554_c2_g1	78.7789	167.861	-1.0914	0.0015476	1	gi|944066361|gb|KQK01952.1|	944066361	42.4	5e-25	hypothetical protein BRADI_3g59460v3 [Brachypodium distachyon]	gi|288856427|gb|AC190571.5|	288856427	180	6.64e-41	Zea mays BAC clone CH201-151G9 from chromosome 5, complete sequence	gi|20138387|sp|Q9LZ99.1|EXPA9_ARATH	20138387	35	3.12e-19	RecName: Full=Expansin-A9; Short=AtEXPA9; AltName: Full=Alpha-expansin-9; Short=At-EXP9; Short=AtEx9; AltName: Full=Ath-ExpAlpha-1.10; Flags: Precursor	-	-	-	-	-	-	-	-	-	-	PF03330.18	DPBB_1	GO:0009828//GO:0009826//GO:0009739//GO:0010119//GO:0010114//GO:0006949	plant-type cell wall loosening//unidimensional cell growth//response to gibberellin//regulation of stomatal movement//response to red light//syncytium formation	--	--	GO:0009505//GO:0005576//GO:0016020	plant-type cell wall//extracellular region//membrane
TRINITY_DN54558_c0_g4	876.096	1871.33	-1.0949	0.014571	1	gi|473948167|gb|EMS50609.1|	473948167	119	3.26e-25	hypothetical protein TRIUR3_23389 [Triticum urartu]	gi|195658256|gb|EU976478.1|	195658256	342	3.33e-89	Zea mays clone 895667 mRNA sequence	gi|48427908|sp|O80917.1|DRE2E_ARATH	48427908	85.9	2.37e-17	RecName: Full=Dehydration-responsive element-binding protein 2E; Short=Protein DREB2E	-	-	-	-	-	-	-	KOG1075	R	FOG: Reverse transcriptase	PF00847.20//PF13966.6//PF13456.6	AP2//zf-RVT//RVT_3	GO:0045893	positive regulation of transcription, DNA-templated	GO:0044212//GO:0043565//GO:0003700	transcription regulatory region DNA binding//sequence-specific DNA binding//DNA-binding transcription factor activity	GO:0005634	nucleus
TRINITY_DN60848_c0_g2	29.1366	62.4542	-1.1	0.02763	1	gi|357153850|ref|XP_003576587.1|	357153850	339	6.98e-112	homeobox-leucine zipper protein HOX11 [Brachypodium distachyon]	gi|212722079|ref|NM_001139090.1|	212722079	571	2.21e-158	Zea mays uncharacterized LOC100194027 (LOC100194027), mRNA	gi|462281|sp|Q05466.1|HAT4_ARATH	462281	204	2.71e-61	RecName: Full=Homeobox-leucine zipper protein HAT4; AltName: Full=HD-ZIP protein ATHB-2; AltName: Full=Homeodomain transcription factor ATHB-2; AltName: Full=Homeodomain-leucine zipper protein HAT4; Short=HD-ZIP protein 4	-	-	-	-	-	-	-	KOG0483	K	Transcription factor HEX, contains HOX and HALZ domains	PF00046.29//PF08961.10//PF02183.18	Homeodomain//NRBF2//HALZ	GO:0006355	regulation of transcription, DNA-templated	GO:0043565//GO:0003700	sequence-specific DNA binding//DNA-binding transcription factor activity	GO:0005634	nucleus
TRINITY_DN57815_c2_g1	33.2772	71.5693	-1.1048	0.0114	1	gi|474311848|gb|EMS61949.1|	474311848	137	7.69e-39	Expansin-B4 [Triticum urartu]	gi|32991190|dbj|AK105981.1|	32991190	196	3.6e-46	Oryza sativa Japonica Group cDNA clone:001-205-F12, full insert sequence	gi|75244875|sp|Q8H7T4.1|EXB10_ORYSJ	75244875	67.8	1.17e-13	RecName: Full=Expansin-B10; AltName: Full=Beta-expansin-10; AltName: Full=OsEXPB10; AltName: Full=OsaEXPb1.5; Flags: Precursor	-	-	-	-	-	-	-	-	-	-	-	-	GO:0071555//GO:0019953	cell wall organization//sexual reproduction	--	--	GO:0005576//GO:0016020//GO:0016023//GO:0005618	extracellular region//membrane////cell wall
TRINITY_DN52279_c0_g2	25.8979	56.0707	-1.1144	0.018586	1	gi|326519344|dbj|BAJ96671.1|	326519344	306	4.2e-98	predicted protein [Hordeum vulgare subsp. vulgare]	gi|1435170058|ref|XM_025965844.1|	1435170058	102	4.55e-17	PREDICTED: Panicum hallii transcription factor bHLH137-like (LOC112897533), transcript variant X1, mRNA	gi|75304461|sp|Q8VZ02.1|BH048_ARATH	75304461	110	1.7e-25	RecName: Full=Transcription factor bHLH48; AltName: Full=Basic helix-loop-helix protein 48; Short=AtbHLH48; Short=bHLH 48; AltName: Full=Transcription factor EN 97; AltName: Full=bHLH transcription factor bHLH048	-	-	-	-	-	-	-	-	-	-	PF00010.26	HLH	-	-	-	-	-	-
TRINITY_DN48388_c0_g1	28.1418	61.4334	-1.1263	0.015177	1	gi|474362927|gb|EMS63334.1|	474362927	349	1.31e-119	hypothetical protein TRIUR3_00507 [Triticum urartu]	gi|1002849809|ref|XM_006649184.2|	1002849809	592	1.25e-164	PREDICTED: Oryza brachyantha probable cytokinin riboside 5'-monophosphate phosphoribohydrolase LOGL3 (LOC102705510), transcript variant X3, mRNA	gi|75221639|sp|Q5BPS0.1|LOG2_ARATH	75221639	268	8.44e-89	RecName: Full=Cytokinin riboside 5'-monophosphate phosphoribohydrolase LOG2; AltName: Full=Protein LONELY GUY 2	-	-	-	-	-	-	-	-	-	-	PF03641.14	Lysine_decarbox	GO:0009691	cytokinin biosynthetic process	GO:0016799//GO:0016829	hydrolase activity, hydrolyzing N-glycosyl compounds//lyase activity	GO:0005634//GO:0005829//GO:0005739	nucleus//cytosol//mitochondrion
TRINITY_DN59163_c2_g3	522.458	1145.6	-1.1327	1.4273e-05	0.088107	gi|944066361|gb|KQK01952.1|	944066361	289	1.82e-97	hypothetical protein BRADI_3g59460v3 [Brachypodium distachyon]	gi|1197977591|ref|NM_001112172.2|	1197977591	488	7.41e-134	Zea mays alpha expansin 2 (LOC542648), mRNA	gi|20138387|sp|Q9LZ99.1|EXPA9_ARATH	20138387	233	2.19e-77	RecName: Full=Expansin-A9; Short=AtEXPA9; AltName: Full=Alpha-expansin-9; Short=At-EXP9; Short=AtEx9; AltName: Full=Ath-ExpAlpha-1.10; Flags: Precursor	-	-	-	-	-	-	-	-	-	-	PF03330.18//PF01357.21	DPBB_1//Pollen_allerg_1	GO:0009664	plant-type cell wall organization	--	--	GO:0005576//GO:0016020//GO:0005618	extracellular region//membrane//cell wall
TRINITY_DN49756_c0_g2	25.3519	55.6649	-1.1347	0.018188	1	gi|721626683|ref|XP_010229347.1|	721626683	238	7.13e-76	expansin-B7 [Brachypodium distachyon]	gi|1371045060|ref|XM_010231045.3|	1371045060	503	3.91e-138	PREDICTED: Brachypodium distachyon expansin-B7 (LOC100841884), mRNA	gi|115502388|sp|P58738.2|EXPB1_MAIZE	115502388	140	1.13e-39	RecName: Full=Expansin-B1; AltName: Full=Allergen Zea m 1d; AltName: Full=Beta-expansin-1a; AltName: Full=Pollen allergen Zea m 1; AltName: Full=ZmEXPB1; AltName: Allergen=Zea m 1; Flags: Precursor	-	-	-	-	-	-	-	-	-	-	PF01357.21	Pollen_allerg_1	GO:0019953	sexual reproduction	--	--	GO:0005576	extracellular region
TRINITY_DN65161_c1_g5	27.443	60.3181	-1.1362	0.015727	1	gi|326496417|dbj|BAJ94670.1|	326496417	219	6.92e-66	predicted protein [Hordeum vulgare subsp. vulgare]	gi|193884876|gb|AC229909.1|	193884876	466	6.85e-127	Oryza minuta clone OM__Ba0163A13, complete sequence	gi|75318317|sp|O48814.1|BIK1_ARATH	75318317	115	1.6e-28	RecName: Full=Serine/threonine-protein kinase BIK1; AltName: Full=Protein BOTRYTIS-INDUCED KINASE 1	-	-	-	-	-	-	-	KOG1187	T	Serine/threonine protein kinase	PF00069.25	Pkinase	GO:0006468	protein phosphorylation	GO:0005524//GO:0004674	ATP binding//protein serine/threonine kinase activity	GO:0009536	plastid
TRINITY_DN58442_c0_g3	81.3254	178.788	-1.1365	0.0010446	1	gi|326517004|dbj|BAJ96494.1|	326517004	242	3.26e-65	predicted protein [Hordeum vulgare subsp. vulgare]	gi|31712087|gb|AC138001.2|	31712087	2237	0	Oryza sativa chromosome 3 BAC OSJNBa0093M23 genomic sequence, complete sequence	gi|803374902|sp|B8XCH5.1|QKY_ARATH	803374902	139	1.11e-32	RecName: Full=Protein QUIRKY	-	-	-	-	-	-	-	-	-	-	PF00168.30//PF13775.6	C2//DUF4171	--	--	GO:0005544//GO:0005509//GO:0016757	calcium-dependent phospholipid binding//calcium ion binding//transferase activity, transferring glycosyl groups	GO:0016021//GO:0005886	integral component of membrane//plasma membrane
TRINITY_DN49066_c0_g1	50.6961	111.832	-1.1414	0.0036799	1	gi|300837099|gb|ADK38581.1|	300837099	202	3.65e-62	hypothetical protein [Triticum aestivum]	gi|554785862|dbj|AK439459.1|	554785862	143	1.66e-29	Brachypodium distachyon mRNA, clone: PL016C01-A-099_F04	-	-	-	-	-	-	-	-	-	-	-	-	-	-	-	PF04570.14	zf-FLZ	-	-	-	-	-	-
TRINITY_DN54263_c0_g2	32.1027	70.8866	-1.1428	0.0098521	1	gi|326533664|dbj|BAK05363.1|	326533664	829	0	predicted protein [Hordeum vulgare subsp. vulgare]	gi|1435192177|ref|XM_025939722.1|	1435192177	1253	0	PREDICTED: Panicum hallii protein NRT1/ PTR FAMILY 6.3-like (LOC112875756), mRNA	gi|310947331|sp|Q9M331.2|PTR45_ARATH	310947331	270	4.25e-80	RecName: Full=Protein NRT1/ PTR FAMILY 5.7; Short=AtNPF5.7	-	-	-	-	-	-	-	KOG1237	E	H+/oligopeptide symporter	PF00854.21	PTR2	GO:0006857	oligopeptide transport	GO:0005215	transporter activity	GO:0016021	integral component of membrane
TRINITY_DN58104_c0_g1	68.2626	152.11	-1.1559	0.0080403	1	gi|326491261|dbj|BAK05730.1|	326491261	412	1.64e-139	predicted protein, partial [Hordeum vulgare subsp. vulgare]	gi|670403300|ref|XM_008683338.1|	670403300	887	0	PREDICTED: Zea mays Patatin-like protein 6 (LOC100274476), transcript variant X1, mRNA	gi|75163809|sp|Q93ZQ3.1|PLP9_ARATH	75163809	124	1.74e-30	RecName: Full=Probable inactive patatin-like protein 9; Short=AtPLP9; AltName: Full=Patatin-related phospholipase A IIIdelta; Short=pPLAIIId; AltName: Full=Phospholipase A IIIB; Short=AtPLAIIIB	-	-	-	-	-	-	-	KOG0513	I	Ca2+-independent phospholipase A2	PF01734.22	Patatin	GO:0016042	lipid catabolic process	GO:0016787	hydrolase activity	--	--
TRINITY_DN64328_c0_g1	71.5211	159.63	-1.1583	0.00076341	1	gi|326499153|dbj|BAK06067.1|	326499153	640	0	predicted protein [Hordeum vulgare subsp. vulgare]	gi|1435140979|ref|XM_025950881.1|	1435140979	1186	0	PREDICTED: Panicum hallii receptor like protein 29-like (LOC112885234), mRNA	gi|281185491|sp|Q8VZG8.3|Y4885_ARATH	281185491	98.6	7.14e-20	RecName: Full=Probable LRR receptor-like serine/threonine-protein kinase At4g08850; Flags: Precursor	-	-	-	-	-	-	-	KOG0619	R	FOG: Leucine rich repeat	PF13855.6	LRR_8	--	--	--	--	GO:0016023
TRINITY_DN58588_c0_g1	184.414	413.28	-1.1642	0.00027743	0.65647	gi|357142030|ref|XP_003572435.1|	357142030	415	4.69e-139	uncharacterized protein LOC100834517 [Brachypodium distachyon]	gi|1371072534|ref|XM_003572387.3|	1371072534	477	6.11e-130	PREDICTED: Brachypodium distachyon uncharacterized LOC100834517 (LOC100834517), mRNA	gi|75274193|sp|Q9LU90.1|FB188_ARATH	75274193	58.2	9.23e-08	RecName: Full=F-box protein At3g26010	-	-	-	-	-	-	-	-	-	-	PF00646.33	F-box	-	-	-	-	-	-
TRINITY_DN49352_c0_g1	20.3777	45.7162	-1.1657	0.029207	1	gi|326487270|dbj|BAJ89619.1|	326487270	206	2.2e-63	predicted protein [Hordeum vulgare subsp. vulgare]	gi|326497900|dbj|AK363610.1|	326497900	401	1.85e-107	Hordeum vulgare subsp. vulgare mRNA for predicted protein, complete cds, clone: NIASHv2017E20	gi|75311595|sp|Q9LUH8.1|HFA6B_ARATH	75311595	85.1	1.49e-17	RecName: Full=Heat stress transcription factor A-6b; Short=AtHsfA6b; AltName: Full=AtHsf-07	-	-	-	-	-	-	-	KOG0627	K	Heat shock transcription factor	PF00447.17	HSF_DNA-bind	--	--	GO:0003677	DNA binding	--	--
TRINITY_DN54944_c1_g4	18.979	42.6466	-1.168	0.02637	1	gi|474428886|gb|EMS67848.1|	474428886	45.4	1.12e-15	HMG1/2-like protein [Triticum urartu]	gi|1443098149|ref|XM_015795784.2|	1443098149	86.1	1.87e-12	PREDICTED: Oryza sativa Japonica Group HMG1/2-like protein (LOC4347789), transcript variant X1, mRNA	gi|123379|sp|P26585.1|HMGL_SOYBN	123379	49.3	2.84e-06	RecName: Full=HMG1/2-like protein; AltName: Full=Protein SB11	-	-	-	-	-	-	-	KOG0381	R	HMG box-containing protein	PF00505.19	HMG_box	--	--	--	--	GO:0016021	integral component of membrane
TRINITY_DN63640_c2_g1	491.143	1104.3	-1.1689	5.2484e-06	0.043832	gi|326489493|dbj|BAK01727.1|	326489493	268	1.31e-76	predicted protein [Hordeum vulgare subsp. vulgare]	gi|239048016|ref|NM_001138145.2|	239048016	649	0	Zea mays endoglucanase 1 (LOC100192969), mRNA	gi|121784|sp|P05522.1|GUN1_PERAE	121784	167	6.24e-43	RecName: Full=Endoglucanase 1; AltName: Full=Abscission cellulase 1; AltName: Full=Endo-1,4-beta-glucanase 1; Flags: Precursor [Persea americana]	-	-	-	-	-	-	-	-	-	-	PF00759.19	Glyco_hydro_9	GO:0071555//GO:0030245	cell wall organization//cellulose catabolic process	GO:0008810	cellulase activity	GO:0005576	extracellular region
TRINITY_DN59653_c2_g1	34.8724	78.5334	-1.1712	0.005598	1	gi|222617656|gb|EEE53788.1|	222617656	259	5.08e-81	hypothetical protein OsJ_00192 [Oryza sativa Japonica Group]	gi|1435158353|ref|XM_025959908.1|	1435158353	75	7.72e-09	PREDICTED: Panicum hallii putative E3 ubiquitin-protein ligase SINA-like 6 (LOC112892794), mRNA	gi|75171227|sp|Q9FKD5.1|SINL9_ARATH	75171227	75.5	5.67e-14	RecName: Full=Putative E3 ubiquitin-protein ligase SINA-like 9; AltName: Full=Seven in absentia-like protein 9	Environmental Information Processing	Signal transduction	Wnt signaling pathway	ko04310	K04506	E3 ubiquitin-protein ligase SIAH1	2.3.2.27	KOG3002	R	Zn finger protein	PF03145.16	Sina	GO:0043161//GO:0006915	proteasome-mediated ubiquitin-dependent protein catabolic process//apoptotic process	GO:0061630	ubiquitin protein ligase activity	GO:0005737//GO:0042787//GO:0005634	cytoplasm////nucleus
TRINITY_DN62234_c1_g1	19.206	43.5928	-1.1825	0.025631	1	gi|955721917|ref|XP_014661014.1|	955721917	400	4.91e-135	probable long-chain-alcohol O-fatty-acyltransferase 1 [Setaria italica]	gi|937912581|dbj|AP014960.1|	937912581	725	0	Oryza sativa Japonica Group DNA, chromosome 4, cultivar: Nipponbare, complete sequence	gi|122215489|sp|Q3ED15.1|WAXSA_ARATH	122215489	140	1.03e-36	RecName: Full=Putative long-chain-alcohol O-fatty-acyltransferase 10; AltName: Full=Wax synthase 10	-	-	-	-	-	-	-	-	-	-	PF13813.6	MBOAT_2	--	--	GO:0046872//GO:0008374//GO:0016491	metal ion binding//O-acyltransferase activity//oxidoreductase activity	GO:0016021	integral component of membrane
TRINITY_DN65558_c0_g1	107.751	244.667	-1.1831	0.00018069	0.48404	gi|326494972|dbj|BAJ85581.1|	326494972	202	5.83e-133	predicted protein [Hordeum vulgare subsp. vulgare]	gi|573924520|ref|XM_006649761.1|	573924520	444	5.36e-120	PREDICTED: Oryza brachyantha probable protein phosphatase 2C 30 (LOC102707010), mRNA	gi|75264091|sp|Q9LNW3.1|P2C03_ARATH	75264091	142	3.5e-36	RecName: Full=Protein phosphatase 2C 3; Short=AtPP2C03; AltName: Full=Protein AKT1-INTERACTING 1; AltName: Full=Protein phosphatase 2C AIP1; Short=PP2C AIP1	Environmental Information Processing	Signal transduction	Plant hormone signal transduction	ko04075	K14497	protein phosphatase 2C	3.1.3.16	KOG0698	T	Serine/threonine protein phosphatase	PF00481.21	PP2C	GO:0006470	protein dephosphorylation	GO:0046872//GO:0004722	metal ion binding//protein serine/threonine phosphatase activity	GO:0009536	plastid
TRINITY_DN52772_c0_g1	56.9539	130.611	-1.1974	0.036975	1	gi|326518556|dbj|BAJ88307.1|	326518556	517	0	predicted protein [Hordeum vulgare subsp. vulgare]	gi|1205931977|ref|XM_002460645.2|	1205931977	961	0	PREDICTED: Sorghum bicolor xyloglucan endotransglucosylase/hydrolase protein 31 (LOC8077428), mRNA	gi|38605497|sp|Q9LJR7.1|XTH3_ARATH	38605497	186	1.78e-54	RecName: Full=Xyloglucan endotransglucosylase/hydrolase protein 3; Short=At-XTH3; Short=XTH-3; Flags: Precursor	--	--	--	--	K08235	xyloglucan:xyloglucosyl transferase	2.4.1.207	-	-	-	PF00722.21//PF06955.12	Glyco_hydro_16//XET_C	GO:0071555//GO:0010411//GO:0042546	cell wall organization//xyloglucan metabolic process//cell wall biogenesis	GO:0004553//GO:0016762	hydrolase activity, hydrolyzing O-glycosyl compounds//xyloglucan:xyloglucosyl transferase activity	GO:0005618//GO:0048046//GO:0016023	cell wall//apoplast//
TRINITY_DN47717_c1_g3	17.9276	41.2276	-1.2014	0.048902	1	gi|533310148|ref|YP_008474342.1|	533310148	234	3.78e-158	hypothetical chloroplast RF21 (chloroplast) [Aegilops tauschii]	gi|1381393493|ref|NC_037497.1|	1381393493	1574	0	Littledalea przevalskyi chloroplast, complete genome	gi|122164385|sp|Q06GT4.1|YCF2_DRIGR	122164385	133	2.65e-30	RecName: Full=Protein Ycf2	-	-	-	-	-	-	-	-	-	-	PF08270.11//PF10705.9	PRD_Mga//Ycf15	--	--	GO:0000166	nucleotide binding	GO:0016021//GO:0009507	integral component of membrane//chloroplast
TRINITY_DN58489_c0_g1	22.7153	52.462	-1.2076	0.017491	1	gi|1002310570|ref|XP_015618644.1|	1002310570	144	4.9e-41	uncharacterized protein LOC4351830 [Oryza sativa Japonica Group]	gi|1189419125|gb|CP018167.1|	1189419125	230	6.4e-56	Oryza sativa Indica Group cultivar Shuhui498 chromosome 11 sequence	-	-	-	-	-	-	-	-	-	-	-	-	KOG4197	R	FOG: PPR repeat	PF07939.11	DUF1685	--	--	--	--	GO:0009536	plastid
TRINITY_DN51038_c0_g2	75.7819	175.369	-1.2105	0.00036975	0.78352	gi|300681441|emb|CBH32533.1|	300681441	379	0	acyl-desaturase, chloroplast precursor,putative,expressed [Triticum aestivum]	gi|937906879|dbj|AP014959.1|	937906879	479	1.69e-130	Oryza sativa Japonica Group DNA, chromosome 3, cultivar: Nipponbare, complete sequence	gi|3915035|sp|Q96456.1|STAD_HELAN	3915035	170	3.62e-106	RecName: Full=Stearoyl-[acyl-carrier-protein] 9-desaturase, chloroplastic; Short=Stearoyl-ACP desaturase; AltName: Full=Acyl-[acyl-carrier-protein] desaturase; Flags: Precursor	Metabolism	Global and overview maps	Fatty acid metabolism	ko01212	K03921	acyl-[acyl-carrier-protein] desaturase	1.14.19.2	-	-	-	PF03405.14	FA_desaturase_2	GO:0006633//GO:0055114	fatty acid biosynthetic process//oxidation-reduction process	GO:0046872//GO:0045300	metal ion binding//acyl-[acyl-carrier-protein] desaturase activity	GO:0009507	chloroplast
TRINITY_DN65000_c2_g4	15.423	35.784	-1.2142	0.040089	1	gi|474377017|gb|EMS64247.1|	474377017	125	1.22e-34	Histone H2B.3 [Triticum urartu]	gi|195606695|gb|EU953060.1|	195606695	122	3.92e-24	Zea mays clone 1379435 histone H2B.2 mRNA, complete cds	gi|81866316|sp|Q8CGP1.3|H2B1K_MOUSE	81866316	92.8	4.35e-25	RecName: Full=Histone H2B type 1-K	-	-	-	-	-	-	-	KOG1744	B	Histone H2B	PF00125.24//PF17863.1	Histone//AAA_lid_2	GO:0006334	nucleosome assembly	GO:0003677//GO:0046982	DNA binding//protein heterodimerization activity	GO:0000788	nuclear nucleosome
TRINITY_DN44384_c0_g1	29.7064	69.135	-1.2186	0.007956	1	gi|1002309787|ref|XP_015618264.1|	1002309787	375	0	tryptamine 5-hydroxylase [Oryza sativa Japonica Group]	gi|1371090184|ref|XM_003578676.4|	1371090184	1288	0	PREDICTED: Brachypodium distachyon cytochrome P450 71A1 (LOC100841584), mRNA	gi|476007202|sp|F8S1I0.1|C7BL2_LACSA	476007202	120	2.89e-90	RecName: Full=Costunolide synthase; Short=LsCOS; AltName: Full=Cytochrome P450 71BL2 [Lactuca sativa]	-	-	-	-	-	-	-	KOG0156	Q	Cytochrome P450 CYP2 subfamily	PF00067.22	p450	GO:0044550//GO:0055114	secondary metabolite biosynthetic process//oxidation-reduction process	GO:0005506//GO:0016709//GO:0020037	iron ion binding//oxidoreductase activity, acting on paired donors, with incorporation or reduction of molecular oxygen, NAD(P)H as one donor, and incorporation of one atom of oxygen//heme binding	GO:0016021//GO:0005739	integral component of membrane//mitochondrion
TRINITY_DN50496_c1_g2	32.014	74.9896	-1.228	0.0057957	1	gi|326506710|dbj|BAJ91396.1|	326506710	186	1.74e-54	predicted protein [Hordeum vulgare subsp. vulgare]	gi|326506709|dbj|AK360187.1|	326506709	610	2.44e-170	Hordeum vulgare subsp. vulgare mRNA for predicted protein, complete cds, clone: NIASHv1112H06	gi|75213637|sp|Q9SZN7.1|HIP26_ARATH	75213637	47.8	8.75e-06	RecName: Full=Heavy metal-associated isoprenylated plant protein 26; Short=AtHIPP26; AltName: Full=Farnesylated protein 6; Short=AtFP6; Flags: Precursor	-	-	-	-	-	-	-	KOG1603	P	Copper chaperone	PF00403.26	HMA	GO:0046916//GO:0030001	cellular transition metal ion homeostasis//metal ion transport	GO:0046914	transition metal ion binding	GO:0005737	cytoplasm
TRINITY_DN45060_c0_g1	13.3734	31.6561	-1.2431	0.04461	1	gi|599153226|gb|EYE92539.1|	599153226	346	3.22e-120	hypothetical protein EURHEDRAFT_380024 [Aspergillus ruber CBS 135680]	gi|1066275712|ref|XM_018177627.1|	1066275712	124	4.07e-24	Paraphaeosphaeria sporulosa hypothetical protein mRNA	-	-	-	-	-	-	-	-	-	-	-	-	-	-	-	-	-	-	-	-	-	-	-
TRINITY_DN59163_c2_g6	12.4727	29.5402	-1.2439	0.048419	1	gi|51039052|gb|AAT94291.1|	51039052	337	1.86e-115	alpha-expansin EXPA1 [Triticum aestivum]	gi|1443071938|ref|XM_015778707.2|	1443071938	616	5.14e-172	PREDICTED: Oryza sativa Japonica Group expansin-A1-like (LOC4335222), mRNA	gi|115502182|sp|Q4PR43.2|EXP23_ORYSJ	115502182	231	4.63e-75	RecName: Full=Expansin-A23; AltName: Full=Alpha-expansin-23; AltName: Full=OsEXP23; AltName: Full=OsEXPA23; AltName: Full=OsaEXPa1.12; Flags: Precursor	-	-	-	-	-	-	-	-	-	-	PF03330.18//PF01357.21	DPBB_1//Pollen_allerg_1	GO:0009664	plant-type cell wall organization	--	--	GO:0005576//GO:0016020//GO:0016023//GO:0005618	extracellular region//membrane////cell wall
TRINITY_DN49473_c3_g3	25.7934	61.421	-1.2517	0.010132	1	gi|326501460|dbj|BAK02519.1|	326501460	302	1.46e-100	predicted protein, partial [Hordeum vulgare subsp. vulgare]	gi|1256579821|ref|XM_004973621.4|	1256579821	595	6.63e-166	PREDICTED: Setaria italica tuliposide A-converting enzyme 1, chloroplastic (LOC101770880), mRNA	gi|75337806|sp|Q9SX78.1|CXE2_ARATH	75337806	130	3.96e-35	RecName: Full=Probable carboxylesterase 2; AltName: Full=AtCXE2	-	-	-	-	-	-	-	KOG1515	V	Arylacetamide deacetylase	PF07859.13	Abhydrolase_3	GO:0008152	metabolic process	GO:0016787	hydrolase activity	--	--
TRINITY_DN55322_c0_g2	19.631	46.7765	-1.2526	0.016006	1	gi|669027349|emb|CDM80682.1|	669027349	96.3	2.21e-21	unnamed protein product [Triticum aestivum]	gi|554785205|dbj|AK438716.1|	554785205	185	2.41e-42	Brachypodium distachyon mRNA, clone: PL016C01-A-094_J06	-	-	-	-	-	-	-	-	-	-	-	-	-	-	-	-	-	-	-	-	-	-	-
TRINITY_DN60025_c0_g1	32.9353	79.3902	-1.2693	0.041531	1	gi|326505652|dbj|BAJ95497.1|	326505652	1201	0	predicted protein, partial [Hordeum vulgare subsp. vulgare]	gi|49389035|dbj|AP005838.3|	49389035	1478	0	Oryza sativa Japonica Group genomic DNA, chromosome 9, BAC clone:OSJNBa0041C07	gi|158513713|sp|A2ZLU6.2|SL11_ORYSI	158513713	172	1.45e-43	RecName: Full=Protein spotted leaf 11; AltName: Full=Cell death-related protein SPL11	-	-	-	-	-	-	-	KOG0167	S	FOG: Armadillo/beta-catenin-like repeats	PF12804.7//PF04564.15//PF00514.23//PF10524.9	NTP_transf_3//U-box//Arm//NfI_DNAbd_pre-N	GO:0016567	protein ubiquitination	GO:0016874//GO:0004842	ligase activity//ubiquitin-protein transferase activity	--	--
TRINITY_DN55848_c1_g2	24.2054	58.6207	-1.2761	0.024971	1	gi|944083187|gb|KQK18539.1|	944083187	310	1.11e-103	hypothetical protein BRADI_1g43170v3 [Brachypodium distachyon]	gi|1435148484|ref|XM_025954782.1|	1435148484	592	8.77e-165	PREDICTED: Panicum hallii very-long-chain 3-oxoacyl-CoA reductase 1-like (LOC112888553), transcript variant X2, mRNA	gi|3913470|sp|O57314.1|DHB12_ANAPL	3913470	141	1.64e-39	RecName: Full=Very-long-chain 3-oxoacyl-CoA reductase; AltName: Full=17-beta-hydroxysteroid dehydrogenase 12; Short=17-beta-HSD 12; AltName: Full=3-ketoacyl-CoA reductase; Short=KAR; AltName: Full=Estradiol 17-beta-dehydrogenase 12 [Anas platyrhynchos]	-	-	-	-	-	-	-	-	-	-	PF00106.25	adh_short	GO:0055114	oxidation-reduction process	GO:0016491	oxidoreductase activity	GO:0016021	integral component of membrane
TRINITY_DN46903_c0_g1	16.2829	39.6659	-1.2845	0.028054	1	gi|242058693|ref|XP_002458492.1|	242058693	512	4.41e-178	receptor-like protein 51 [Sorghum bicolor]	gi|299109310|emb|FN564426.1|	299109310	1110	0	Triticum aestivum chromosome 3B-specific BAC library, contig ctg0005b	gi|263432299|sp|Q9FIZ3.2|GSO2_ARATH	263432299	67	2.11e-10	RecName: Full=LRR receptor-like serine/threonine-protein kinase GSO2; AltName: Full=Protein EMBRYO SAC DEVELOPMENT ARREST 23; AltName: Full=Protein GASSHO 2; Flags: Precursor	-	-	-	-	-	-	-	KOG0619	R	FOG: Leucine rich repeat	PF13855.6	LRR_8	--	--	--	--	GO:0016021//GO:0009536	integral component of membrane//plastid
TRINITY_DN61553_c0_g5	33.9733	82.9746	-1.2883	0.01071	1	gi|326506198|dbj|BAJ86417.1|	326506198	242	2.81e-73	predicted protein [Hordeum vulgare subsp. vulgare]	gi|1371059253|ref|XM_024458223.1|	1371059253	494	2.99e-135	PREDICTED: Brachypodium distachyon protein NRT1/ PTR FAMILY 3.1 (LOC100842028), transcript variant X2, mRNA	gi|75335666|sp|Q9LYR6.1|PTR49_ARATH	75335666	85.9	1.36e-17	RecName: Full=Protein NRT1/ PTR FAMILY 6.1; Short=AtNPF6.1	-	-	-	-	-	-	-	KOG1237	E	H+/oligopeptide symporter	PF00854.21	PTR2	GO:0006810	transport	GO:0005215	transporter activity	GO:0016021	integral component of membrane
TRINITY_DN59216_c1_g2	366.11	907.394	-1.3095	8.3082e-06	0.059263	gi|669028991|emb|CDM83000.1|	669028991	334	1.41e-109	unnamed protein product [Triticum aestivum]	gi|1149823725|ref|XR_002230991.1|	1149823725	99	5.13e-16	PREDICTED: Aegilops tauschii subsp. tauschii uncharacterized LOC109755457 (LOC109755457), transcript variant X1, ncRNA	-	-	-	-	-	-	-	-	-	-	-	-	-	-	-	-	-	-	-	-	-	-	-
TRINITY_DN45432_c0_g1	17.8944	44.4577	-1.3129	0.04072	1	gi|326491941|dbj|BAJ98195.1|	326491941	892	0	predicted protein [Hordeum vulgare subsp. vulgare]	gi|1443089923|ref|XM_015789566.2|	1443089923	119	4.7e-22	PREDICTED: Oryza sativa Japonica Group putative pentatricopeptide repeat-containing protein At1g26500 (LOC4343809), transcript variant X2, mRNA	gi|122223754|sp|Q0WPZ6.1|PP158_ARATH	122223754	58.5	1.35e-07	RecName: Full=Pentatricopeptide repeat-containing protein At2g17140	-	-	-	-	-	-	-	KOG4197	R	FOG: PPR repeat	PF13041.6	PPR_2	--	--	GO:0043531	ADP binding	--	--
TRINITY_DN65761_c2_g3	42.0801	105.071	-1.3202	0.00071208	1	gi|474387922|gb|EMS65108.1|	474387922	381	9.8e-129	hypothetical protein TRIUR3_18790 [Triticum urartu]	gi|109287735|dbj|AB262980.1|	109287735	811	0	Oryza sativa Japonica Group SLR1 gene for DELLA protein, complete cds	gi|75104298|sp|Q5BN23.1|RGA1_BRACM	75104298	268	4.04e-84	RecName: Full=DELLA protein RGA1; AltName: Full=BrRGA1; AltName: Full=RGA-like protein 1	-	-	-	-	-	-	-	-	-	-	PF03514.14	GRAS	GO:0006355//GO:0009740	regulation of transcription, DNA-templated//gibberellic acid mediated signaling pathway	GO:0000989	obsolete transcription factor activity, transcription factor binding	GO:0005634	nucleus
TRINITY_DN39043_c0_g1	128.447	323.037	-1.3305	5.1291e-05	0.21091	gi|1002295733|ref|XP_015611325.1|	1002295733	85.1	1.27e-14	uncharacterized protein LOC107276297 isoform X2 [Oryza sativa Japonica Group]	-	-	-	-	-	-	-	-	-	-	-	-	-	-	-	-	-	-	-	-	PF14551.6//PF01213.19	MCM_N//CAP_N	-	-	-	-	-	-
TRINITY_DN62490_c2_g1	21.1094	53.0875	-1.3305	0.030237	1	gi|357134001|ref|XP_003568608.1|	357134001	84	2.47e-16	probable ribosome biogenesis protein RLP24 [Brachypodium distachyon]	gi|50509540|dbj|AP005258.4|	50509540	130	2.02e-25	Oryza sativa Japonica Group genomic DNA, chromosome 7, PAC clone:P0446G09	gi|52783286|sp|Q6CF69.1|RLP24_YARLI	52783286	66.6	1.61e-11	RecName: Full=Ribosome biogenesis protein RLP24	Genetic Information Processing	Translation	Ribosome	ko03010	K02896	large subunit ribosomal protein L24e	--	KOG1723	J	60s ribosomal protein L30 isolog	PF04517.12//PF01246.20	Microvir_lysis//Ribosomal_L24e	GO:1902626//GO:0006412//GO:0000027	assembly of large subunit precursor of preribosome//translation//ribosomal large subunit assembly	GO:0003735	structural constituent of ribosome	GO:0022625	cytosolic large ribosomal subunit
TRINITY_DN60775_c2_g1	12.7753	32.1539	-1.3316	0.032357	1	gi|326500510|dbj|BAK06344.1|	326500510	68.6	1.14e-10	predicted protein [Hordeum vulgare subsp. vulgare]	gi|1149748946|ref|XM_020341576.1|	1149748946	313	7.59e-81	PREDICTED: Aegilops tauschii subsp. tauschii uncharacterized LOC109782942 (LOC109782942), transcript variant X1, mRNA	-	-	-	-	-	-	-	-	-	-	-	-	-	-	-	-	-	-	-	-	-	-	-
TRINITY_DN47155_c0_g1	11.1116	27.9824	-1.3325	0.042868	1	gi|326517848|dbj|BAK03842.1|	326517848	738	0	predicted protein [Hordeum vulgare subsp. vulgare]	gi|937920774|dbj|AP014962.1|	937920774	433	1.24e-116	Oryza sativa Japonica Group DNA, chromosome 6, cultivar: Nipponbare, complete sequence	gi|75163931|sp|Q940Q8.1|IX10L_ARATH	75163931	106	1.35e-23	RecName: Full=Probable beta-1,4-xylosyltransferase IRX10L; AltName: Full=Glucuronoxylan glucuronosyltransferase 1; Short=AtGUT1; AltName: Full=Glucuronoxylan glucuronosyltransferase 2; Short=AtGUT2; AltName: Full=Protein IRREGULAR XYLEM 10-like; AltName: Full=Xylan xylosyltransferase IRX10L	-	-	-	-	-	-	-	KOG1021	GMW	Acetylglucosaminyltransferase EXT1/exostosin 1	PF03016.15	Exostosin	--	--	GO:0016757	transferase activity, transferring glycosyl groups	GO:0016020//GO:0016023	membrane//
TRINITY_DN64941_c0_g2	46.298	116.657	-1.3333	0.00047552	0.89262	gi|166863537|gb|ABZ01581.1|	166863537	822	0	cellulose synthase-like CslF9 [Hordeum vulgare]	gi|1149806170|ref|XM_020307285.1|	1149806170	1234	0	PREDICTED: Aegilops tauschii subsp. tauschii probable mixed-linked glucan synthase 8 (LOC109748246), mRNA	gi|75174372|sp|Q9LHZ7.1|CSLD2_ORYSJ	75174372	369	3.17e-115	RecName: Full=Cellulose synthase-like protein D2; AltName: Full=OsCslD2	-	-	-	-	-	-	-	-	-	-	PF03552.14	Cellulose_synt	GO:0071555//GO:0030244	cell wall organization//cellulose biosynthetic process	GO:0016760	cellulose synthase (UDP-forming) activity	GO:0016021	integral component of membrane
TRINITY_DN40108_c1_g1	10.8444	27.3611	-1.3352	0.046643	1	gi|326507674|dbj|BAK03230.1|	326507674	603	0	predicted protein, partial [Hordeum vulgare subsp. vulgare]	gi|1443099304|ref|XM_015757099.2|	1443099304	422	2.16e-113	PREDICTED: Oryza sativa Japonica Group flavanone 3-dioxygenase 3-like (LOC4347916), mRNA	gi|729505|sp|Q06942.1|FL3H_MALDO	729505	157	8.79e-43	RecName: Full=Naringenin,2-oxoglutarate 3-dioxygenase; AltName: Full=FHT; AltName: Full=Flavanone-3-hydroxylase; Short=F3H [Malus domestica]	-	-	-	-	-	-	-	KOG0143	QR	Iron/ascorbate family oxidoreductases	PF14226.6//PF03171.20	DIOX_N//2OG-FeII_Oxy	GO:0055114	oxidation-reduction process	GO:0051213//GO:0005506	dioxygenase activity//iron ion binding	--	--
TRINITY_DN51082_c0_g3	34.6189	88.1141	-1.3478	0.022331	1	gi|326515744|dbj|BAK07118.1|	326515744	97.1	3.16e-21	predicted protein [Hordeum vulgare subsp. vulgare]	gi|195595626|gb|EU943272.1|	195595626	115	3.3e-21	Zea mays clone 1590751 mRNA sequence	-	-	-	-	-	-	-	-	-	-	-	-	-	-	-	-	-	-	-	-	-	-	-
TRINITY_DN48291_c0_g1	93.5319	242.628	-1.3752	0.00023684	0.58991	gi|116309335|emb|CAH66419.1|	116309335	374	9.16e-126	H0622F05.2 [Oryza sativa]	gi|1435176564|ref|XM_025969171.1|	1435176564	780	0	PREDICTED: Panicum hallii probable F-box protein At2g36090 (LOC112900347), mRNA	gi|122209417|sp|Q2V3R1.1|FB346_ARATH	122209417	123	5.33e-30	RecName: Full=F-box protein At3g44326	-	-	-	-	-	-	-	-	-	-	-	-	--	--	--	--	GO:0016021	integral component of membrane
TRINITY_DN52846_c2_g1	12.34	32.1291	-1.3805	0.032418	1	gi|326511978|dbj|BAJ95970.1|	326511978	114	1.35e-25	predicted protein [Hordeum vulgare subsp. vulgare]	gi|1149707236|ref|XR_002233388.1|	1149707236	303	5.91e-78	PREDICTED: Aegilops tauschii subsp. tauschii uncharacterized LOC109765344 (LOC109765344), transcript variant X2, ncRNA	gi|254763431|sp|O00203.3|AP3B1_HUMAN	254763431	52	4.29e-06	RecName: Full=AP-3 complex subunit beta-1; AltName: Full=Adaptor protein complex AP-3 subunit beta-1; AltName: Full=Adaptor-related protein complex 3 subunit beta-1; AltName: Full=Beta-3A-adaptin; AltName: Full=Clathrin assembly protein complex 3 beta-1 large chain	Cellular Processes	Transport and catabolism	Lysosome	ko04142	K12397	AP-3 complex subunit beta	--	KOG1060	U	Vesicle coat complex AP-3, beta subunit	-	-	GO:0015031	protein transport	--	--	GO:0030117	membrane coat
TRINITY_DN52901_c1_g1	23.9152	62.6936	-1.3904	0.0038492	1	gi|357111425|ref|XP_003557514.1|	357111425	258	2.48e-79	L10-interacting MYB domain-containing protein [Brachypodium distachyon]	gi|1149769802|ref|XM_020293758.1|	1149769802	167	1.6e-36	PREDICTED: Aegilops tauschii subsp. tauschii uncharacterized LOC109734551 (LOC109734551), mRNA	gi|75252736|sp|Q5Z5Q3.1|C3H43_ORYSJ	75252736	65.5	7.88e-10	RecName: Full=Zinc finger CCCH domain-containing protein 43; Short=OsC3H43	-	-	-	-	-	-	-	-	-	-	-	-	GO:0016310	phosphorylation	GO:0004672//GO:0000166	protein kinase activity//nucleotide binding	--	--
TRINITY_DN46305_c0_g1	8.51615	22.6771	-1.413	0.048966	1	gi|1002850825|ref|XP_015691325.1|	1002850825	64.3	8.67e-11	PREDICTED: protein LITTLE ZIPPER 3-like [Oryza brachyantha]	gi|1205951679|ref|XM_002452153.2|	1205951679	189	1.49e-43	PREDICTED: Sorghum bicolor protein LITTLE ZIPPER 4 (LOC8058638), transcript variant X2, mRNA	gi|75180869|sp|Q9LXI8.1|ZPR3_ARATH	75180869	51.6	8.03e-08	RecName: Full=Protein LITTLE ZIPPER 3	-	-	-	-	-	-	-	-	-	-	-	-	GO:0010075//GO:0010358//GO:0010305//GO:0009943//GO:0043433	regulation of meristem growth//leaf shaping//leaf vascular tissue pattern formation//adaxial/abaxial axis specification//negative regulation of DNA-binding transcription factor activity	--	--	GO:0005634	nucleus
TRINITY_DN51954_c0_g1	32.7085	87.2473	-1.4154	0.00092096	1	gi|326516578|dbj|BAJ92444.1|	326516578	865	0	predicted protein, partial [Hordeum vulgare subsp. vulgare]	gi|932283343|gb|CP012618.1|	932283343	1483	0	Oryza sativa Indica Group cultivar RP Bio-226 chromosome 10 sequence	gi|28558099|sp|Q9M6E2.1|DBAT_TAXCU	28558099	179	5.67e-49	RecName: Full=10-deacetylbaccatin III 10-O-acetyltransferase; Short=DBAT [Taxus cuspidata]	-	-	-	-	-	-	-	-	-	-	PF02458.15	Transferase	--	--	GO:0016747	transferase activity, transferring acyl groups other than amino-acyl groups	--	--
TRINITY_DN54819_c0_g1	9.85004	26.3683	-1.4206	0.042226	1	gi|326494282|dbj|BAJ90410.1|	326494282	375	9.95e-130	predicted protein [Hordeum vulgare subsp. vulgare]	gi|326520771|dbj|AK361545.1|	326520771	521	1.2e-143	Hordeum vulgare subsp. vulgare mRNA for predicted protein, complete cds, clone: NIASHv1143G06	gi|1175013|sp|P43286.1|PIP21_ARATH	1175013	281	3.19e-94	RecName: Full=Aquaporin PIP2-1; AltName: Full=Plasma membrane intrinsic protein 2-1; Short=AtPIP2;1; AltName: Full=Plasma membrane intrinsic protein 2a; Short=PIP2a; Contains: RecName: Full=Aquaporin PIP2-1, N-terminally processed	-	-	-	-	-	-	-	KOG0223	G	Aquaporin (major intrinsic protein family)	PF00230.20	MIP	GO:0009992//GO:0006833//GO:0015793//GO:0034220	cellular water homeostasis//water transport//glycerol transport//ion transmembrane transport	GO:0015254//GO:0015250	glycerol channel activity//water channel activity	GO:0009506//GO:0005887//GO:0005773	plasmodesma//integral component of plasma membrane//vacuole
TRINITY_DN61139_c1_g1	126.465	338.85	-1.4219	2.9155e-06	0.029566	gi|326518939|dbj|BAJ92630.1|	326518939	68.9	3.14e-34	predicted protein [Hordeum vulgare subsp. vulgare]	gi|1205989212|ref|XM_021450271.1|	1205989212	124	5.2e-24	PREDICTED: Sorghum bicolor ice-structuring glycoprotein (LOC8065012), mRNA	-	-	-	-	-	-	-	-	-	-	-	-	-	-	-	PF03087.14	DUF241	-	-	-	-	-	-
TRINITY_DN58490_c0_g1	14.1442	38.2367	-1.4347	0.016275	1	gi|326521400|dbj|BAJ96903.1|	326521400	179	3.06e-52	predicted protein, partial [Hordeum vulgare subsp. vulgare]	gi|1149810214|ref|XM_020308840.1|	1149810214	278	2.73e-70	PREDICTED: Aegilops tauschii subsp. tauschii cytochrome P450 71A1-like (LOC109749900), mRNA	gi|5915839|sp|O48923.1|C71DA_SOYBN	5915839	104	1.04e-24	RecName: Full=Cytochrome P450 71D10	-	-	-	-	-	-	-	KOG0156	Q	Cytochrome P450 CYP2 subfamily	PF03833.13//PF08521.10//PF00067.22	PolC_DP2//2CSK_N//p450	GO:0044550//GO:0055114	secondary metabolite biosynthetic process//oxidation-reduction process	GO:0005506//GO:0016709//GO:0020037	iron ion binding//oxidoreductase activity, acting on paired donors, with incorporation or reduction of molecular oxygen, NAD(P)H as one donor, and incorporation of one atom of oxygen//heme binding	GO:0016021//GO:0016023	integral component of membrane//
TRINITY_DN61968_c2_g1	1208.38	3277.92	-1.4397	0.00096145	1	gi|326498489|dbj|BAJ98672.1|	326498489	545	0	predicted protein, partial [Hordeum vulgare subsp. vulgare]	gi|932283291|gb|CP012617.1|	932283291	789	0	Oryza sativa Indica Group cultivar RP Bio-226 chromosome 9 sequence	gi|75288846|sp|Q65XK7.1|P2C51_ORYSJ	75288846	240	2.09e-73	RecName: Full=Probable protein phosphatase 2C 51; Short=OsPP2C51	-	-	-	-	-	-	-	KOG0698	T	Serine/threonine protein phosphatase	PF00481.21	PP2C	GO:0006470	protein dephosphorylation	GO:0046872//GO:0004722	metal ion binding//protein serine/threonine phosphatase activity	--	--
TRINITY_DN61968_c2_g4	15.7946	43.6322	-1.466	0.0074303	1	gi|474223889|gb|EMS59347.1|	474223889	53.5	4.42e-06	putative protein phosphatase 2C 30 [Triticum urartu]	gi|666937425|gb|KJ855122.1|	666937425	202	1.3e-47	Zea mays 2C-type protein phosphatase protein (PP2C14) mRNA, complete cds	-	-	-	-	-	-	-	-	-	-	-	-	-	-	-	-	-	-	-	-	-	-	-
TRINITY_DN59418_c3_g2	9.1638	25.6036	-1.4823	0.040288	1	gi|326507902|dbj|BAJ86694.1|	326507902	234	1.36e-71	predicted protein [Hordeum vulgare subsp. vulgare]	gi|326514291|dbj|AK364930.1|	326514291	399	6.09e-107	Hordeum vulgare subsp. vulgare mRNA for predicted protein, complete cds, clone: NIASHv2029I22	gi|313118200|sp|C0SJS4.1|C71AJ_APIGR	313118200	128	3.9e-33	RecName: Full=Psoralen synthase; AltName: Full=Cytochrome P450 CYP71AJ2, partial [Apium graveolens]	-	-	-	-	-	-	-	KOG0156	Q	Cytochrome P450 CYP2 subfamily	PF00067.22	p450	GO:0044550//GO:0055114	secondary metabolite biosynthetic process//oxidation-reduction process	GO:0016709//GO:0020037//GO:0005506	oxidoreductase activity, acting on paired donors, with incorporation or reduction of molecular oxygen, NAD(P)H as one donor, and incorporation of one atom of oxygen//heme binding//iron ion binding	GO:0016021	integral component of membrane
TRINITY_DN49179_c4_g1	48.8943	137.204	-1.4886	5.1993e-05	0.21091	gi|987312900|gb|AMD78108.1|	987312900	168	2.41e-48	heat-responsive transcription factor HSF85 [Triticum aestivum]	gi|1149804070|ref|XM_020306475.1|	1149804070	196	9.65e-46	PREDICTED: Aegilops tauschii subsp. tauschii heat stress transcription factor C-2a-like (LOC109747410), mRNA	gi|122168126|sp|Q0DBL6.1|HFC2B_ORYSJ	122168126	65.5	3.61e-11	RecName: Full=Heat stress transcription factor C-2b; AltName: Full=Heat stress transcription factor 16; Short=OsHsf-16	-	-	-	-	-	-	-	-	-	-	-	-	GO:0006355	regulation of transcription, DNA-templated	GO:0043565//GO:0003700	sequence-specific DNA binding//DNA-binding transcription factor activity	GO:0005634	nucleus
TRINITY_DN49280_c2_g7	14.0195	39.3671	-1.4896	0.0088026	1	gi|326510259|dbj|BAJ87346.1|	326510259	398	8.85e-136	predicted protein, partial [Hordeum vulgare subsp. vulgare]	gi|326500177|dbj|AK363757.1|	326500177	490	3.35e-134	Hordeum vulgare subsp. vulgare mRNA for predicted protein, complete cds, clone: NIASHv2018K18	gi|75292642|sp|Q6VAB0.1|U85C2_STERE	75292642	172	1.43e-49	RecName: Full=UDP-glycosyltransferase 85C2	-	-	-	-	-	-	-	KOG1192	GC	UDP-glucuronosyl and UDP-glucosyl transferase	-	-	GO:0009813//GO:0052696	flavonoid biosynthetic process//flavonoid glucuronidation	GO:0080043//GO:0080044	quercetin 3-O-glucosyltransferase activity//quercetin 7-O-glucosyltransferase activity	GO:0043231	intracellular membrane-bounded organelle
TRINITY_DN54412_c5_g2	220.831	620.786	-1.4912	0.034294	1	gi|573951165|ref|XP_006657869.1|	573951165	116	1.11e-28	PREDICTED: uncharacterized protein LOC102711166 [Oryza brachyantha]	gi|1443041661|ref|XM_015787147.2|	1443041661	147	2.13e-30	PREDICTED: Oryza sativa Japonica Group uncharacterized LOC9270584 (LOC9270584), mRNA	-	-	-	-	-	-	-	-	-	-	-	-	-	-	-	-	-	--	--	--	--	GO:0005739	mitochondrion
TRINITY_DN58347_c0_g2	8.53302	24.0261	-1.4935	0.045626	1	gi|326507464|dbj|BAK03125.1|	326507464	67.8	3.59e-11	predicted protein [Hordeum vulgare subsp. vulgare]	-	-	-	-	-	-	-	-	-	-	-	-	-	-	-	-	-	-	-	-	-	-	GO:0055114	oxidation-reduction process	GO:0050660//GO:0004499//GO:0050661	flavin adenine dinucleotide binding//N,N-dimethylaniline monooxygenase activity//NADP binding	--	--
TRINITY_DN62301_c3_g3	10.0624	28.3985	-1.4968	0.022952	1	gi|118748148|gb|ABL11233.1|	118748148	276	6.58e-91	UCW116, putative lipase [Hordeum vulgare subsp. vulgare]	gi|1256471031|ref|XM_004964743.4|	1256471031	518	1.2e-142	PREDICTED: Setaria italica GDSL esterase/lipase At5g45910 (LOC101767983), mRNA	gi|75216243|sp|Q9ZQI3.1|GDL40_ARATH	75216243	93.2	2.3e-21	RecName: Full=GDSL esterase/lipase At2g27360; AltName: Full=Extracellular lipase At2g27360; Flags: Precursor	-	-	-	-	-	-	-	-	-	-	-	-	--	--	GO:0016788	hydrolase activity, acting on ester bonds	GO:0016023
TRINITY_DN60078_c0_g1	10.4085	29.5844	-1.5071	0.026711	1	gi|326491121|dbj|BAK05660.1|	326491121	107	2.28e-25	predicted protein, partial [Hordeum vulgare subsp. vulgare]	gi|326511292|dbj|AK356443.1|	326511292	344	4.21e-90	Hordeum vulgare subsp. vulgare mRNA for predicted protein, partial cds, clone: NIASHv1034N10	-	-	-	-	-	-	-	-	-	-	-	-	-	-	-	-	-	--	--	--	--	GO:0016020	membrane
TRINITY_DN48092_c4_g1	15.0639	43.0843	-1.5161	0.016471	1	gi|116205351|ref|XP_001228486.1|	116205351	321	6.22e-108	hypothetical protein CHGG_10559 [Chaetomium globosum CBS 148.51]	gi|1494847053|emb|LR026966.1|	1494847053	135	2.71e-27	Podospora comata strain T genome assembly, chromosome: 3	gi|292495277|sp|A1DJ52.1|XYNA_NEOFI	292495277	191	4.67e-58	RecName: Full=Probable endo-1,4-beta-xylanase A; Short=Xylanase A; AltName: Full=1,4-beta-D-xylan xylanohydrolase A; Flags: Precursor	--	--	--	--	K01181	endo-1,4-beta-xylanase	3.2.1.8	-	-	-	PF00457.17	Glyco_hydro_11	GO:0045493	xylan catabolic process	GO:0030248//GO:0031176	cellulose binding//endo-1,4-beta-xylanase activity	GO:0005576	extracellular region
TRINITY_DN46937_c0_g1	11.1633	32.3148	-1.5334	0.01727	1	gi|514719321|ref|XP_004954208.1|	514719321	607	0	anthocyanin 5-aromatic acyltransferase [Setaria italica]	gi|1205950725|ref|XM_002454652.2|	1205950725	909	0	PREDICTED: Sorghum bicolor anthocyanin 5-aromatic acyltransferase (LOC8081981), mRNA	gi|75273807|sp|Q9LRQ7.1|BAHD2_ARATH	75273807	140	5.28e-35	RecName: Full=BAHD acyltransferase At3g29680; AltName: Full=Probable anthocyanin acyltransferase	-	-	-	-	-	-	-	-	-	-	PF02458.15	Transferase	--	--	GO:0016747	transferase activity, transferring acyl groups other than amino-acyl groups	--	--
TRINITY_DN44437_c0_g1	7.88537	23.2784	-1.5617	0.037322	1	gi|326488263|dbj|BAJ93800.1|	326488263	429	1.73e-148	predicted protein, partial [Hordeum vulgare subsp. vulgare]	gi|670440840|ref|XM_008662465.1|	670440840	372	2e-98	PREDICTED: Zea mays uncharacterized LOC103639741 (LOC103639741), mRNA	-	-	-	-	-	-	-	-	-	-	-	-	-	-	-	PF05910.12	DUF868	-	-	-	-	-	-
TRINITY_DN60297_c0_g1	7.3788	22.0199	-1.5773	0.049243	1	gi|670020894|emb|CDJ26408.1|	670020894	158	1.02e-43	unnamed protein product [Triticum aestivum]	gi|1130625419|ref|XM_010908407.2|	1130625419	117	9.79e-22	PREDICTED: Elaeis guineensis ubiquinol oxidase 2, mitochondrial-like (LOC105033543), mRNA	gi|3915618|sp|Q40294.2|AOX1_MANIN	3915618	96.7	2.08e-21	RecName: Full=Ubiquinol oxidase, mitochondrial; AltName: Full=Alternative oxidase; Flags: Precursor [Mangifera indica]	-	-	-	-	-	-	-	-	-	-	PF01786.17	AOX	GO:0055114	oxidation-reduction process	GO:0009916//GO:0046872	alternative oxidase activity//metal ion binding	GO:0016021//GO:0070469	integral component of membrane//respirasome
TRINITY_DN61289_c1_g2	19.5875	59.1879	-1.5954	0.0015704	1	gi|326488779|dbj|BAJ98001.1|	326488779	74.7	8.79e-14	predicted protein [Hordeum vulgare subsp. vulgare]	gi|1149701224|ref|XR_002228967.1|	1149701224	363	1.13e-95	PREDICTED: Aegilops tauschii subsp. tauschii uncharacterized LOC109747077 (LOC109747077), ncRNA	-	-	-	-	-	-	-	-	-	-	-	-	-	-	-	-	-	-	-	-	-	-	-
TRINITY_DN46245_c0_g1	7.1306	21.5961	-1.5987	0.047529	1	gi|326497531|dbj|BAK05855.1|	326497531	297	3.99e-97	predicted protein, partial [Hordeum vulgare subsp. vulgare]	gi|1443079476|ref|XM_026025404.1|	1443079476	84.2	1.13e-11	PREDICTED: Oryza sativa Japonica Group heavy metal-associated isoprenylated plant protein 35 (LOC4338573), transcript variant X1, mRNA	-	-	-	-	-	-	-	-	-	-	-	-	KOG1603	P	Copper chaperone	PF00403.26	HMA	--	--	GO:0046872	metal ion binding	--	--
TRINITY_DN50621_c2_g1	15.1737	46.0949	-1.603	0.0028974	1	gi|326520788|dbj|BAJ92757.1|	326520788	432	3.94e-150	predicted protein [Hordeum vulgare subsp. vulgare]	gi|326508371|dbj|AK368250.1|	326508371	717	0	Hordeum vulgare subsp. vulgare mRNA for predicted protein, complete cds, clone: NIASHv2070N21	gi|27735199|sp|P52839.2|SOT12_ARATH	27735199	219	3.13e-68	RecName: Full=Cytosolic sulfotransferase 12; Short=AtSOT12; AltName: Full=Sulfotransferase 1; Short=AtST1	-	-	-	-	-	-	-	KOG1584	R	Sulfotransferase	PF00685.27	Sulfotransfer_1	--	--	GO:0008146	sulfotransferase activity	--	--
TRINITY_DN36159_c0_g1	20.0872	62.3695	-1.6346	0.023839	1	gi|1046772971|gb|OCK81329.1|	1046772971	141	5.45e-42	putative chaperone/heat shock protein Hsp12 [Lepidopterella palustris CBS 459.81]	gi|1580986187|gb|CP036224.1|	1580986187	63.9	5.13e-06	Talaromyces funiculosus strain X33 chromosome 2	gi|1708321|sp|P50519.1|HSP9_SCHPO	1708321	57.4	1.09e-10	RecName: Full=Heat shock protein hsp9	-	-	-	-	-	-	-	-	-	-	PF04119.12	HSP9_HSP12	GO:0010972//GO:0006950	negative regulation of G2/M transition of mitotic cell cycle//response to stress	--	--	GO:0005634//GO:0005829	nucleus//cytosol
TRINITY_DN43927_c0_g1	7.15016	22.2165	-1.6356	0.038246	1	gi|721669388|ref|XP_010236274.1|	721669388	187	4.28e-52	protein MEI2-like 7 [Brachypodium distachyon]	gi|932282624|gb|CP012610.1|	932282624	76.8	2.34e-09	Oryza sativa Indica Group cultivar RP Bio-226 chromosome 2 sequence	gi|75322250|sp|Q64M78.1|OML4_ORYSJ	75322250	82.8	2.54e-15	RecName: Full=Protein MEI2-like 4; Short=OML4; AltName: Full=MEI2-like protein 4	-	-	-	-	-	-	-	KOG4660	D	Protein Mei2, essential for commitment to meiosis, and related proteins	PF04059.12	RRM_2	--	--	GO:0003676	nucleic acid binding	--	--
TRINITY_DN45573_c0_g1	7.20022	22.4546	-1.6409	0.032486	1	gi|545693636|gb|AGW47722.1|	545693636	54.3	1.05e-06	RAPT-2 [Hordeum vulgare subsp. vulgare]	-	-	-	-	-	gi|75265958|sp|Q9SJR0.1|ERF24_ARATH	75265958	49.3	9.76e-06	RecName: Full=Ethylene-responsive transcription factor ERF024	-	-	-	-	-	-	-	-	-	-	-	-	-	-	-	-	-	-
TRINITY_DN39917_c0_g1	13.2347	41.6385	-1.6536	0.0055683	1	gi|902039000|gb|KNA02748.1|	902039000	62.8	2.53e-10	hypothetical protein SOVF_215730, partial [Spinacia oleracea]	gi|930810696|gb|KT342854.1|	930810696	730	0	Uncultured bacterium 4C6 genomic sequence	-	-	-	-	-	-	-	-	-	-	-	-	-	-	-	-	-	-	-	-	-	-	-
TRINITY_DN45037_c0_g1	10.5298	33.7523	-1.6805	0.007282	1	gi|326524125|dbj|BAJ97073.1|	326524125	428	1.69e-141	predicted protein, partial [Hordeum vulgare subsp. vulgare]	gi|1205974855|ref|XM_002442527.2|	1205974855	361	6.67e-95	PREDICTED: Sorghum bicolor cation/calcium exchanger 1 (LOC8071496), mRNA	gi|74627104|sp|P87122.1|YDL6_SCHPO	74627104	54.3	2.24e-06	RecName: Full=Putative cation exchanger C3A12.06c	-	-	-	-	-	-	-	KOG2399	P	K+-dependent Na+:Ca2+ antiporter	PF01699.24	Na_Ca_ex	GO:0055085	transmembrane transport	--	--	GO:0016021//GO:0005739	integral component of membrane//mitochondrion
TRINITY_DN44171_c0_g1	8.84814	28.3964	-1.6823	0.013737	1	gi|474019858|gb|EMS52851.1|	474019858	365	3.27e-122	hypothetical protein TRIUR3_33342 [Triticum urartu]	gi|1251769855|dbj|AK450677.1|	1251769855	174	7.03e-39	Triticum aestivum mRNA, clone: tplb0040m06, cultivar Chinese Spring	-	-	-	-	-	-	-	-	-	-	-	-	-	-	-	PF01657.17	Stress-antifung	--	--	GO:0005488	binding	GO:0043231//GO:0044444	intracellular membrane-bounded organelle//cytoplasmic part
TRINITY_DN48797_c6_g1	177.484	572.099	-1.6886	0.028572	1	gi|870765728|gb|KMS65245.1|	870765728	82.8	2.74e-17	hypothetical protein BVRB_037930, partial [Beta vulgaris subsp. vulgaris]	gi|1026250285|gb|CP015378.1|	1026250285	780	0	Fictibacillus phosphorivorans strain G25-29, complete genome	-	-	-	-	-	-	-	-	-	-	-	-	-	-	-	-	-	--	--	--	--	GO:0009536	plastid
TRINITY_DN61415_c1_g2	11.042	35.6297	-1.6901	0.015386	1	gi|1063246195|gb|ODQ68767.1|	1063246195	172	7.1e-52	hypothetical protein LIPSTDRAFT_7443 [Lipomyces starkeyi NRRL Y-11557]	gi|1552102408|gb|CP028129.1|	1552102408	1389	0	Rathayibacter rathayi strain DSM 7485 chromosome, complete genome	gi|110816488|sp|Q3BAI2.1|YCX91_PHAAO	110816488	66.2	9.19e-13	RecName: Full=Uncharacterized protein ORF91 (chloroplast) [Phalaenopsis aphrodite subsp. formosana]	-	-	-	-	-	-	-	-	-	-	-	-	--	--	GO:0016787	hydrolase activity	GO:0009536	plastid
TRINITY_DN30163_c0_g1	5.88644	19.0052	-1.6909	0.045392	1	gi|284927592|gb|ADC29516.1|	284927592	140	5.72e-43	polyubiquitin, partial [Citrus sinensis]	gi|1149803743|ref|XM_020306350.1|	1149803743	246	2.06e-61	PREDICTED: Aegilops tauschii subsp. tauschii polyubiquitin-like (LOC109747267), mRNA	gi|302595951|sp|P0CG74.1|UBI4P_CANAX	302595951	112	8e-31	RecName: Full=Polyubiquitin; Contains: RecName: Full=Ubiquitin; Flags: Precursor	Organismal Systems	Endocrine system	PPAR signaling pathway	ko03320	K08770	ubiquitin C	--	KOG0001	OR	Ubiquitin and ubiquitin-like proteins	PF00240.23	ubiquitin	-	-	-	-	-	-
TRINITY_DN4062_c0_g1	6.11831	19.8627	-1.6989	0.038239	1	gi|501000287|ref|YP_007947888.1|	501000287	187	6.87e-53	Ycf27 (chloroplast) [Pyropia haitanensis]	gi|1214244139|gb|CP022236.1|	1214244139	1317	0	Exiguobacterium oxidotolerans strain N4-1P genome	gi|190358881|sp|P32040.2|Y851_SYNP2	190358881	181	6.78e-52	RecName: Full=Probable transcriptional regulatory protein SYNPCC7002_A0851	-	-	-	-	-	-	-	KOG0519	T	Sensory transduction histidine kinase	PF00672.25//PF00512.25//PF00072.24//PF00486.28	HAMP//HisKA//Response_reg//Trans_reg_C	-	-	-	-	-	-
TRINITY_DN62982_c0_g3	7.21924	23.4494	-1.6996	0.022722	1	gi|371924987|tpe|CBZ41152.1|	371924987	118	1.09e-27	TPA: NAC transcription factor [Hordeum vulgare subsp. vulgare]	gi|1256609366|ref|XM_004975801.2|	1256609366	255	1.93e-63	PREDICTED: Setaria italica NAC domain-containing protein 92 (LOC101778459), transcript variant X1, mRNA	gi|75164838|sp|Q949N0.1|NAC53_ARATH	75164838	79.7	4.13e-15	RecName: Full=NAC domain-containing protein 53; Short=ANAC053; AltName: Full=Protein ANTHER INDEHISCENCE FACTOR; AltName: Full=Protein NTM1-like 4	-	-	-	-	-	-	-	-	-	-	PF02365.15	NAM	GO:0006355	regulation of transcription, DNA-templated	GO:0003677	DNA binding	GO:0016020//GO:0005634	membrane//nucleus
TRINITY_DN49390_c0_g1	7.79943	25.5306	-1.7108	0.01984	1	gi|326487586|dbj|BAK05465.1|	326487586	324	2.64e-109	predicted protein [Hordeum vulgare subsp. vulgare]	gi|242385119|emb|FP093171.1|	242385119	172	1.89e-38	Phyllostachys edulis cDNA clone: bphylf026o06, full insert sequence	-	-	-	-	-	-	-	-	-	-	-	-	-	-	-	PF00397.26	WW	-	-	-	-	-	-
TRINITY_DN39806_c0_g1	6.22166	20.4298	-1.7153	0.029155	1	gi|599153997|gb|EYE93268.1|	599153997	70.1	4.04e-15	hypothetical protein EURHEDRAFT_414469, partial [Aspergillus ruber CBS 135680]	gi|258575852|ref|XM_002542062.1|	258575852	84.2	2.47e-12	Uncinocarpus reesii 1704 predicted protein, mRNA	-	-	-	-	-	-	-	-	-	-	-	-	-	-	-	-	-	-	-	-	-	-	-
TRINITY_DN52376_c0_g1	7.43263	24.8462	-1.7411	0.018689	1	gi|21671927|gb|AAM74289.1|AC083944_7	21671927	117	9.86e-28	Hypothetical protein [Oryza sativa Japonica Group]	-	-	-	-	-	-	-	-	-	-	-	-	-	-	-	-	-	-	-	-	PF04504.14	DUF573	--	--	--	--	GO:0009536	plastid
TRINITY_DN38731_c0_g1	6.97212	23.4525	-1.7501	0.017407	1	gi|110288656|gb|ABG65932.1|	110288656	511	6.63e-177	Lecithin:cholesterol acyltransferase family protein, expressed [Oryza sativa Japonica Group]	gi|32972309|dbj|AK062291.1|	32972309	477	5.66e-130	Oryza sativa Japonica Group cDNA clone:001-100-E09, full insert sequence	gi|729921|sp|Q08758.1|LCAT_PAPAN	729921	123	2.44e-29	RecName: Full=Phosphatidylcholine-sterol acyltransferase; AltName: Full=Lecithin-cholesterol acyltransferase; AltName: Full=Phospholipid-cholesterol acyltransferase; Flags: Precursor	Cellular Processes	Transport and catabolism	Lysosome	ko04142	K06129	lysophospholipase III	3.1.1.5	KOG2369	I	Lecithin:cholesterol acyltransferase (LCAT)/Acyl-ceramide synthase	PF02450.15	LCAT	--	--	GO:0016746	transferase activity, transferring acyl groups	GO:0016023//GO:0005739	//mitochondrion
TRINITY_DN63714_c0_g1	9.48216	32.5994	-1.7816	0.0065096	1	gi|326503232|dbj|BAJ99241.1|	326503232	324	9.84e-106	predicted protein [Hordeum vulgare subsp. vulgare]	gi|1492116023|ref|XM_026801658.1|	1492116023	84.2	9.18e-12	PREDICTED: Phoenix dactylifera protein JINGUBANG-like (LOC103698649), mRNA	gi|20141589|sp|Q09990.2|LIN23_CAEEL	20141589	55.5	3.29e-07	RecName: Full=F-box/WD repeat-containing protein lin-23; AltName: Full=Abnormal cell lineage protein 23	-	-	-	-	-	-	-	KOG4155	R	FOG: WD40 repeat	PF00400.32	WD40	-	-	-	-	-	-
TRINITY_DN49609_c3_g3	5.85271	20.1304	-1.7822	0.030952	1	gi|326514756|dbj|BAJ99739.1|	326514756	79.7	8.11e-18	predicted protein [Hordeum vulgare subsp. vulgare]	gi|242382592|emb|FP091834.1|	242382592	259	3.64e-65	Phyllostachys edulis cDNA clone: bphyst027h10, full insert sequence	gi|75181883|sp|Q9M1J1.1|FIS1A_ARATH	75181883	50.4	6.39e-08	RecName: Full=Mitochondrial fission 1 protein A; AltName: Full=FIS1 homolog A; Short=AtFIS1a; AltName: Full=Protein BIGYIN 1	-	-	-	-	-	-	-	KOG3364	M	Membrane protein involved in organellar division	-	-	GO:0000266	mitochondrial fission	--	--	GO:0016021	integral component of membrane
TRINITY_DN41281_c0_g1	6.23907	21.6604	-1.7957	0.02465	1	gi|326490015|dbj|BAJ94081.1|	326490015	139	4.86e-38	predicted protein [Hordeum vulgare subsp. vulgare]	gi|326506953|dbj|AK364351.1|	326506953	93.5	1.34e-14	Hordeum vulgare subsp. vulgare mRNA for predicted protein, complete cds, clone: NIASHv2024B06	-	-	-	-	-	-	-	-	-	-	-	-	-	-	-	-	-	--	--	--	--	GO:0016021	integral component of membrane
TRINITY_DN40947_c0_g1	4.87199	16.9249	-1.7966	0.047594	1	gi|474385182|gb|EMS64912.1|	474385182	184	8.67e-54	hypothetical protein TRIUR3_08372 [Triticum urartu]	gi|241989012|dbj|AK335991.1|	241989012	89.8	2.42e-13	Triticum aestivum cDNA, clone: SET2_P10, cultivar: Chinese Spring	-	-	-	-	-	-	-	-	-	-	-	-	-	-	-	-	-	-	-	-	-	-	-
TRINITY_DN45861_c2_g1	15.7648	55.7701	-1.8228	0.017602	1	gi|1045460300|gb|OCF53728.1|	1045460300	530	0	hypothetical protein I206_01035 [Kwoniella pini CBS 10737]	gi|758198870|ref|XM_011323503.1|	758198870	73.1	3.14e-08	Fusarium graminearum PH-1 hypothetical protein partial mRNA	gi|12230109|sp|Q9ZK41.1|GLUP_HELPJ	12230109	86.3	5.93e-17	RecName: Full=Putative glucose/galactose transporter	-	-	-	-	-	-	-	-	-	-	PF07690.16	MFS_1	--	--	--	--	GO:0016020	membrane
TRINITY_DN41878_c0_g1	7.76678	27.8214	-1.8408	0.0095446	1	gi|701780082|gb|KGQ13429.1|	701780082	286	3.07e-92	putative oxidoreductase yhhX [Beauveria bassiana D1-5]	gi|1109143385|gb|CP018057.1|	1109143385	1321	0	Exiguobacterium sp. ZWU0009, complete genome	gi|3025087|sp|P77503.1|YCJS_ECOLI	3025087	60.5	6.59e-09	RecName: Full=Uncharacterized oxidoreductase YcjS	-	-	-	-	-	-	-	-	-	-	PF01408.22//PF02894.17//PF04005.12	GFO_IDH_MocA//GFO_IDH_MocA_C//Hus1	-	-	-	-	-	-
TRINITY_DN49653_c2_g1	101.155	364.384	-1.8489	0.0082292	1	gi|758344886|dbj|GAN11851.1|	758344886	165	1.72e-48	hydrolase, partial [Mucor ambiguus]	gi|1004607155|gb|KT865863.1|	1004607155	1037	0	Exiguobacterium sp. ALBL_197 23S ribosomal RNA gene, partial sequence	gi|110816488|sp|Q3BAI2.1|YCX91_PHAAO	110816488	88.6	6.95e-22	RecName: Full=Uncharacterized protein ORF91 (chloroplast) [Phalaenopsis aphrodite subsp. formosana]	-	-	-	-	-	-	-	-	-	-	-	-	--	--	GO:0016787	hydrolase activity	GO:0009507	chloroplast
TRINITY_DN60529_c0_g2	6.57105	23.9146	-1.8637	0.014927	1	gi|357123308|ref|XP_003563353.1|	357123308	63.9	1.25e-08	F-box protein AFR [Brachypodium distachyon]	gi|1327756030|gb|KY552663.1|	1327756030	202	2.43e-47	Triticum aestivum cultivar Chinese Spring F-box protein AFR-like protein mRNA, complete cds	-	-	-	-	-	-	-	-	-	-	-	-	-	-	-	-	-	-	-	-	-	-	-
TRINITY_DN57610_c4_g2	10.2816	38.1871	-1.893	0.0063018	1	gi|870749864|gb|KMS64603.1|	870749864	43.1	1.31e-13	hypothetical protein BVRB_018590 [Beta vulgaris subsp. vulgaris]	gi|1594476705|gb|CP037922.1|	1594476705	396	4.82e-106	Hymenobacter sp. 17J36-26 chromosome, complete genome	-	-	-	-	-	-	-	-	-	-	-	-	-	-	-	-	-	-	-	-	-	-	-
TRINITY_DN56199_c0_g2	4.92367	18.6152	-1.9187	0.023642	1	gi|326503442|dbj|BAJ86227.1|	326503442	227	4.38e-70	predicted protein [Hordeum vulgare subsp. vulgare]	gi|34146879|gb|AC130609.2|	34146879	438	9.54e-119	Oryza sativa Japonica Group cultivar Nipponbare chromosome 5 clone P0048F12, complete sequence	gi|226736750|sp|Q9SFB7.2|QRT2_ARATH	226736750	48.5	9.21e-06	RecName: Full=Polygalacturonase QRT2; Short=AtQRT2; Short=PG QRT2; AltName: Full=Pectinase QRT2; AltName: Full=Protein QUARTET 2; Flags: Precursor	-	-	-	-	-	-	-	-	-	-	PF00295.17	Glyco_hydro_28	GO:0005975//GO:0071555	carbohydrate metabolic process//cell wall organization	GO:0004650	polygalacturonase activity	GO:0016021//GO:0005576	integral component of membrane//extracellular region
TRINITY_DN57805_c1_g1	8.18147	30.9981	-1.9217	0.0051306	1	gi|902197648|gb|KNA13487.1|	902197648	178	6.05e-55	hypothetical protein SOVF_116540 [Spinacia oleracea]	gi|470488102|ref|NR_076851.1|	470488102	981	0	Pedobacter saltans strain DSM 12145 23S ribosomal RNA gene, complete sequence	gi|110816488|sp|Q3BAI2.1|YCX91_PHAAO	110816488	76.6	4.85e-17	RecName: Full=Uncharacterized protein ORF91 (chloroplast) [Phalaenopsis aphrodite subsp. formosana]	-	-	-	-	-	-	-	-	-	-	-	-	--	--	--	--	GO:0005739	mitochondrion
TRINITY_DN53819_c0_g2	3.87442	14.7548	-1.9291	0.049403	1	gi|357132460|ref|XP_003567848.1|	357132460	527	0	phospholipase A1-II 7 [Brachypodium distachyon]	gi|1149822816|ref|XM_020314018.1|	1149822816	394	4.57e-105	PREDICTED: Aegilops tauschii subsp. tauschii phospholipase A1-II 7-like (LOC109755133), mRNA	gi|75174942|sp|Q9LNC2.1|PLA18_ARATH	75174942	276	4.92e-88	RecName: Full=Phospholipase A1-IIalpha	-	-	-	-	-	-	-	KOG4569	I	Predicted lipase	PF01764.25//PF05318.12	Lipase_3//Tombus_movement	GO:0006629	lipid metabolic process	GO:0016787	hydrolase activity	--	--
TRINITY_DN44460_c0_g1	4.98897	19.2601	-1.9488	0.02218	1	gi|326496060|dbj|BAJ90651.1|	326496060	360	3.12e-121	predicted protein [Hordeum vulgare subsp. vulgare]	gi|32994867|dbj|AK109658.1|	32994867	723	0	Oryza sativa Japonica Group cDNA clone:002-140-F10, full insert sequence	gi|75127127|sp|Q6NPN5.1|FK113_ARATH	75127127	129	9.98e-34	RecName: Full=F-box/kelch-repeat protein At5g26960	-	-	-	-	-	-	-	KOG1072	R	FOG: Kelch repeat	PF01344.25	Kelch_1	--	--	GO:0008270	zinc ion binding	GO:0016021	integral component of membrane
TRINITY_DN54428_c1_g3	6.65052	25.6895	-1.9496	0.044099	1	gi|326488733|dbj|BAJ97978.1|	326488733	98.6	9.81e-25	predicted protein [Hordeum vulgare subsp. vulgare]	gi|1371051916|ref|XM_024457848.1|	1371051916	224	3.13e-54	PREDICTED: Brachypodium distachyon transcription factor ILI6 (LOC100821441), transcript variant X6, mRNA	gi|122247481|sp|Q10R47.1|ILI3_ORYSJ	122247481	68.2	4.96e-14	RecName: Full=Transcription factor ILI3; Short=OsILI3; AltName: Full=Basic helix-loop-helix protein 153; Short=OsbHLH153; AltName: Full=Protein INCREASED LEAF INCLINATION 3; AltName: Full=bHLH transcription factor bHLH153	-	-	-	-	-	-	-	-	-	-	-	-	GO:0006355//GO:0080113//GO:0009742	regulation of transcription, DNA-templated//regulation of seed growth//brassinosteroid mediated signaling pathway	GO:0046983	protein dimerization activity	GO:0005634	nucleus
TRINITY_DN56056_c6_g4	7.56971	29.4739	-1.9611	0.005456	1	gi|357135701|ref|XP_003569447.1|	357135701	93.6	5.56e-24	uncharacterized protein LOC100828693 [Brachypodium distachyon]	gi|554777811|dbj|AK431570.1|	554777811	165	9.5e-37	Brachypodium distachyon mRNA, clone: PL016C01-A-047_I13	-	-	-	-	-	-	-	-	-	-	-	-	-	-	-	-	-	--	--	--	--	GO:0016021	integral component of membrane
TRINITY_DN60566_c0_g2	6.18577	24.192	-1.9675	0.026335	1	gi|473969945|gb|EMS51390.1|	473969945	308	2.74e-100	ETHYLENE INSENSITIVE 3-like 3 protein [Triticum urartu]	gi|1371073297|ref|XM_014901556.2|	1371073297	558	5.84e-155	PREDICTED: Brachypodium distachyon ETHYLENE INSENSITIVE 3-like 3 protein (LOC100821424), transcript variant X3, mRNA	gi|37078118|sp|O23115.1|EIL2_ARATH	37078118	116	8.84e-30	RecName: Full=ETHYLENE INSENSITIVE 3-like 2 protein	-	-	-	-	-	-	-	-	-	-	PF04873.13	EIN3	GO:0006633//GO:0055114//GO:0006355//GO:0031408	fatty acid biosynthetic process//oxidation-reduction process//regulation of transcription, DNA-templated//oxylipin biosynthetic process	GO:0046872//GO:0016702//GO:0003700	metal ion binding//oxidoreductase activity, acting on single donors with incorporation of molecular oxygen, incorporation of two atoms of oxygen//DNA-binding transcription factor activity	GO:0005634	nucleus
TRINITY_DN48902_c6_g1	11.3729	44.6047	-1.9716	0.013937	1	gi|474072432|gb|EMS54408.1|	474072432	62	1.44e-07	Peptide transporter PTR2 [Triticum urartu]	gi|1149820828|ref|XR_002230665.1|	1149820828	135	3.37e-27	PREDICTED: Aegilops tauschii subsp. tauschii uncharacterized LOC109754355 (LOC109754355), ncRNA	-	-	-	-	-	-	-	-	-	-	-	-	-	-	-	-	-	-	-	-	-	-	-
TRINITY_DN53024_c3_g2	47.1885	193.78	-2.0379	0.010019	1	gi|111379068|gb|ABH09321.1|	111379068	55.8	6.22e-07	leucine rich protein [Arachis hypogaea]	gi|1174582360|gb|CP015108.1|	1174582360	789	0	Sporosarcina ureae strain S204, complete genome	-	-	-	-	-	-	-	-	-	-	-	-	-	-	-	-	-	-	-	-	-	-	-
TRINITY_DN48074_c0_g2	6.10199	25.3983	-2.0574	0.0073418	1	gi|701777820|gb|KGQ11486.1|	701777820	62	6.26e-07	Flagellar basal-body rod protein flgG [Beauveria bassiana D1-5]	gi|1272247654|gb|CP024159.1|	1272247654	3179	0	Pseudomonas mosselii strain PtA1 chromosome, complete genome	gi|122258120|sp|Q02IQ0.1|FLGH_PSEAB	122258120	374	9.34e-122	RecName: Full=Flagellar L-ring protein; AltName: Full=Basal body L-ring protein; Flags: Precursor	Cellular Processes	Cell motility	Flagellar assembly	ko02040	K02392	flagellar basal-body rod protein FlgG	--	-	-	-	PF00460.20//PF06429.13//PF02107.16//PF02119.16	Flg_bb_rod//Flg_bbr_C//FlgH//FlgI	-	-	-	-	-	-
TRINITY_DN48943_c2_g3	6.27226	27.1386	-2.1133	0.017933	1	gi|474329464|gb|EMS62539.1|	474329464	144	7.9e-39	hypothetical protein TRIUR3_29830 [Triticum urartu]	gi|1282798539|gb|MG560142.1|	1282798539	87.9	7.71e-13	Triticum aestivum omega gliadin-D1, omega gliadin-D2, omega gliadin-D3, gamma gliadin-D1, delta gliadin-D1, gamma gliadin-D2, gamma gliadin-D3, gamma gliadin-D4, LMW-D1, LMW-D2, LMW-D3, LMW-D6, and LMW-D7 genes, complete cds	-	-	-	-	-	-	-	-	-	-	-	-	-	-	-	-	-	--	--	GO:0005488//GO:0003824	binding//catalytic activity	--	--
TRINITY_DN63073_c0_g2	3.22569	13.9655	-2.1142	0.042733	1	gi|1002278487|ref|XP_015643570.1|	1002278487	294	4.89e-95	NAC domain-containing protein 22-like [Oryza sativa Japonica Group]	gi|326498302|dbj|AK367376.1|	326498302	265	3.95e-66	Hordeum vulgare subsp. vulgare mRNA for predicted protein, partial cds, clone: NIASHv2055P15	gi|75268448|sp|Q52QH4.1|NAC68_ORYSJ	75268448	120	1.16e-29	RecName: Full=NAC domain-containing protein 68; Short=ONAC068	-	-	-	-	-	-	-	-	-	-	PF02365.15	NAM	-	-	-	-	-	-
TRINITY_DN48292_c1_g1	15.153	66.7952	-2.1401	0.0003055	0.68847	gi|522700500|gb|AGQ17376.1|	522700500	525	2e-162	RGA2a [Aegilops tauschii]	gi|1371084045|ref|XM_024462709.1|	1371084045	789	0	PREDICTED: Brachypodium distachyon uncharacterized LOC100833723 (LOC100833723), transcript variant X1, mRNA	gi|322510093|sp|Q9SXB8.3|Y1133_ARATH	322510093	162	1.42e-39	RecName: Full=G-type lectin S-receptor-like serine/threonine-protein kinase At1g11330; Flags: Precursor	-	-	-	-	-	-	-	-	-	-	PF00069.25//PF00635.26//PF11502.8	Pkinase//Motile_Sperm//BCL9	--	--	GO:0043531//GO:0016301	ADP binding//kinase activity	GO:0044763//GO:0005622	//intracellular
TRINITY_DN59028_c1_g2	2.94484	13.2228	-2.1668	0.038738	1	gi|326524187|dbj|BAJ97104.1|	326524187	379	1.4e-128	predicted protein [Hordeum vulgare subsp. vulgare]	gi|164414963|gb|EU146266.1|	164414963	128	3.2e-25	Secale cereale genotype M39A-1-6 Stp gene marker genomic sequence	gi|123796972|sp|Q3U481.1|MFS12_MOUSE	123796972	90.9	1.45e-19	RecName: Full=Major facilitator superfamily domain-containing protein 12	-	-	-	-	-	-	-	KOG4830	G	Predicted sugar transporter	PF13347.6	MFS_2	GO:0008643	carbohydrate transport	--	--	GO:0016021	integral component of membrane
TRINITY_DN46800_c1_g1	4.85513	21.9303	-2.1753	0.0077862	1	gi|640927800|gb|KDN71367.1|	640927800	105	2.51e-23	putative GPI anchored serine-rich protein [Colletotrichum sublineola]	-	-	-	-	-	-	-	-	-	-	-	-	-	-	-	-	-	-	-	-	PF01563.16	Alpha_E3_glycop	-	-	-	-	-	-
TRINITY_DN45965_c0_g1	3.57454	16.5139	-2.2079	0.02313	1	gi|474212461|gb|EMS58915.1|	474212461	197	5.95e-52	Splicing factor 3B subunit 2 [Triticum urartu]	gi|1256304088|ref|XM_004954414.4|	1256304088	65.8	5.36e-06	PREDICTED: Setaria italica splicing factor 3B subunit 2 (LOC101776662), mRNA	gi|74626029|sp|Q9UUI3.1|SA145_SCHPO	74626029	67.4	1.3e-10	RecName: Full=Pre-mRNA-splicing factor sap145; AltName: Full=Spliceosome-associated protein 145	-	-	-	-	-	-	-	KOG2330	A	Splicing factor 3b, subunit 2	PF04037.13//PF11283.8	DUF382//DUF3084	--	--	--	--	GO:0005634	nucleus
TRINITY_DN50452_c0_g2	4.29343	19.9969	-2.2196	0.010695	1	gi|474246096|gb|EMS59994.1|	474246096	418	7.62e-146	hypothetical protein TRIUR3_11794 [Triticum urartu]	-	-	-	-	-	-	-	-	-	-	-	-	-	-	-	-	-	-	-	-	-	-	-	-	-	-	-	-
TRINITY_DN47882_c0_g1	7.86257	37.0275	-2.2355	0.00065287	1	gi|630028028|ref|XP_007836345.1|	630028028	245	8.22e-80	hypothetical protein PFICI_09573 [Pestalotiopsis fici W106-1]	-	-	-	-	-	-	-	-	-	-	-	-	-	-	-	-	-	-	-	-	PF05532.12	CsbD	-	-	-	-	-	-
TRINITY_DN41966_c0_g1	2.6281	12.3772	-2.2356	0.042174	1	gi|474404744|gb|EMS66411.1|	474404744	62.4	1.18e-08	hypothetical protein TRIUR3_12516 [Triticum urartu]	gi|1149741097|ref|XM_020338673.1|	1149741097	1210	0	PREDICTED: Aegilops tauschii subsp. tauschii putative glycine-rich cell wall structural protein 1 (LOC109780083), mRNA	-	-	-	-	-	-	-	-	-	-	-	-	-	-	-	-	-	-	-	-	-	-	-
TRINITY_DN72753_c0_g1	3.89182	18.3939	-2.2407	0.012566	1	gi|820656749|emb|CED84034.1|	820656749	374	1.03e-124	hypothetical protein [Xanthophyllomyces dendrorhous]	-	-	-	-	-	-	-	-	-	-	-	-	-	-	-	-	-	-	-	-	-	-	--	--	--	--	GO:0016021	integral component of membrane
TRINITY_DN51972_c0_g3	17.4508	82.663	-2.244	1.6992e-06	0.021931	gi|404415279|gb|AFR67779.1|	404415279	133	1.43e-35	AP2 domain CBF protein [Triticum aestivum]	gi|60593371|gb|AY785858.1|	60593371	532	6.16e-147	Hordeum vulgare subsp. vulgare cultivar Optic HvCBF5 (CBF5) mRNA, complete cds	gi|75264300|sp|Q9LWV3.1|DRE1C_ORYSJ	75264300	51.2	1.55e-06	RecName: Full=Dehydration-responsive element-binding protein 1C; Short=Protein DREB1C; AltName: Full=Protein C-repeat-binding factor 1	-	-	-	-	-	-	-	-	-	-	-	-	GO:0006355	regulation of transcription, DNA-templated	GO:0003700//GO:0003677	DNA-binding transcription factor activity//DNA binding	GO:0005634	nucleus
TRINITY_DN39289_c1_g1	6.46608	30.9421	-2.2586	0.0044599	1	gi|636577603|ref|XP_008020140.1|	636577603	256	3.45e-85	hypothetical protein SETTUDRAFT_18855 [Exserohilum turcica Et28A]	gi|918823357|ref|XM_013574383.1|	918823357	294	2.73e-75	Aureobasidium namibiae CBS 147.97 DUF1761-domain-containing protein partial mRNA	gi|74625959|sp|Q9UTI9.1|YKZ2_SCHPO	74625959	95.1	2.22e-23	RecName: Full=UPF0591 membrane protein C15E1.02c	-	-	-	-	-	-	-	-	-	-	PF08570.10	DUF1761	--	--	--	--	GO:0016021//GO:0005737	integral component of membrane//cytoplasm
TRINITY_DN48214_c2_g1	7.46636	36.5021	-2.2895	0.0048036	1	gi|669031264|emb|CDM86136.1|	669031264	102	3.8e-20	unnamed protein product [Triticum aestivum]	gi|1149719553|ref|XM_020330152.1|	1149719553	93.5	2.45e-14	PREDICTED: Aegilops tauschii subsp. tauschii uncharacterized LOC109771453 (LOC109771453), mRNA	-	-	-	-	-	-	-	-	-	-	-	-	-	-	-	-	-	-	-	-	-	-	-
TRINITY_DN61205_c1_g1	2.91003	14.3942	-2.3064	0.02607	1	gi|720036327|ref|XP_010267319.1|	720036327	62.8	2.98e-09	PREDICTED: RING-H2 finger protein ATL57-like [Nelumbo nucifera]	gi|1149700518|ref|XM_020302776.1|	1149700518	664	0	PREDICTED: Aegilops tauschii subsp. tauschii RING-H2 finger protein ATL8-like (LOC109743686), mRNA	gi|68565338|sp|Q9SN28.1|ATL7_ARATH	68565338	52	3.86e-07	RecName: Full=RING-H2 finger protein ATL7	-	-	-	-	-	-	-	KOG0800	O	FOG: Predicted E3 ubiquitin ligase	PF09534.10//PF13639.6	Trp_oprn_chp//zf-RING_2	-	-	-	-	-	-
TRINITY_DN61244_c2_g2	2.6281	13.113	-2.3189	0.035246	1	gi|473794769|gb|EMS46484.1|	473794769	91.3	1.23e-21	hypothetical protein TRIUR3_20294 [Triticum urartu]	gi|1149745652|ref|XM_020340323.1|	1149745652	270	4.01e-68	PREDICTED: Aegilops tauschii subsp. tauschii E3 ubiquitin-protein ligase Os03g0188200-like (LOC109781723), mRNA	-	-	-	-	-	-	-	-	-	-	-	-	-	-	-	-	-	--	--	--	--	GO:0016021	integral component of membrane
TRINITY_DN51714_c1_g3	2.62864	13.2208	-2.3304	0.029088	1	gi|474325166|gb|EMS62430.1|	474325166	79.7	6.8e-15	Cysteine-rich receptor-like protein kinase 26 [Triticum urartu]	gi|30421164|gb|AY268139.1|	30421164	95.3	2.82e-15	Hordeum vulgare BAC 184G9, complete sequece	-	-	-	-	-	-	-	-	-	-	-	-	-	-	-	-	-	GO:0008152	metabolic process	GO:0046872//GO:0016491//GO:0016301//GO:1901363//GO:0097159	metal ion binding//oxidoreductase activity//kinase activity//heterocyclic compound binding//organic cyclic compound binding	GO:0016021	integral component of membrane
TRINITY_DN43914_c0_g1	3.92393	20.0275	-2.3516	0.0087873	1	gi|223511618|gb|EEF23832.1|	223511618	343	5.12e-111	conserved hypothetical protein [Ricinus communis]	gi|1494033249|gb|CP033019.1|	1494033249	1177	0	Janthinobacterium agaricidamnosum strain BHSEK chromosome, complete genome	gi|3913684|sp|Q56339.1|FLHF_TREPA	3913684	61.6	1.41e-08	RecName: Full=Flagellar biosynthesis protein FlhF; AltName: Full=Flagella-associated GTP-binding protein	-	-	-	-	-	-	-	-	-	-	PF12511.8//PF00448.22	DUF3716//SRP54	-	-	-	-	-	-
TRINITY_DN37173_c0_g1	2.60961	13.5555	-2.377	0.027924	1	gi|50313410|gb|AAT74577.1|	50313410	254	6.76e-84	conserved hypothetical protein [Chaetomium globosum]	gi|1148918194|ref|XM_020278450.1|	1148918194	213	8.28e-51	Diplodia corticola hypothetical protein (BKCO1_6900030), partial mRNA	gi|74625959|sp|Q9UTI9.1|YKZ2_SCHPO	74625959	92.8	1.8e-22	RecName: Full=UPF0591 membrane protein C15E1.02c	-	-	-	-	-	-	-	-	-	-	PF08570.10	DUF1761	--	--	--	--	GO:0016021//GO:0005737	integral component of membrane//cytoplasm
TRINITY_DN44425_c0_g2	3.52395	18.7495	-2.4116	0.0083366	1	gi|389633727|ref|XP_003714516.1|	389633727	283	3.64e-93	glycosyl hydrolase family 10 [Pyricularia oryzae 70-15]	gi|389622728|ref|XM_003708970.1|	389622728	145	2.8e-30	Magnaporthe oryzae 70-15 endoglucanase type F partial mRNA	gi|292495635|sp|C5J411.2|XYNC_ASPNG	292495635	223	2.86e-71	RecName: Full=Probable endo-1,4-beta-xylanase C; Short=Xylanase C; AltName: Full=1,4-beta-D-xylan xylanohydrolase C; Flags: Precursor	--	--	--	--	K01181	endo-1,4-beta-xylanase	3.2.1.8	-	-	-	PF00331.20	Glyco_hydro_10	GO:0052051//GO:0045493	obsolete interaction with host via protein secreted by type II secretion system//xylan catabolic process	GO:0031176	endo-1,4-beta-xylanase activity	GO:0005576	extracellular region
TRINITY_DN27183_c0_g1	4.22489	22.5396	-2.4155	0.0041464	1	gi|472904565|gb|EMS35745.1|	472904565	103	9.08e-26	hypothetical protein TRIUR3_32024 [Triticum urartu]	-	-	-	-	-	-	-	-	-	-	-	-	-	-	-	-	-	-	-	-	PF14547.6	Hydrophob_seed	-	-	-	-	-	-
TRINITY_DN46452_c0_g1	2.33092	12.8365	-2.4613	0.02661	1	gi|116782633|gb|ABK22584.1|	116782633	96.3	2.12e-19	unknown [Picea sitchensis]	gi|1172647821|gb|CP018016.1|	1172647821	2303	0	Kosakonia radicincitans DSM 16656, complete genome	gi|81572257|sp|Q7MYU9.1|RL9_PHOLL	81572257	236	7.02e-75	RecName: Full=50S ribosomal protein L9	-	-	-	-	-	-	-	-	-	-	PF00823.19//PF01250.17//PF00436.25//PF01281.19//PF03948.14//PF01084.20	PPE//Ribosomal_S6//SSB//Ribosomal_L9_N//Ribosomal_L9_C//Ribosomal_S18	--	--	--	--	GO:0005622	intracellular
TRINITY_DN48989_c1_g3	4.20586	23.3025	-2.47	0.013223	1	gi|473869182|gb|EMS47683.1|	473869182	65.1	4.07e-81	hypothetical protein TRIUR3_28489 [Triticum urartu]	-	-	-	-	-	gi|62900127|sp|O74423.1|ENT1_SCHPO	62900127	54.3	1.61e-06	RecName: Full=Epsin-1	-	-	-	-	-	-	-	-	-	-	PF03297.15	Ribosomal_S25	-	-	-	-	-	-
TRINITY_DN48480_c4_g3	2.94484	16.421	-2.4793	0.014305	1	gi|641739957|gb|AIA67010.1|	641739957	72.4	4.37e-15	defensin [Triticum aestivum]	gi|32128483|gb|BT008932.1|	32128483	243	6e-60	Triticum aestivum clone wde2f.pk001.k6:fis, full insert mRNA sequence	-	-	-	-	-	-	-	-	-	-	-	-	-	-	-	PF00304.20	Gamma-thionin	GO:0050832//GO:0031640	defense response to fungus//killing of cells of other organism	--	--	GO:0016023
TRINITY_DN47705_c2_g3	1.98099	11.0821	-2.4839	0.04676	1	gi|697101275|ref|XP_009595296.1|	697101275	28.1	4.61e-06	PREDICTED: threonine synthase, chloroplastic [Nicotiana tomentosiformis]	-	-	-	-	-	-	-	-	-	-	-	-	-	-	-	-	-	-	-	-	PF05308.11	Mito_fiss_reg	-	-	-	-	-	-
TRINITY_DN49910_c0_g1	10.318	58.5455	-2.5044	0.0052262	1	gi|474265587|gb|EMS60701.1|	474265587	75.9	5.43e-14	hypothetical protein TRIUR3_12558 [Triticum urartu]	gi|1251769923|dbj|AK451738.1|	1251769923	313	5.1e-81	Triticum aestivum mRNA, clone: tplb0049k22, cultivar Chinese Spring	-	-	-	-	-	-	-	-	-	-	-	-	-	-	-	-	-	-	-	-	-	-	-
TRINITY_DN38577_c1_g1	1.91083	10.8866	-2.5103	0.044262	1	gi|1066287485|ref|XP_018035547.1|	1066287485	107	1.6e-28	hypothetical protein CC84DRAFT_1165506 [Paraphaeosphaeria sporulosa]	gi|628054844|ref|XM_007696352.1|	628054844	69.4	1.19e-07	Bipolaris sorokiniana ND90Pr hypothetical protein partial mRNA	-	-	-	-	-	-	-	-	-	-	-	-	-	-	-	-	-	-	-	-	-	-	-
TRINITY_DN39618_c0_g1	1.9984	11.7717	-2.5584	0.026527	1	gi|226528539|ref|NP_001142763.1|	226528539	205	5.39e-65	uncharacterized protein LOC100274484 isoform 2 [Zea mays]	gi|226528538|ref|NM_001149291.1|	226528538	867	0	Zea mays uncharacterized LOC100274484 (LOC100274484), transcript variant 2, mRNA	-	-	-	-	-	-	-	-	-	-	-	-	-	-	-	-	-	-	-	-	-	-	-
TRINITY_DN113035_c0_g1	1.91083	11.7013	-2.6144	0.037858	1	gi|474012385|gb|EMS52588.1|	474012385	80.5	1.39e-13	L-ascorbate oxidase-like protein [Triticum urartu]	-	-	-	-	-	-	-	-	-	-	-	-	-	-	-	-	-	-	-	-	PF02362.21	B3	--	--	GO:0005488	binding	--	--
TRINITY_DN44580_c1_g3	1.9277	12.701	-2.72	0.02134	1	gi|474265432|gb|EMS60693.1|	474265432	419	4.13e-142	Receptor-like protein kinase THESEUS 1 [Triticum urartu]	gi|237823043|gb|AC217581.2|	237823043	771	0	Oryza punctata clone OP__Ba0046C09, complete sequence	gi|75337541|sp|Q9SR05.1|ANX1_ARATH	75337541	201	4.42e-58	RecName: Full=Receptor-like protein kinase ANXUR1; Flags: Precursor	-	-	-	-	-	-	-	KOG1187	T	Serine/threonine protein kinase	PF07714.17	Pkinase_Tyr	GO:0006468	protein phosphorylation	GO:0005524//GO:0004674	ATP binding//protein serine/threonine kinase activity	GO:0016021//GO:0016023	integral component of membrane//
TRINITY_DN44981_c0_g2	2.3119	15.6152	-2.7558	0.033249	1	gi|474432181|gb|EMS68053.1|	474432181	387	2.22e-128	Eukaryotic initiation factor iso-4F subunit p82-34 [Triticum urartu]	gi|94384045|emb|AM156960.1|	94384045	586	4.51e-163	Oryza glaberrima mRNA for putative eukaryotic translation initiation factor 4 gamma (eif(iso)4g gene), cultivar Tog5673	gi|442580994|sp|B9FXV5.2|IF4G_ORYSJ	442580994	142	4.49e-37	RecName: Full=Eukaryotic translation initiation factor 4G; Short=eIF-4G; Short=eIF4G; AltName: Full=Eukaryotic initiation factor 4F subunit p220; Short=eIF-4F p220 subunit	-	-	-	-	-	-	-	KOG0401	J	Translation initiation factor 4F, ribosome/mRNA-bridging subunit (eIF-4G)	PF02854.19	MIF4G	GO:0006413//GO:0006417	translational initiation//regulation of translation	GO:0003743	translation initiation factor activity	--	--
TRINITY_DN53027_c2_g1	1.28005	8.74907	-2.7729	0.048577	1	gi|870765728|gb|KMS65245.1|	870765728	58.5	7.11e-10	hypothetical protein BVRB_037930, partial [Beta vulgaris subsp. vulgaris]	gi|1233021400|gb|CP022736.1|	1233021400	302	4.43e-78	Herbaspirillum sp. meg3, complete genome	-	-	-	-	-	-	-	-	-	-	-	-	-	-	-	-	-	-	-	-	-	-	-
TRINITY_DN28461_c0_g1	4.47093	30.5633	-2.7732	0.039693	1	gi|451997640|gb|EMD90105.1|	451997640	104	6.58e-22	hypothetical protein COCHEDRAFT_1195380 [Bipolaris maydis C5]	-	-	-	-	-	-	-	-	-	-	-	-	-	-	-	-	-	-	-	-	-	-	-	-	-	-	-	-
TRINITY_DN45556_c1_g1	2.62756	18.1449	-2.7878	0.0041261	1	gi|223517602|gb|EEF25316.1|	223517602	158	4.43e-44	Flagellar basal-body rod protein flgC, putative [Ricinus communis]	gi|1639012656|emb|LR590467.1|	1639012656	148	5.02e-31	Bordetella pertussis strain NCTC13251 genome assembly, chromosome: 1	gi|2494526|sp|P75936.1|FLGD_ECOLI	2494526	126	2.76e-32	RecName: Full=Basal-body rod modification protein FlgD	-	-	-	-	-	-	-	-	-	-	PF00460.20//PF06429.13//PF03963.14//PF13861.6//PF13860.6	Flg_bb_rod//Flg_bbr_C//FlgD//FLgD_tudor//FlgD_ig	--	--	--	--	GO:0031514	motile cilium
TRINITY_DN48984_c5_g6	20.4817	152.601	-2.8974	0.013813	1	gi|474072432|gb|EMS54408.1|	474072432	98.2	3.78e-19	Peptide transporter PTR2 [Triticum urartu]	gi|1149833873|ref|XR_002232018.1|	1149833873	278	5.25e-70	PREDICTED: Aegilops tauschii subsp. tauschii uncharacterized LOC109759191 (LOC109759191), transcript variant X3, misc_RNA	-	-	-	-	-	-	-	-	-	-	-	-	-	-	-	-	-	-	-	-	-	-	-
TRINITY_DN52538_c1_g4	2.27871	17.5856	-2.9481	0.032173	1	gi|326489859|dbj|BAJ94003.1|	326489859	86.3	2.92e-21	predicted protein [Hordeum vulgare subsp. vulgare]	gi|554780577|dbj|AK434354.1|	554780577	183	1.94e-42	Brachypodium distachyon mRNA, clone: PL016C01-A-065_G19	-	-	-	-	-	-	-	-	-	-	-	-	-	-	-	PF04570.14	zf-FLZ	-	-	-	-	-	-
TRINITY_DN8643_c0_g1	1.31378	10.2702	-2.9667	0.024987	1	gi|326494314|dbj|BAJ90426.1|	326494314	631	0	predicted protein, partial [Hordeum vulgare subsp. vulgare]	gi|1189419119|gb|CP018161.1|	1189419119	935	0	Oryza sativa Indica Group cultivar Shuhui498 chromosome 5 sequence	gi|71153422|sp|Q9LLL8.1|SBT4E_ARATH	71153422	182	4.19e-50	RecName: Full=Subtilisin-like protease SBT4.14; AltName: Full=Cucumisin-like protein; AltName: Full=Subtilase subfamily 4 member 14; Short=AtSBT4.14; AltName: Full=Xylem serine proteinase 1; Short=AtXSP1; Flags: Precursor	-	-	-	-	-	-	-	-	-	-	PF00082.22//PF17766.1	Peptidase_S8//fn3_6	GO:0006508	proteolysis	GO:0004252	serine-type endopeptidase activity	GO:0005618//GO:0005576//GO:0016023	cell wall//extracellular region//
TRINITY_DN39602_c0_g2	1.96197	15.4245	-2.9749	0.0058177	1	gi|302691044|ref|XP_003035201.1|	302691044	107	1.2e-27	hypothetical protein SCHCODRAFT_50913 [Schizophyllum commune H4-8]	gi|367024052|ref|XM_003661263.1|	367024052	150	6.93e-32	Thermothelomyces thermophila ATCC 42464 hypothetical protein mRNA	gi|15214248|sp|Q9Y068.1|RIC1_PHYIN	15214248	68.6	3.31e-14	RecName: Full=Protein Ric1 [Phytophthora infestans]	-	-	-	-	-	-	-	-	-	-	PF01679.17	Pmp3	--	--	--	--	GO:0016021	integral component of membrane
TRINITY_DN185638_c0_g1	1.27951	10.3363	-3.0141	0.027362	1	gi|218199235|gb|EEC81662.1|	218199235	264	6.78e-79	hypothetical protein OsI_25211 [Oryza sativa Indica Group]	-	-	-	-	-	gi|44888115|sp|P93295.1|M310_ARATH	44888115	79.7	2.41e-16	RecName: Full=Uncharacterized mitochondrial protein AtMg00310; AltName: Full=ORF154	-	-	-	-	-	-	-	KOG1075	R	FOG: Reverse transcriptase	PF13966.6//PF13456.6	zf-RVT//RVT_3	-	-	-	-	-	-
TRINITY_DN48385_c1_g1	0.964388	8.25405	-3.0974	0.046706	1	gi|870765728|gb|KMS65245.1|	870765728	85.9	7.61e-20	hypothetical protein BVRB_037930, partial [Beta vulgaris subsp. vulgaris]	gi|1085860874|emb|LT629757.1|	1085860874	392	4.1e-105	Marmoricola scoriae strain DSM 22127 genome assembly, chromosome: I	-	-	-	-	-	-	-	-	-	-	-	-	-	-	-	-	-	-	-	-	-	-	-
TRINITY_DN38700_c0_g1	1.26264	10.9408	-3.1152	0.020194	1	gi|223514220|gb|EEF24377.1|	223514220	174	2.56e-51	Protein U precursor, putative [Ricinus communis]	gi|974005670|gb|CP013923.1|	974005670	71.3	6.62e-08	Achromobacter denitrificans strain USDA-ARS-USMARC-56712, complete genome	-	-	-	-	-	-	-	-	-	-	-	-	-	-	-	PF05229.15//PF00345.20	SCPU//PapD_N	-	-	-	-	-	-
TRINITY_DN53024_c2_g1	0.998118	9.05027	-3.1807	0.029331	1	gi|902058723|gb|KNA02890.1|	902058723	63.9	2.14e-11	hypothetical protein SOVF_214350, partial [Spinacia oleracea]	gi|1519564324|gb|CP033924.1|	1519564324	1133	0	Chryseobacterium lactis strain KC_1864 chromosome, complete genome	-	-	-	-	-	-	-	-	-	-	-	-	-	-	-	-	-	-	-	-	-	-	-
TRINITY_DN218298_c0_g1	0.997578	9.19642	-3.2046	0.028463	1	gi|669028532|emb|CDM82378.1|	669028532	151	3.69e-43	unnamed protein product [Triticum aestivum]	gi|1149737515|ref|XM_020337327.1|	1149737515	121	4.41e-23	PREDICTED: Aegilops tauschii subsp. tauschii ethylene-responsive transcription factor ERF062-like (LOC109778750), mRNA	gi|48428176|sp|Q9SVX5.1|DRE2F_ARATH	48428176	64.7	2.44e-11	RecName: Full=Dehydration-responsive element-binding protein 2F; Short=Protein DREB2F	-	-	-	-	-	-	-	-	-	-	PF00847.20	AP2	GO:0009908//GO:0006355	flower development//regulation of transcription, DNA-templated	GO:0003677//GO:0003700	DNA binding//DNA-binding transcription factor activity	GO:0005634	nucleus
TRINITY_DN177434_c0_g1	0.998118	9.52231	-3.254	0.026635	1	gi|1046793059|gb|OCL00780.1|	1046793059	216	8.06e-66	hypothetical protein K441DRAFT_710166 [Cenococcum geophilum 1.58]	-	-	-	-	-	gi|74581967|sp|O14128.1|PIL2_SCHPO	74581967	75.9	2.53e-14	RecName: Full=Probable sphingolipid long chain base-responsive protein pil2; AltName: Full=Protein kinase inhibitor pil2	-	-	-	-	-	-	-	-	-	-	PF13805.6	Pil1	-	-	-	-	-	-
TRINITY_DN119206_c0_g1	1.94618	18.5982	-3.2564	0.037607	1	gi|1066290287|ref|XP_018033184.1|	1066290287	300	1.23e-91	hypothetical protein CC84DRAFT_1219765 [Paraphaeosphaeria sporulosa]	gi|1087779690|ref|XM_018807999.1|	1087779690	89.8	2.16e-13	Trichoderma gamsii hypothetical protein (TGAM01_v207428), partial mRNA	-	-	-	-	-	-	-	-	-	-	-	-	-	-	-	PF14613.6	DUF4449	--	--	GO:0008289	lipid binding	--	--
TRINITY_DN59628_c0_g2	32.9585	317.157	-3.2665	0.01296	1	gi|125535226|gb|EAY81774.1|	125535226	375	2.79e-119	hypothetical protein OsI_36948 [Oryza sativa Indica Group]	gi|1149726550|ref|XM_020333569.1|	1149726550	1262	0	PREDICTED: Aegilops tauschii subsp. tauschii uncharacterized LOC109774795 (LOC109774795), transcript variant X15, mRNA	-	-	-	-	-	-	-	-	-	-	-	-	-	-	-	PF13768.6//PF14624.6	VWA_3//Vwaint	-	-	-	-	-	-
TRINITY_DN218761_c0_g1	1.29637	12.5383	-3.2738	0.026941	1	gi|636588035|ref|XP_008025356.1|	636588035	411	4.05e-141	hypothetical protein SETTUDRAFT_162924 [Exserohilum turcica Et28A]	gi|685854756|ref|XM_009256136.1|	685854756	148	3.1e-31	Fusarium pseudograminearum CS3096 hypothetical protein partial mRNA	-	-	-	-	-	-	-	-	-	-	-	-	-	-	-	PF01442.18//PF16043.5	Apolipoprotein//DUF4795	-	-	-	-	-	-
TRINITY_DN54912_c2_g1	1.61257	16.0289	-3.3132	0.0032369	1	gi|326502452|dbj|BAJ95289.1|	326502452	175	9.59e-51	predicted protein [Hordeum vulgare subsp. vulgare]	gi|554782209|dbj|AK435995.1|	554782209	182	2.39e-41	Brachypodium distachyon mRNA, clone: PL016C01-A-076_I05	gi|75261388|sp|Q6K7E6.1|ERF1_ORYSJ	75261388	75.5	1.52e-14	RecName: Full=Ethylene-responsive transcription factor 1; AltName: Full=Ethylene-responsive element-binding factor 1; Short=EREBP-1; Short=OsEREBP1	-	-	-	-	-	-	-	-	-	-	PF04909.14//PF00847.20	Amidohydro_2//AP2	GO:0006351	transcription, DNA-templated	--	--	--	--
TRINITY_DN42882_c1_g1	0.946983	9.60328	-3.3421	0.026476	1	gi|1003737505|gb|KXX74412.1|	1003737505	74.3	5.63e-35	hypothetical protein MMYC01_209196 [Madurella mycetomatis]	gi|1607500490|ref|XM_028634876.1|	1607500490	65.8	2.72e-06	Verticillium nonalfalfae hypothetical protein (D7B24_000624), partial mRNA	-	-	-	-	-	-	-	-	-	-	-	-	-	-	-	-	-	-	-	-	-	-	-
TRINITY_DN39360_c0_g1	2.57642	26.8916	-3.3837	0.019588	1	gi|758344937|dbj|GAN11837.1|	758344937	99.4	1.5e-21	conserved hypothetical protein [Mucor ambiguus]	gi|1101273574|pdb|5JVH|X	1101273574	1493	0	Chain X, The Crystal Structure Large Ribosomal Subunit (50s) Of Deinococcus Radiodurans In Complex With Evernimicin	-	-	-	-	-	-	-	-	-	-	-	-	-	-	-	-	-	-	-	-	-	-	-
TRINITY_DN150719_c0_g1	0.963848	10.4519	-3.4388	0.014778	1	gi|1066284541|ref|XP_018036350.1|	1066284541	140	1.36e-38	hypothetical protein CC84DRAFT_1164392 [Paraphaeosphaeria sporulosa]	-	-	-	-	-	-	-	-	-	-	-	-	-	-	-	-	-	-	-	-	PF17304.2	DUF5353	--	--	--	--	GO:0044425	membrane part
TRINITY_DN52400_c0_g4	2.66021	29.2961	-3.4611	0.016989	1	gi|474290914|gb|EMS61296.1|	474290914	80.5	1.55e-13	hypothetical protein TRIUR3_22309 [Triticum urartu]	gi|1149820203|ref|XM_020313007.1|	1149820203	390	6.62e-104	PREDICTED: Aegilops tauschii subsp. tauschii aspartokinase 1, chloroplastic-like (LOC109754083), transcript variant X2, mRNA	-	-	-	-	-	-	-	-	-	-	-	-	-	-	-	-	-	-	-	-	-	-	-
TRINITY_DN38653_c0_g1	1.31378	14.5956	-3.4737	0.0036441	1	gi|1046802875|gb|OCL08966.1|	1046802875	107	7.87e-27	hypothetical protein AOQ84DRAFT_317609 [Glonium stellatum]	-	-	-	-	-	-	-	-	-	-	-	-	-	-	-	-	-	-	-	-	-	-	-	-	-	-	-	-
TRINITY_DN136867_c0_g1	0.665052	7.57346	-3.5094	0.039556	1	gi|53792751|dbj|BAD53787.1|	53792751	64.3	4.07e-47	hypothetical protein [Oryza sativa Japonica Group]	-	-	-	-	-	-	-	-	-	-	-	-	-	-	-	-	-	-	-	-	-	-	-	-	-	-	-	-
TRINITY_DN161422_c0_g1	0.666132	7.61594	-3.5151	0.039161	1	gi|1028897448|gb|OAK99703.1|	1028897448	74.3	4.55e-15	hypothetical protein IQ06DRAFT_184339, partial [Stagonospora sp. SRC1lsM3a]	-	-	-	-	-	-	-	-	-	-	-	-	-	-	-	-	-	-	-	-	-	-	-	-	-	-	-	-
TRINITY_DN31134_c0_g1	1.66479	19.0773	-3.5184	0.00067241	1	gi|223515678|gb|EEF24754.1|	223515678	90.5	1.63e-20	conserved hypothetical protein [Ricinus communis]	gi|302924465|ref|XM_003053849.1|	302924465	78.7	2.71e-10	Nectria haematococca mpVI 77-13-4 hypothetical protein, mRNA	-	-	-	-	-	-	-	-	-	-	-	-	-	-	-	PF10685.9	KGG	-	-	-	-	-	-
TRINITY_DN169485_c0_g1	0.631322	7.32058	-3.5355	0.046828	1	gi|1028892059|gb|OAK94331.1|	1028892059	136	1.85e-40	hypothetical protein IQ06DRAFT_286268 [Stagonospora sp. SRC1lsM3a]	-	-	-	-	-	-	-	-	-	-	-	-	-	-	-	-	-	-	-	-	PF05532.12	CsbD	-	-	-	-	-	-
TRINITY_DN34688_c0_g1	0.631322	7.39266	-3.5496	0.046072	1	gi|821082233|gb|KKY35699.1|	821082233	73.2	1.04e-15	hypothetical protein UCDDA912_g04307 [Diaporthe ampelina]	-	-	-	-	-	-	-	-	-	-	-	-	-	-	-	-	-	-	-	-	-	-	-	-	-	-	-	-
TRINITY_DN46671_c0_g1	3.57562	42.4888	-3.5708	0.00012768	0.40463	gi|223511809|gb|EEF23877.1|	223511809	496	1.51e-175	Protein arginine N-methyltransferase, putative, partial [Ricinus communis]	gi|1148313812|gb|CP019510.1|	1148313812	640	4.75e-179	Janthinobacterium sp. LM6, complete genome	gi|257096257|sp|B4HJC0.1|CARM1_DROSE	257096257	58.9	2.7e-08	RecName: Full=Histone-arginine methyltransferase CARMER	-	-	-	-	-	-	-	KOG1499	OKT	Protein arginine N-methyltransferase PRMT1 and related enzymes	PF13649.6	Methyltransf_25	GO:0006479	protein methylation	GO:0008168	methyltransferase activity	--	--
TRINITY_DN48074_c0_g1	0.648727	7.7512	-3.5787	0.038119	1	gi|701777820|gb|KGQ11486.1|	701777820	84	1.23e-14	Flagellar basal-body rod protein flgG [Beauveria bassiana D1-5]	gi|1336928287|emb|LT962480.1|	1336928287	449	9.62e-122	Pseudomonas syringae pv. syringae isolate CFBP4215 genome assembly, chromosome: 1	gi|17380480|sp|Q52946.2|FLGG_RHIME	17380480	80.5	7.26e-16	RecName: Full=Flagellar basal-body rod protein FlgG; AltName: Full=Distal rod protein	Cellular Processes	Cell motility	Flagellar assembly	ko02040	K02391	flagellar basal-body rod protein FlgF	--	-	-	-	PF00460.20//PF06429.13	Flg_bb_rod//Flg_bbr_C	--	--	GO:0016787	hydrolase activity	GO:0044464	cell part
TRINITY_DN152348_c0_g1	1.27951	15.3544	-3.585	0.0021195	1	gi|928531862|ref|XP_014084728.1|	928531862	282	2.08e-92	hypothetical protein COCC4DRAFT_35709 [Bipolaris maydis ATCC 48331]	gi|302416874|ref|XM_003006223.1|	302416874	67.6	8.15e-07	Verticillium alfalfae VaMs.102 conserved hypothetical protein partial mRNA	-	-	-	-	-	-	-	-	-	-	-	-	-	-	-	-	-	--	--	--	--	GO:0016020	membrane
TRINITY_DN110470_c0_g1	1.27951	15.4066	-3.5899	0.0076489	1	gi|1046803910|gb|OCL09814.1|	1046803910	177	4.09e-55	putative RNA binding protein [Glonium stellatum]	-	-	-	-	-	gi|74625406|sp|Q9P7K6.1|SDO1L_SCHPO	74625406	64.3	1.81e-12	RecName: Full=SDO1-like protein C21C3.19	-	-	-	-	-	-	-	-	-	-	PF01172.18	SBDS	--	--	--	--	GO:0016021	integral component of membrane
TRINITY_DN42327_c0_g1	0.648187	8.05546	-3.6355	0.032031	1	gi|701768535|gb|KGQ03834.1|	701768535	229	6.71e-63	Flagellar M-ring protein [Beauveria bassiana D1-5]	gi|1519134079|gb|CP033832.1|	1519134079	870	0	Pseudomonas aeruginosa strain FDAARGOS_505 chromosome, complete genome	gi|166214853|sp|A6V990.1|FLIE_PSEA7	166214853	140	5.61e-39	RecName: Full=Flagellar hook-basal body complex protein FliE	Cellular Processes	Cell motility	Flagellar assembly	ko02040	K02409	flagellar M-ring protein FliF	--	-	-	-	PF01514.17//PF08345.11//PF02049.18	YscJ_FliF//YscJ_FliF_C//FliE	-	-	-	-	-	-
TRINITY_DN39568_c0_g2	0.665052	9.00394	-3.759	0.030732	1	gi|171688330|ref|XP_001909105.1|	171688330	76.6	1.75e-14	uncharacterized protein PODANS_3_3230 [Podospora anserina S mat+]	gi|514681794|ref|XM_004988425.1|	514681794	65.8	3.6e-06	Salpingoeca rosetta hypothetical protein partial mRNA	-	-	-	-	-	-	-	-	-	-	-	-	-	-	-	PF00236.18//PF08098.11	Hormone_6//ATX_III	-	-	-	-	-	-
TRINITY_DN91446_c0_g1	0.648187	8.84371	-3.7702	0.036273	1	gi|169617305|ref|XP_001802067.1|	169617305	58.5	2.4e-08	hypothetical protein SNOG_11830 [Parastagonospora nodorum SN15]	-	-	-	-	-	-	-	-	-	-	-	-	-	-	-	-	-	-	-	-	-	-	-	-	-	-	-	-
TRINITY_DN39159_c0_g1	0.631322	9.4424	-3.9027	0.013791	1	gi|116179798|ref|XP_001219748.1|	116179798	179	6.42e-55	hypothetical protein CHGG_00527 [Chaetomium globosum CBS 148.51]	-	-	-	-	-	-	-	-	-	-	-	-	-	-	-	-	-	-	-	-	-	-	--	--	--	--	GO:0016021	integral component of membrane
TRINITY_DN88822_c0_g1	0.631322	9.78608	-3.9543	0.012669	1	gi|590021340|gb|EXK23198.1|	590021340	308	1.16e-103	hypothetical protein FOMG_20021 [Fusarium oxysporum f. sp. melonis 26406]	-	-	-	-	-	gi|81770964|sp|Q8YS92.1|NICK_NOSS1	81770964	56.2	1.07e-07	RecName: Full=DNA nickase; AltName: Full=Alr3199 protein	-	-	-	-	-	-	-	-	-	-	PF01814.23	Hemerythrin	-	-	-	-	-	-
TRINITY_DN40532_c0_g1	0.997578	15.5993	-3.9669	0.0010176	1	gi|1023966757|gb|KZV15090.1|	1023966757	218	5.93e-66	protein TRIGALACTOSYLDIACYLGLYCEROL [Dorcoceras hygrometricum]	gi|308746527|gb|CP002272.1|	308746527	1291	0	Enterobacter lignolyticus SCF1, complete genome	gi|81670420|sp|P73009.1|Y1045_SYNY3	81670420	129	5.34e-33	RecName: Full=Probable ABC transporter permease protein slr1045	Environmental Information Processing	Membrane transport	ABC transporters	ko02010	K02066	phospholipid/cholesterol/gamma-HCH transport system permease protein	--	-	-	-	PF02405.16//PF02470.20//PF02639.14	MlaE//MlaD//DUF188	-	-	-	-	-	-
TRINITY_DN109663_c1_g1	0.648727	10.2345	-3.9797	0.010189	1	gi|125525107|gb|EAY73221.1|	125525107	312	1.32e-99	hypothetical protein OsI_01094 [Oryza sativa Indica Group]	gi|1638105436|gb|CP040017.1|	1638105436	518	2.31e-142	Massilia umbonata strain DSMZ 26121 chromosome, complete genome	gi|17380368|sp|O54239.2|FLIF_RHIME	17380368	143	4.71e-37	RecName: Full=Flagellar M-ring protein	-	-	-	-	-	-	-	-	-	-	PF01514.17//PF08345.11//PF09533.10	YscJ_FliF//YscJ_FliF_C//DUF2380	-	-	-	-	-	-
TRINITY_DN41704_c0_g1	0.665052	10.6633	-4.003	0.0074173	1	gi|311319919|gb|EFQ88075.1|	311319919	136	3.5e-37	hypothetical protein PTT_16193 [Pyrenophora teres f. teres 0-1]	-	-	-	-	-	-	-	-	-	-	-	-	-	-	-	-	-	-	-	-	PF14273.6	DUF4360	-	-	-	-	-	-
TRINITY_DN20869_c0_g1	0.665052	11.8616	-4.1567	0.0032835	1	gi|116180824|ref|XP_001220261.1|	116180824	244	6.13e-76	hypothetical protein CHGG_01040 [Chaetomium globosum CBS 148.51]	gi|347005580|gb|CP003002.1|	347005580	167	9.25e-37	Myceliophthora thermophila ATCC 42464 chromosome 1, complete sequence	-	-	-	-	-	-	-	-	-	-	-	-	-	-	-	PF06687.12	SUR7	--	--	--	--	GO:0016020	membrane
TRINITY_DN51398_c0_g1	5.62245	105.348	-4.2278	0.00034818	0.75404	gi|701771242|gb|KGQ06071.1|	701771242	638	0	Uncharacterized protein yciM [Beauveria bassiana D1-5]	gi|1563885461|gb|CP035385.1|	1563885461	941	0	Enterobacter hormaechei strain S11_16 chromosome, complete genome	gi|1175581|sp|P44129.1|LAPA_HAEIN	1175581	67	1.9e-12	RecName: Full=Probable lipopolysaccharide assembly protein A	-	-	-	-	-	-	-	-	-	-	PF01569.21//PF06305.11//PF13424.6//PF14559.6//PF18073.1	PAP2//LapA_dom//TPR_12//TPR_19//Rubredoxin_2	GO:0008653//GO:0044205//GO:0006207	lipopolysaccharide metabolic process//'de novo' UMP biosynthetic process//'de novo' pyrimidine nucleobase biosynthetic process	GO:0004590	orotidine-5'-phosphate decarboxylase activity	--	--
TRINITY_DN35758_c0_g1	0.665052	13.3432	-4.3265	0.0016412	1	gi|222622939|gb|EEE57071.1|	222622939	56.2	3.4e-06	hypothetical protein OsJ_06894 [Oryza sativa Japonica Group]	-	-	-	-	-	-	-	-	-	-	-	-	-	-	-	-	-	-	-	-	-	-	-	-	-	-	-	-
TRINITY_DN36343_c0_g1	0.333066	6.87601	-4.3677	0.043521	1	gi|1001606906|gb|KXS10730.1|	1001606906	123	1.75e-30	Cys/Met metabolism pyridoxal-phosphate-dependent enzyme [Gonapodya prolifera JEL478]	-	-	-	-	-	gi|20140519|sp|P75874.2|YCCU_ECOLI	20140519	138	1.46e-41	RecName: Full=Uncharacterized protein YccU	-	-	-	-	-	-	-	-	-	-	PF13380.6	CoA_binding_2	-	-	-	-	-	-
TRINITY_DN167703_c0_g1	0.315661	7.20708	-4.513	0.022399	1	gi|514793613|ref|XP_004972858.1|	514793613	218	1.01e-62	uncharacterized protein LOC101755589 isoform X1 [Setaria italica]	-	-	-	-	-	-	-	-	-	-	-	-	-	-	-	-	-	-	-	-	PF13968.6	DUF4220	--	--	--	--	GO:0016020	membrane
TRINITY_DN43563_c0_g1	0.315661	7.7443	-4.6167	0.01916	1	gi|347976237|ref|XP_003437448.1|	347976237	330	2.04e-109	uncharacterized protein PODANS_6_10260 [Podospora anserina S mat+]	gi|1240656081|ref|XM_022428562.1|	1240656081	145	3.9e-30	Pochonia chlamydosporia 170 mannitol-1-phosphate 5-dehydrogenase (VFPPC_07486), partial mRNA	gi|229891117|sp|B2WME4.1|MTLD_PYRTR	229891117	224	1.49e-69	RecName: Full=Mannitol-1-phosphate 5-dehydrogenase; Short=M1PDH; Short=MPD; Short=MPDH	Metabolism	Carbohydrate metabolism	Fructose and mannose metabolism	ko00051	K00009	mannitol-1-phosphate 5-dehydrogenase	1.1.1.17	-	-	-	PF08125.13	Mannitol_dh_C	GO:0019594//GO:0055114	mannitol metabolic process//oxidation-reduction process	GO:0008926//GO:0050662	mannitol-1-phosphate 5-dehydrogenase activity//coenzyme binding	GO:0005576	extracellular region
TRINITY_DN37027_c0_g1	0.333066	8.7618	-4.7173	0.0093004	1	gi|983144834|gb|KWU42823.1|	983144834	390	3.25e-138	ribosomal protein L6 [Rhodotorula sp. JG-1b]	gi|452769674|gb|KC543661.1|	452769674	99	1.92e-16	Leptomonas pyrrhocoris clone C1111o3 hypothetical protein gene, partial cds	gi|21759391|sp|Q90YW0.1|RL9_ICTPU	21759391	205	1.49e-66	RecName: Full=60S ribosomal protein L9	Genetic Information Processing	Translation	Ribosome	ko03010	K02940	large subunit ribosomal protein L9e	--	-	-	-	PF00347.23	Ribosomal_L6	GO:0006412	translation	GO:0003735//GO:0019843	structural constituent of ribosome//rRNA binding	GO:0005840	ribosome
TRINITY_DN64804_c1_g2	0.648727	17.1746	-4.7265	0.041906	1	gi|669028418|emb|CDM82213.1|	669028418	81.6	2.82e-14	unnamed protein product [Triticum aestivum]	gi|1282798539|gb|MG560142.1|	1282798539	97.1	1.55e-15	Triticum aestivum omega gliadin-D1, omega gliadin-D2, omega gliadin-D3, gamma gliadin-D1, delta gliadin-D1, gamma gliadin-D2, gamma gliadin-D3, gamma gliadin-D4, LMW-D1, LMW-D2, LMW-D3, LMW-D6, and LMW-D7 genes, complete cds	-	-	-	-	-	-	-	-	-	-	-	-	-	-	-	-	-	-	-	-	-	-	-
TRINITY_DN33581_c0_g1	1.57831	43.7297	-4.7922	0.017773	1	gi|669027400|emb|CDM80748.1|	669027400	229	2.63e-145	unnamed protein product [Triticum aestivum]	gi|409102444|emb|HE996872.1|	409102444	342	3.47e-89	Triticum aestivum cv. Arina SNP, chromosome 3B, clone Taes_arina_ctg_75406	gi|75339043|sp|Q9ZUI0.1|Y2241_ARATH	75339043	53.1	8.98e-06	RecName: Full=Putative leucine-rich repeat receptor-like serine/threonine-protein kinase At2g24130; Flags: Precursor	-	-	-	-	-	-	-	KOG0619	R	FOG: Leucine rich repeat	PF13855.6//PF08263.12	LRR_8//LRRNT_2	--	--	--	--	GO:0016021	integral component of membrane
TRINITY_DN44425_c0_g3	0.997578	28.7931	-4.8512	0.034512	1	gi|1003739917|gb|KXX76213.1|	1003739917	467	9.13e-163	Endo-1,4-beta-xylanase [Madurella mycetomatis]	gi|698995391|ref|XM_009856375.1|	698995391	438	2.18e-118	Neurospora tetrasperma FGSC 2508 endo-1,4-beta-xylanase partial mRNA	gi|3915310|sp|O59859.1|XYNA_ASPAC	3915310	333	2.61e-111	RecName: Full=Endo-1,4-beta-xylanase; Short=Xylanase; AltName: Full=1,4-beta-D-xylan xylanohydrolase; AltName: Full=FIA-xylanase; Flags: Precursor	--	--	--	--	K01181	endo-1,4-beta-xylanase	3.2.1.8	-	-	-	PF00331.20//PF13407.6	Glyco_hydro_10//Peripla_BP_4	GO:0052051//GO:0045493	obsolete interaction with host via protein secreted by type II secretion system//xylan catabolic process	GO:0031176	endo-1,4-beta-xylanase activity	GO:0005576	extracellular region
TRINITY_DN44925_c0_g1	0.332526	10.2218	-4.942	0.0039671	1	gi|327309182|ref|XP_003239282.1|	327309182	84.7	1.54e-19	hypothetical protein TERG_01263 [Trichophyton rubrum CBS 118892]	-	-	-	-	-	-	-	-	-	-	-	-	-	-	-	-	-	-	-	-	-	-	--	--	--	--	GO:0016021	integral component of membrane
TRINITY_DN45878_c0_g1	0.332526	12.2526	-5.2035	0.0011521	1	gi|1032640622|gb|OAQ22115.1|	1032640622	124	4.58e-34	50S ribosomal protein L27 [Mortierella elongata AG-77]	gi|1417767986|gb|CP030171.1|	1417767986	1110	0	Klebsiella quasipneumoniae subsp. quasipneumoniae strain A708 chromosome, complete genome	gi|226733233|sp|B2VGS9.1|RL21_ERWT9	226733233	192	3.29e-62	RecName: Full=50S ribosomal protein L21	Genetic Information Processing	Translation	Ribosome	ko03010	K02888	large subunit ribosomal protein L21	--	KOG4600	J	Mitochondrial ribosomal protein MRP7 (L2)	PF01016.19//PF00829.21	Ribosomal_L27//Ribosomal_L21p	GO:0006412	translation	GO:0003735	structural constituent of ribosome	GO:0005762//GO:0009507	mitochondrial large ribosomal subunit//chloroplast
TRINITY_DN46627_c0_g3	0.332526	16.9613	-5.6726	0.0028926	1	gi|701777822|gb|KGQ11488.1|	701777822	253	3.11e-73	Flagellar hook protein flgE [Beauveria bassiana D1-5]	gi|1524379544|gb|CP027750.1|	1524379544	148	8.44e-31	Pseudomonas chlororaphis subsp. aureofaciens strain ChPhzS24 chromosome, complete genome	gi|38257619|sp|Q8FUS9.1|FLGE_BRUSU	38257619	122	1.22e-28	RecName: Full=Flagellar hook protein FlgE	Cellular Processes	Cell motility	Flagellar assembly	ko02040	K02390	flagellar hook protein FlgE	--	-	-	-	PF00460.20//PF06429.13//PF07559.14//PF03963.14//PF13861.6//PF13860.6//PF08842.10	Flg_bb_rod//Flg_bbr_C//FlaE//FlgD//FLgD_tudor//FlgD_ig//Mfa2	-	-	-	-	-	-
TRINITY_DN40763_c0_g1	0.333066	17.4988	-5.7153	4.9708e-05	0.21091	gi|255073925|ref|XP_002500637.1|	255073925	92.4	1.19e-19	predicted protein, partial [Micromonas commoda]	gi|1384374678|gb|CP029041.1|	1384374678	307	4.85e-79	Salmonella enterica strain CFSAN051295 chromosome, complete genome	gi|254789043|sp|B5FJ36.1|TILS_SALDC	254789043	272	1.44e-87	RecName: Full=tRNA(Ile)-lysidine synthase; AltName: Full=tRNA(Ile)-2-lysyl-cytidine synthase; AltName: Full=tRNA(Ile)-lysidine synthetase	-	-	-	-	-	-	-	-	-	-	PF00903.25//PF01171.20	Glyoxalase//ATP_bind_3	-	-	-	-	-	-
TRINITY_DN41190_c0_g1	0.332526	20.9481	-5.9772	0.010061	1	gi|701779572|gb|KGQ12969.1|	701779572	706	0	Glutathione reductase [Beauveria bassiana D1-5]	gi|1450475187|gb|CP031577.1|	1450475187	1166	0	Klebsiella pneumoniae strain S12 chromosome, complete genome	gi|54036015|sp|Q74ZK4.1|GSHR_ASHGO	54036015	377	1.39e-126	RecName: Full=Glutathione reductase; Short=GR; Short=GRase	Organismal Systems	Endocrine system	Thyroid hormone synthesis	ko04918	K00383	glutathione reductase (NADPH)	1.8.1.7	KOG0405	Q	Pyridine nucleotide-disulphide oxidoreductase	PF07992.14//PF02852.22	Pyr_redox_2//Pyr_redox_dim	GO:0070887//GO:0055114//GO:0098869//GO:0045454//GO:0006749	cellular response to chemical stimulus//oxidation-reduction process//cellular oxidant detoxification//cell redox homeostasis//glutathione metabolic process	GO:0004362//GO:0050660//GO:0050661	glutathione-disulfide reductase activity//flavin adenine dinucleotide binding//NADP binding	GO:0044424	intracellular part
TRINITY_DN43196_c0_g1	0.332526	27.1408	-6.3509	1.2086e-07	0.0021449	gi|701771242|gb|KGQ06071.1|	701771242	383	6.29e-124	Uncharacterized protein yciM [Beauveria bassiana D1-5]	gi|1465448214|gb|CP031613.1|	1465448214	678	0	Klebsiella pneumoniae strain ZYST1 chromosome, complete genome	gi|226730226|sp|B5XS09.1|PYRF_KLEP3	226730226	382	5.22e-130	RecName: Full=Orotidine 5'-phosphate decarboxylase; AltName: Full=OMP decarboxylase; Short=OMPDCase; Short=OMPdecase	Metabolism	Nucleotide metabolism	Pyrimidine metabolism	ko00240	K01591	orotidine-5'-phosphate decarboxylase	4.1.1.23	-	-	-	PF05433.15//PF01253.22//PF05046.14//PF00215.24	Rick_17kDa_Anti//SUI1//Img2//OMPdecase	GO:0008653//GO:0044205//GO:0006207	lipopolysaccharide metabolic process//'de novo' UMP biosynthetic process//'de novo' pyrimidine nucleobase biosynthetic process	GO:0004590	orotidine-5'-phosphate decarboxylase activity	--	--
TRINITY_DN55257_c0_g5	0.332526	41.4134	-6.9605	0.0079149	1	gi|429201197|gb|AFZ77240.1|	429201197	76.6	1.66e-13	salt-induced protein [Leymus chinensis]	-	-	-	-	-	-	-	-	-	-	-	-	-	-	-	-	-	-	-	-	-	-	-	-	-	-	-	-
